# Supplementary material for: Assessing the relationship between near-infrared spectroscopy-derived regional cerebral oxygenation and neurological dysfunction in critically ill adults: a prospective observational multicentre protocol, on behalf of the Canadian Critical Care Trials Group
Source: PubMed Central journal article supplement — BMJ Open. 2019 Jun 25;9(6):e029189. doi: 10.1136/bmjopen-2019-029189 (PMC6597627; doi:10.1136/bmjopen-2019-029189), 2019-06-25
Supplement: bmjopen-2019-029189.draft_revisions.pdf [file bmjopen-2019-029189.draft_revisions.pdf]

# BMJ Open

BMJ Open is committed to open peer review. As part of this commitment we make the peer review history of every article we publish publicly available.

When an article is published we post the peer reviewers' comments and the authors' responses online. We also post the versions of the paper that were used during peer review. These are the versions that the peer review comments apply to.

The versions of the paper that follow are the versions that were submitted during the peer review process. They are not the versions of record or the final published versions. They should not be cited or distributed as the published version of this manuscript.

BMJ Open is an open access journal and the full, final, typeset and author-corrected version of record of the manuscript is available on our site with no access controls, subscription charges or pay-per-view fees (<http://bmjopen.bmj.com>).

If you have any questions on BMJ Open's open peer review process please email [info.bmjopen@bmj.com](mailto:info.bmjopen@bmj.com)

# BMJ Open

## Assessing the relationship between near-infrared spectroscopy derived regional cerebral oxygenation and neurological dysfunction in critically ill adults: a prospective multi-centre protocol, on behalf of the Canadian Critical Care Trials Group

|                                                                                                                                                         |                                                                                                                                                                                                                                                                                                                                                                                                                                                                                                                                                                                                                                                                                                                                                                                                                                                                                                                                                                                                                                                                                                                                                                                                                                                                                                                                                                                                |
|---------------------------------------------------------------------------------------------------------------------------------------------------------|------------------------------------------------------------------------------------------------------------------------------------------------------------------------------------------------------------------------------------------------------------------------------------------------------------------------------------------------------------------------------------------------------------------------------------------------------------------------------------------------------------------------------------------------------------------------------------------------------------------------------------------------------------------------------------------------------------------------------------------------------------------------------------------------------------------------------------------------------------------------------------------------------------------------------------------------------------------------------------------------------------------------------------------------------------------------------------------------------------------------------------------------------------------------------------------------------------------------------------------------------------------------------------------------------------------------------------------------------------------------------------------------|
| Journal:                                                                                                                                                | <i>BMJ Open</i>                                                                                                                                                                                                                                                                                                                                                                                                                                                                                                                                                                                                                                                                                                                                                                                                                                                                                                                                                                                                                                                                                                                                                                                                                                                                                                                                                                                |
| Manuscript ID                                                                                                                                           | bmjopen-2019-029189                                                                                                                                                                                                                                                                                                                                                                                                                                                                                                                                                                                                                                                                                                                                                                                                                                                                                                                                                                                                                                                                                                                                                                                                                                                                                                                                                                            |
| Article Type:                                                                                                                                           | Protocol                                                                                                                                                                                                                                                                                                                                                                                                                                                                                                                                                                                                                                                                                                                                                                                                                                                                                                                                                                                                                                                                                                                                                                                                                                                                                                                                                                                       |
| Date Submitted by the Author:                                                                                                                           | 17-Jan-2019                                                                                                                                                                                                                                                                                                                                                                                                                                                                                                                                                                                                                                                                                                                                                                                                                                                                                                                                                                                                                                                                                                                                                                                                                                                                                                                                                                                    |
| Complete List of Authors:                                                                                                                               | Wood, Michael; Queen's University, Centre For Neuroscience Studies<br>Khan, Jasmine; Queen's University, Centre for Neuroscience Studies<br>Lee, Kevin; Queen's Univeristy, School of Medicine<br>Maslove, David M; Queen's University , Critical Care Medicine<br>Muscedere, John; Kingston General Hospital, Critical Care Medicine<br>Hunt, Miranda; Queen's University, Critical Care Medicine<br>Scott, Stephen; Queen's University, Centre for Neuroscience Studies<br>Day, Andrew ; Queen's Unversity, Department of Community health and Epidemiology and CERU<br>Jacobson, Jill; Queen's University, Psychology<br>Ball, Ian; London Health Sciences Centre, Medicine<br>Slessarev, Marat; Western University, Medicine, Division of Geriatric Medicine<br>O'Regan, Niamh; Western University, Medicine, Division of Geriatric Medicine<br>English, Shane; University of Ottawa, Medicine (Critical Care); Ottawa Hospital Research Institute, Clinical Epidemiology Program<br>McCredie, Victoria; University of Toronto; Toronto Western Hospital, University Health Network, Medicine; Critical Care<br>Chasse, Michaël; Centre Hospitalier de L'Universite de Montreal, Medicine (Critical Care)<br>Griesdale, Donald; University of British Columbia, Department of Anesthesiology, Pharmacology & Therapeutics<br>Boyd, John; Kingston General Hospital, Critical Care Medicine |
| Keywords:                                                                                                                                               | Near-infrared spectroscopy, Cerebral autoregulation, KINARM, Delirium, Post-intensive care syndrome, RBANS                                                                                                                                                                                                                                                                                                                                                                                                                                                                                                                                                                                                                                                                                                                                                                                                                                                                                                                                                                                                                                                                                                                                                                                                                                                                                     |
| Note: The following files were submitted by the author for peer review, but cannot be converted to PDF. You must view these files (e.g. movies) online. |                                                                                                                                                                                                                                                                                                                                                                                                                                                                                                                                                                                                                                                                                                                                                                                                                                                                                                                                                                                                                                                                                                                                                                                                                                                                                                                                                                                                |
| Supplemental Figure 1.gif                                                                                                                               |                                                                                                                                                                                                                                                                                                                                                                                                                                                                                                                                                                                                                                                                                                                                                                                                                                                                                                                                                                                                                                                                                                                                                                                                                                                                                                                                                                                                |

1  
2  
3  
4  
5  
6  
7  
8  
9  
10  
11  
12  
13  
14  
15  
16  
17  
18  
19  
20  
21  
22  
23  
24  
25  
26  
27  
28  
29  
30  
31  
32  
33  
34  
35  
36  
37  
38  
39  
40  
41  
42  
43  
44  
45  
46  
47  
48  
49  
50  
51  
52  
53  
54  
55  
56  
57  
58  
59  
60

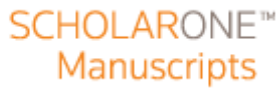

1  
2  
3  
4  
5 Title: Assessing the relationship between near-infrared spectroscopy derived  
6 regional cerebral oxygenation and neurological dysfunction in critically ill  
7 adults: a prospective multi-centre protocol, on behalf of the Canadian  
8 Critical Care Trials Group  
9

10  
11  
12 Authors: The Cerebral Oxygenation and Neurological Outcomes Following  
13 Critical Illness (CONFOCAL) Research Group  
14

15 Michael D. Wood, BA<sup>1</sup>, Jasmine Khan, BS<sup>1</sup>, Kevin F. H. Lee, PhD<sup>2</sup>,  
16 David Maslove, MSc, MD<sup>3,4</sup>, John Muscedere, MD<sup>3</sup>, Miranda Hunt, BA<sup>3</sup>  
17 Stephen H. Scott, PhD<sup>1</sup>, Andrew G. Day, MSc<sup>5</sup>, Jill A. Jacobson, PhD<sup>6</sup>  
18 Ian Ball, MD, MSc<sup>7</sup>, Marat Slessarev, MD, MSc<sup>7</sup>, Niamh O'Regan, MB  
19 BCh BAO, PhD<sup>7</sup>, Shane English, MD, MSc<sup>8,9</sup>, Victoria  
20 McCredie, MBChB, PhD<sup>10,11</sup>, Michael Chasse, MD, PhD<sup>12</sup>, Donald  
21 Griesdale, MD, MPH<sup>13</sup>, J. Gordon Boyd, MD, PhD<sup>1,3,4</sup>  
22  
23

24 Affiliations: <sup>1</sup>Centre for Neuroscience Studies, Queen's University, Kingston, ON,  
25 Canada  
26 <sup>2</sup>School of Medicine, Queen's University, Kingston, ON, Canada  
27 <sup>3</sup>Dept. of Critical Care Medicine, Queen's University, Kingston, ON,  
28 Canada  
29 <sup>4</sup>Dept. of Medicine, Queen's University, Kingston, ON, Canada  
30 <sup>5</sup>Kingston General Hospital Research Institute, Kingston, ON, Canada  
31 <sup>6</sup>Dept. of Psychology, Queen's University, Kingston, ON, Canada  
32 <sup>7</sup>Dept. of Medicine, Division of Geriatric Medicine, Western University,  
33 London, ON, Canada  
34 <sup>8</sup> Dept. of Medicine (Critical Care), University of Ottawa, Ottawa, ON,  
35 Canada  
36 <sup>9</sup>Clinical Epidemiology Program, Ottawa Hospital Research  
37 Institute, Ottawa ON, Canada  
38 <sup>10</sup>Interdepartmental Division of Critical Care Medicine, Department of  
39 Medicine, University of Toronto, Toronto, ON  
40 <sup>11</sup>Toronto Western Hospital, University Health Network, Toronto, ON  
41 <sup>12</sup> Dept. of Medicine (Critical Care), Université de Montreal, Montreal,  
42 QC, Canada  
43 <sup>13</sup>Department of Anesthesiology, Pharmacology & Therapeutics,  
44 University of British Columbia, Vancouver, BC, Canada  
45  
46

47  
48  
49 Corresponding  
50 Author:

51 J. Gordon Boyd, MD, PhD, FRCPC  
52 Associate Professor  
53 Dept. of Critical Care Medicine  
54 Davies 2, Kingston General Hospital  
55 76 Stuart Street, Kingston, ON, Canada K7L 2V7  
56 Tel: 613-549-6666 X 6228  
57  
58  
59  
60

1  
2  
3  
4  
5  
6  
7  
8  
9  
10  
11  
12  
13  
14  
15  
16  
17  
18  
19  
20  
21  
22  
23  
24  
25  
26  
27  
28  
29  
30  
31  
32  
33  
34  
35  
36  
37  
38  
39  
40  
41  
42  
43  
44  
45  
46  
47  
48  
49  
50  
51  
52  
53  
54  
55  
56  
57  
58  
59  
60

Email: [gordon.boyd@kingstonhsc.ca](mailto:gordon.boyd@kingstonhsc.ca)

For peer review only

**Abstract:**

*Introduction:* Survivors of critical illness frequently exhibit acute and chronic neurological complications. The underlying etiology of this dysfunction remains unknown but may be associated with cerebral ischemia. This study will use near-infrared spectroscopy (NIRS) to non-invasively quantify regional cerebral oxygenation (rSO<sub>2</sub>) to assess the association between poor rSO<sub>2</sub> during the first 72 hours of critical illness with the development of delirium, as well as long-term sensorimotor and cognitive impairment among intensive care unit (ICU) survivors.

*Methods and analysis:* This multi-centre prospective observational study will consider adult patients ( $\geq 18$  years old) eligible for enrolment if within 24 hours of ICU admission, they require mechanical ventilation, and/or vasopressor support. For 72 hours, rSO<sub>2</sub> will be continuously recorded, while vital signs (e.g., heart rate) and peripheral oxygenation saturation will be concurrently captured with data monitoring software. Arterial and central venous gases will be sampled every 12 hours for the 72h recording period and will include: pH, partial pressure of oxygen, partial pressure of carbon dioxide, and hemoglobin concentration. Participants will be screened daily for delirium with the confusion assessment method (CAM)-ICU, whereas the brief-CAM will be used on the ward. At 3- and 12-months post-ICU discharge, neurological function will be assessed with the Repeatable Battery for the Assessment of Neuropsychological Status and KINARM robot-based behavioral tasks.

*Ethics and Dissemination:* The study protocol has been approved in Ontario by a central research ethics board (Clinical Trials Ontario); non-Ontario sites will obtain local ethics approval. The study will be conducted under the guidance of the Canadian Critical Care Trials Group (CCCTG) and the results of this study will be presented at national meetings of the CCCTG for internal

1  
2  
3 peer review. Results will also be presented at national/international scientific conferences. Upon  
4  
5 completion, the study findings will be submitted for publication in peer-reviewed journals.  
6  
7

8 *Trial Registration:* This trial is registered on [clinicaltrials.gov](http://clinicaltrials.gov) (Identifier: [NCT03141619](https://clinicaltrials.gov/ct2/show/study/NCT03141619)),  
9  
10 registered May 5, 2017.  
11  
12

13 *Key Words:* Near-infrared spectroscopy; Cerebral oximetry; Cerebral autoregulation; KINARM,  
14  
15 Delirium; CAM-ICU; Post-intensive care syndrome; RBANS  
16  
17  
18  
19  
20  
21  
22  
23  
24  
25  
26  
27  
28  
29  
30  
31  
32  
33  
34  
35  
36  
37  
38  
39  
40  
41  
42  
43  
44  
45  
46  
47  
48  
49  
50  
51  
52  
53  
54  
55  
56  
57  
58  
59  
60

### Strengths and Limitations of this study:

- Potential to replicate our previous finding that poor regional cerebral oxygenation (rSO<sub>2</sub>) is an independent risk factor for the development of delirium in a representative cohort of critically ill patients and provide evidence for the utility of rSO<sub>2</sub> monitoring.
- Further assessment of dysfunctional cerebral autoregulation as a potential underlying mechanism associated with poor rSO<sub>2</sub> and the subsequent development of delirium and post-intensive care unit (ICU) neurological impairment.
- Regression analysis will include multiple clinically relevant covariates (e.g., sedative and analgesic medications) to further characterize the hemodynamic and physiological determinants of the near-infrared spectroscopy (NIRS) derived signal as preliminary steps to developing a rSO<sub>2</sub> resuscitation target during critical care.
- Correlating neurophysiological and cognitive performance metrics will further characterize post-ICU outcomes and identify modifiable risk factors (e.g., time spent < optimal mean arterial pressure, disturbed autoregulation duration); however, this study is observational and correlational in nature and will therefore limit causal inferences.
- Further investigation of the determinants of the NIRS signal has the potential to revolutionize critical care by providing clinicians with the ability to determine and maintain individualized blood pressure thresholds to respond to pathological alterations, implement precision-based medicine at bedside, and ensure adequate cerebral oxygenation to preserve neurological function among survivors of critical illness.



## Introduction:

Medical advancements in the intensive care unit (ICU) has led to a substantial reduction in mortality rates.<sup>1,2</sup> However, survivors frequently experience post-intensive care syndrome (PICS), which is characterized by cognitive, psychiatric, and physical impairments.<sup>3</sup> These complications have profound effects, including long-term cognitive impairments affecting between 25-75% of survivors,<sup>3</sup> and an approximately 50% decrease in full-time employment.<sup>4</sup> Therefore, modern critical care research should improve our understanding of, and the prevention of, long-term impairments in the growing number of ICU survivors.

A recent systematic review identified prolonged delirium as the most consistent and potentially modifiable risk factor for long-term cognitive impairment.<sup>5</sup> Patients with delirium experience persistent deficits in various domains, including: memory, executive function, verbal fluency, and attention.<sup>6-8</sup> Furthermore, robotic technology has indicated that ICU survivors also develop visuospatial and motor deficits.<sup>9</sup> Importantly, this population experiences chronic cognitive dysfunction similar to patients with moderate traumatic brain injury or mild Alzheimer's disease, with a duration-dependent effect of delirium on impairments in global cognition and executive function.<sup>6</sup>

Delirium is characterized by reduced awareness, emotional disturbances, restlessness, and incoherence with a 60-87% ICU incidence rate.<sup>10</sup> While risk factors associated with delirium include mechanical ventilation, age, and frailty,<sup>10</sup> the underlying etiology of delirium is poorly understood. Cerebral ischemia is thought to play a central role in delirium development; however, understanding this relationship presents several challenges due to the difficulty of continuously measuring cerebral perfusion in the ICU.

1  
2  
3 This issue has resulted in a limited number of studies investigating the influence of cerebral  
4 perfusion on delirium in critically ill patients (Reviewed in<sup>11</sup>). Near-infrared spectroscopy  
5 (NIRS) is a non-invasive technology that measures regional cerebral oxygenation (rSO<sub>2</sub>) as a  
6 surrogate marker of cerebral perfusion,<sup>12,13</sup> as rSO<sub>2</sub> values correlate with other markers of  
7 cerebral perfusion, including CT perfusion, jugular venous bulb oxygen saturation, and brain  
8 tissue oxygen tension.<sup>12-14</sup> Therefore, NIRS is an ideal candidate for both ICU research and  
9 clinical practice.

10  
11  
12 Feasibility and single-center prospective ICU studies have been performed with NIRS,  
13 discovering that low rSO<sub>2</sub> is an independent risk factor for the development of delirium.<sup>15,16</sup> A  
14 nested cohort in this study demonstrated that impaired cerebral auto-regulation (i.e., the ability to  
15 maintain stabilized and adequate cerebral perfusion) is also associated with the development and  
16 duration of delirium.<sup>17,18</sup> While these findings were statistically significant, a multi-centre  
17 observational study is necessary for external validation and the study of long-term outcomes.

18  
19  
20 Our overarching hypothesis is that decreased rSO<sub>2</sub> in the early stages of critical illness leads to  
21 the development of delirium, as well as long-term cognitive impairment among survivors. The  
22 study objectives are to further establish an association between rSO<sub>2</sub> and delirium, and to  
23 identify potential risk factors associated with delirium and long-term cognitive deficits. Overall,  
24 elucidating the mechanisms of delirium will allow for the development of preventative  
25 treatments to improve outcomes among ICU survivors.

## Methods and Analysis:

*Patient and Public Involvement:* At Kingston Health Sciences Centre (KHSC), our staff includes a patient experience advisor who is a critical care nurse that has been previously admitted with respiratory failure and shock. This experience as a front-line health care professional, as well as an ICU patient, will be invaluable to both patient and public involvement. In addition to the scientific community, patients and their families will also be central to the dissemination of our findings. Participants that selected to be informed of the results will be mailed/e-mailed the published findings upon study completion.

*Study locations and participants:* An overall visual schematic of the study design is shown in Figure 1. This prospective observational study will take place at 7 sites within Canada. KHSC will serve as the coordinating centre, as the ICU has a history of coordinating academic and industry funded studies and the staff are familiar with the CONFOCAL protocol, as the pilot study<sup>16</sup> was conducted at this site. Patients are considered eligible if they are  $\geq 18$  years old, have been admitted to the ICU  $> 24$  hours and have respiratory failure requiring invasive mechanical ventilation with an expected duration  $> 24$  hours, and/or have shock of any etiology. Shock will be defined by the need for one of the following vasopressors/inotropes: Dopamine  $\geq 7.5$  mcg/kg/min, Dobutamine  $\geq 5$  mcg/kg/min, Norepinephrine  $\geq 5$  mcg/min, Phenylephrine  $\geq 75$  mcg/min, Epinephrine at any dose, Milrinone at any dose (if used in conjunction with another agent), Vasopressin  $\geq 0.03$  u/min (if used in conjunction with another agent), which is adapted from the BRAIN-ICU inclusion criteria.<sup>6</sup> The exclusion criteria are admission to the ICU  $> 24$  hours, a life expectancy  $< 24$  hours, a primary central nervous system admitting diagnosis (e.g., traumatic brain injury, stroke, subarachnoid haemorrhage), and/or any reason that the subject may not be able to participate in the follow up assessments (e.g., limb amputation, paresis,

1  
2  
3 neuromuscular disorders). Post-cardiac arrest patients are also excluded from this study.

4  
5 Additional study sites will include the following: Toronto Western Hospital (Site PI Dr. Victoria  
6  
7 McCredie), Université de Montreal (Montreal, QC; Site PI Dr. Michael Chasse), Victoria  
8  
9 Hospital (London, ON; Site PI Dr. Ian Ball, with co-PIs Dr. Marat Slesserev and Dr. Niamh  
10  
11 O'Reagan), Ottawa General Hospital (Site PI Dr. Shane English), Ottawa Civic Hospital (Site PI  
12  
13 Dr. Shane English), and Vancouver General Hospital (Site PI Dr. Donald Griesdale). KHSC is  
14  
15 responsible for developing and maintaining the electronic case report forms (eCRF), data  
16  
17 management, and analysis. Recruitment at KHSC began on January 17, 2018.  
18  
19  
20  
21  
22  
23

24 *Recruitment and consent:* The Queen's University and Affiliated Hospitals Health Sciences  
25  
26 Research Ethics Board will serve as the board of record for the streamlined research ethics  
27  
28 review system (Clinical Trials Ontario) for which KHSC has gained approval; Non-Ontario sites  
29  
30 will obtain local ethics approval. All patients admitted to the ICU will be screened daily for  
31  
32 eligibility. The participant will be approached by a member of the research staff. If the  
33  
34 participant is unable to provide consent, the research staff will approach the Substitute Decision  
35  
36 Maker (SDM). The research coordinator or trained study staff will obtain informed consent and  
37  
38 documentation of the consent process will be noted in the patient's medical chart. As patients  
39  
40 meeting eligibility criteria are unlikely to be able to give informed consent at the time of  
41  
42 enrolment due to their critical condition, we will employ a deferred consent model when  
43  
44 appropriate (e.g., SDMs are frequently in an emotional state and may not be available to be  
45  
46 contacted), which has already been granted local research ethics board approval. When an SDM  
47  
48 is not available to approach, we will enrol the patient and begin trial procedures until the SDM is  
49  
50 available for a consent encounter, targeted to be within 72 hours of enrolment. However, we will  
51  
52  
53  
54  
55  
56  
57  
58  
59  
60

1  
2  
3 encourage an *a priori* informed consent whenever possible. The SDM response will be used to  
4  
5 continue all trial procedures or any further data collection. If the patient or substitute decision  
6  
7 maker declines enrolment, then the patient will be excluded, and all data obtained using deferred  
8  
9 consent will be confidentially destroyed. In addition, once the patient has regained capacity  
10  
11 according to the medical team, the patient will be approached to affirm or withdraw consent.  
12  
13 Each site will be provided with patient identification numbers, which will be assigned  
14  
15 sequentially when a patient is enrolled and will be used in all study documentation to ensure  
16  
17 patient confidentiality and anonymity. All eligible patients will be recorded on a screening log,  
18  
19 which will include their study ID, date of consent, or reason the patient could not be enrolled.  
20  
21 The de-identified screening log will be forwarded to the lead project coordinator on a monthly  
22  
23 basis. The individual site research coordinators and investigators will be responsible for ensuring  
24  
25 the ethical conduct of this trial, screening patients, obtaining consent, and training of staff as  
26  
27 needed. The principal investigators and co-investigators will review monthly compliance with  
28  
29 the study protocol and recruitment rates.  
30  
31  
32  
33  
34  
35

36 *Confidentiality:* To ensure patient confidentiality, identifying information will not be collected  
37  
38 on the Case Report Form. Patients will be identified to the coordinating centre only by their  
39  
40 unique study identification number. The site study coordinator will maintain a participant master  
41  
42 list including the participant name and linked study ID. At the end of the study, this master list  
43  
44 will be destroyed. In accordance with current requirements, we will store the de-identified data  
45  
46 for a minimum of 10 years.  
47  
48  
49

#### 50 **Data Collection:**

51  
52  
53 *rSO<sub>2</sub>, hemodynamics, medications, and clinical characteristics:* Patients will be enrolled within  
54  
55 the first 24 hours of their ICU admission. Immediately following enrolment, the patient will  
56  
57  
58  
59

1  
2  
3 undergo rSO<sub>2</sub> monitoring. A sensor will be placed in the centre of the patient's forehead, which  
4 is attached to the FORESIGHT ELITE oximeter (CASMED, Caster Medical, Canada). This  
5 device will provide continuous quantification of rSO<sub>2</sub>, every 2 seconds, for 72 hours. To assess  
6 the association between hemodynamics and rSO<sub>2</sub> recordings, we will use a commercially  
7 available system (Bedmaster, Excel Medical Electronics, FL, USA; or site equivalent) to capture  
8 the following vital signs from enrolled patients: heart rate (HR), systolic blood pressure (SBP),  
9 diastolic blood pressure (DBP), mean arterial pressure (MAP), and peripheral oxygen saturation  
10 (SpO<sub>2</sub>). These data are captured locally and uploaded to the eCRF (REDCap). Throughout this  
11 72-hour period of recording, we will document administered continuous infusion and intermittent  
12 bolus doses of vasoactive and sedative/analgesic medications, which will be converted to either  
13 "fentanyl equivalents" for narcotics, or "midazolam equivalents" for benzodiazepine  
14 medications. These conversion formulas have been previously described.<sup>19</sup> Severity of illness  
15 will be measured during the first 24 hours of ICU admission using the Acute Physiology and  
16 Chronic Health Evaluation II score (APACHE II). Pre-existing frailty will be assessed upon  
17 enrolment using the clinical frailty scale,<sup>20</sup> which is 9-point scale (e.g., 1 = very fit to 9 =  
18 terminally ill). All clinical data will be captured on the eCRF.

19  
20  
21  
22  
23  
24  
25  
26  
27  
28  
29  
30  
31  
32  
33  
34  
35  
36  
37  
38  
39  
40  
41 *Central venous and arterial blood collection:* Both arterial and central venous gases will be  
42 sampled every 12 hours during the 72h period of rSO<sub>2</sub> recording and will include: pH, partial  
43 pressure of oxygen (pO<sub>2</sub>), partial pressure of carbon dioxide (pCO<sub>2</sub>), and hemoglobin  
44 concentration (Hb). These blood samples will be collected only if a central line (PICC, internal  
45 jugular, subclavian) and arterial line are *already* in place.

46  
47  
48  
49  
50  
51  
52  
53 *Delirium screening:* Patients will be assessed daily for delirium throughout their entire hospital  
54 stay (ICU and ward; up to day 30) using validated screening tools; the Confusion Assessment  
55

1  
2  
3 Method (CAM)-ICU<sup>21</sup>, as well as the brief Confusion Assessment Method (bCAM)<sup>22</sup> which will  
4  
5 be administered on the ward. From the CAM-ICU, the CAM-ICU 7 (i.e., 7-point delirium  
6  
7 severity scale) will also be documented (i.e., 0-2: no delirium, 3-5: mild to moderate delirium,  
8  
9 and 6-7: severe delirium).<sup>23</sup> The ICU discharge day will be considered to be the day that the  
10  
11 attending writes orders to discharge, in order to avoid the influence of delayed discharge.  
12  
13

14  
15 *Determination of pre-existing cognitive impairment:* Our pilot study<sup>16</sup> excluded 10% of patients  
16  
17 with a documented history of cognitive impairment in their medical chart, which may limit  
18  
19 external validity. Importantly, individuals may have substantial cognitive impairment prior to  
20  
21 enrolment but did not receive any formal diagnosis. To address this potential confound, all  
22  
23 patients will be assessed, upon enrolment, using the clinical dementia rating (CDR) scale.<sup>24</sup> The  
24  
25 CDR is a scale from 0 (Normal) to 3 (severe dementia) that is calculated from a standardized  
26  
27 scoring sheet completed by interviewing a patient or their caregiver. All staff completing the  
28  
29 interview and scoring sheet will undergo rigorous online training and pass a certification exam.  
30  
31 A diagnosis of pre-existing cognitive impairment will be defined as a CDR >1.  
32  
33  
34  
35  
36  
37  
38  
39

### 40 **3- and 12-Month Follow Up:**

41  
42 *Neuropsychological assessment: Repeatable Battery for the Assessment of Neuropsychological*  
43  
44 *Status (RBANS):* Participants will complete a 3- and 12-month follow up assessment in which  
45  
46 the RBANS will be administered by a trained researcher. The RBANS assesses global cognition,  
47  
48 as well as several subdomains (i.e., immediate and delayed memory, visuospatial/constructional,  
49  
50 language, and attention). These indices have been described previously,<sup>25</sup> and survivors will be  
51  
52 compared to age-matched controls. To improve follow up rates, in home/hospital testing will be  
53  
54  
55  
56  
57  
58  
59

1  
2  
3 performed for individuals not able to return for laboratory assessment. Participant scores are  
4 converted to standardized values in which the normative range will be considered a mean of  
5  
6 100 $\pm$ 24.75 (1.65 SD). Participants that score  $>75$  will not be considered impaired, as these  
7  
8 subjects are performing within or above the normative range. The RBANS assessment requires  
9  
10 ~20-30 minutes to complete.  
11  
12  
13

14  
15 *KINARM Assessment:* Participants (from the Kingston region only) will complete a 3- and 12-  
16  
17 month follow up assessment using the End-Point bimanual KINARM robot (BKIN  
18  
19 Technologies, Kingston). With each hand, the seated subject grasps a handle attached to a planar  
20  
21 robotic device that permits movements in the horizontal plane with an integrated virtual reality  
22  
23 system that presents objects in the horizontal plane (Figure 2). Subjects will perform a  
24  
25 behavioural battery to quantify a broad range of sensorimotor, and cognitive function using their  
26  
27 upper limbs. A trained operator selects a task from the software menu, reads the standardized  
28  
29 instructions, and then monitors performance in real-time. We will administer 7 tasks from the  
30  
31 KINARM Standard Tests™ including: Spatial Span (SS, Figure 3A), Visually Guided Reaching  
32  
33 (VGR, Figure 3B), Reverse Visually Guided Reaching (RVGR, Figure 3B), Ball on Bar (BonB,  
34  
35 Figure 3C), Arm Position Matching (APM, Figure 3D), Object Hit (OH, see Figure 3E), Object  
36  
37 Hit and Avoid (OHA, see Figure 3F). Each task has been previously described,<sup>26</sup> and quantifies  
38  
39 subject performance using approximately 6 to 12 metrics per task. Each metric is converted into  
40  
41 normalized units based on healthy subject performance, considering the influence of sex, age,  
42  
43 and handedness (0 is mean performance and  $\pm 1$  is a standard deviation from the mean). For each  
44  
45 task, a task score will also be generated to provide a global performance measure with values  
46  
47 that are equivalent to standard deviation units with zero specifying best possible performance,  
48  
49 and higher values indicating worse performance. Therefore, performance will be considered  
50  
51  
52  
53  
54  
55  
56  
57  
58  
59  
60



1  
2  
3 abnormal if the task score is outside the +1.96 range (i.e., 5th percentile). The task score has been  
4  
5 previously described.<sup>27</sup> The KINARM assessment takes ~45 minutes to complete.  
6  
7

### 8 **Sample Size Calculation:**

9  
10  
11 *Primary Outcome:* Our overall hypothesis is that poor cerebral perfusion contributes to delirium  
12  
13 and long-term cognitive impairment. For study purposes, we define poor cerebral perfusion as  
14  
15 the composite of 1) low mean rSO<sub>2</sub>, 2) duration of impaired cerebral autoregulation, and 3) time  
16  
17 outside individualized optimal MAP (MAP<sub>OPT</sub>), which will be discussed in more detail in the  
18  
19 statistical plan section. We acknowledge that this is an imperfect measure of cerebral perfusion.  
20  
21 However, this is a comprehensive, continuous, and non-invasive assessment of cerebral  
22  
23 perfusion. For our primary outcome (CAM-7 delirium severity score), we plan to assess  
24  
25 approximately 400 patients, to allow 10 degrees of freedom for our 3 measures of perfusion (i.e.,  
26  
27 mean rSO<sub>2</sub>, duration of disturbed cerebral autoregulation, duration outside MAP<sub>OPT</sub>) and  
28  
29 controlling for the 9 covariates (see below). The 10 degrees of freedom will allow us to model  
30  
31 non-linear relationships between the 3 measures of cerebral perfusion and delirium severity. This  
32  
33 sample size achieves 90% power to detect an R<sup>2</sup> of 0.050 collectively among these measures of  
34  
35 cerebral perfusion and using an F-test with a significance level (alpha) of 0.050 (see Figure 4). In  
36  
37 order to have ≥400 patients to assess, we will enrol 500 patients, as our prior work has  
38  
39 demonstrated that ~20% of patients remain comatose (RASS = -4 or -5) during their entire ICU  
40  
41 stay<sup>16</sup>, and cannot be assessed for delirium.  
42  
43  
44  
45  
46  
47  
48

### 49 *Secondary Outcomes-Physiological determinants of rSO<sub>2</sub> and neurological outcomes*

50  
51  
52 For evaluating the determinants of the rSO<sub>2</sub> signal, we will assess the association between each  
53  
54 of the 9 pre-specified candidate predictors of rSO<sub>2</sub> after controlling for the 4 co-variates (see  
55  
56  
57  
58  
59  
60

below for co-variables). We will use a Bonferroni correction ( $0.05/9=0.0056$ ) to control for multiple testing. With the 500 patients recruited, and a multivariate regression model that includes 13 independent variables, this testing strategy will provide 90% power to identify any predictor that explains an additional 3.2% of the variance of  $rSO_2$  after controlling for the other variables in the model. This sample size is sufficient to identify independent significant predictors that account for a small-moderate degree of variance in the overall  $rSO_2$  signal. Given our overall sample size of 500 patients recruited, we are anticipating 350 survivors, assuming a 30% mortality rate observed in our prior study, which will provide sufficient power to detect important predictors of long-term neurological outcomes. These have been intentionally not specified *a priori*, as this will depend on our findings related to cerebral perfusion and delirium.

All sample size calculations were conducted using Power Analysis and Sample Size Software (Version 15).<sup>28</sup>

### **Statistical Plan:**

*Quantification of disturbed cerebral autoregulation:* Cerebral autoregulation will be evaluated by computing customized algorithms (MATLAB, MathWorks, MA, USA) of the time-varying Spearman correlation coefficients between  $rSO_2$  and MAP (i.e., cerebral autoregulation index, COx) with a moving time window advanced in 1 min steps over the 72-hour period of recording. This cerebral autoregulation assessment has been previously described<sup>18</sup> and a visual representation can be observed in Figure 5. In addition, we will perform the COx across varying window lengths to further assess the optimal window length of recording (e.g., 5, 10, 30, 60, 120, 240, 300-minute windows). Positive COx values (i.e., MAP and  $rSO_2$  move in the same direction) reflect dysfunctional cerebral autoregulation, whereas negative (i.e., MAP and  $rSO_2$  move in the opposite direction) and near zero ( $< 0.3$ ) indicate intact cerebral autoregulation.

1  
2  
3 However, we will define cerebral autoregulation dysfunction by using a statistical significance  
4 threshold for positive COx correlation values ( $p < 0.0001$ ). Cumulative duration of disturbed  
5 autoregulation will be given by the duration of time spent with a significant positive correlation  
6 throughout the period of neuromonitoring. Computer algorithms for COx will be developed and  
7 implemented blind to the neurological status of enrolled patients.  
8  
9  
10  
11  
12  
13

14  
15 *Estimating optimal MAP:* To calculate the individualized optimal MAP ( $MAP_{OPT}$ ), the computed  
16 COx values will be binned by the average MAP value in their respective moving windows in 5  
17 mmHg bins.<sup>29</sup> An alternative strategy will also be implemented. We will invert the  $MAP_{OPT}$   
18 binning procedure by binning MAP values by their corresponding COx values in sequential 0.05  
19 bins of Spearman correlation coefficients ranging from -1 to +1. This procedure has been  
20 previously described.<sup>18</sup>  
21  
22  
23  
24  
25  
26  
27  
28  
29

30 *Assessment of primary outcome:* Multivariate linear regression will be used to characterize the  
31 association between adequate cerebral perfusion (as measured using duration of time (minutes)  
32 outside of  $MAP_{OPT}$ , mean  $rSO_2$ , and duration of disturbed cerebral autoregulation) and delirium  
33 severity throughout a patient's ICU stay to determine if poor cerebral oxygenation is an  
34 independent predictor of delirium. We will estimate the unadjusted effect of each individual  
35 predictor on delirium severity (i.e., cumulative CAM-7 scores per patient). The simultaneous  
36 multivariate regression model will adjust for the following covariates due to their potential  
37 associations with delirium: a history of hypertension, a history of alcohol abuse, total sedative  
38 dose (in midazolam equivalents), total narcotic dose (in fentanyl equivalents), severity of illness  
39 (APACHE II scores), pre-existing cognitive impairment (CDR score), length of ICU stay, frailty,  
40 (clinical frailty scale) and blood urea nitrogen. The multivariable model will provide the adjusted  
41 regression coefficients after controlling for all predictors included in the model. All covariates  
42  
43  
44  
45  
46  
47  
48  
49  
50  
51  
52  
53  
54  
55  
56  
57  
58  
59  
60

1  
2  
3 included in regression modeling have been chosen *a priori* based on clinical judgment and  
4  
5 previous research.<sup>16,30</sup> Model diagnostics will be conducted to assess the underlying assumptions  
6  
7 of linear regression (i.e., linearity, normally distributed residuals, equal variances, and lack of  
8  
9 multicollinearity) for all models. Multiple imputation strategies will be applied at the time of the  
10  
11 regression modeling to account for any missing data and reduce bias associated with excluding  
12  
13 patients due to partially collected data.  
14  
15

16  
17  
18 *Secondary outcomes:*  
19

20  
21 *Determinants of rSO<sub>2</sub>:* To assess the hemodynamic and physiological determinants of rSO<sub>2</sub> at the  
22  
23 patient level, multiple linear regression will be performed using the patient average of each  
24  
25 variable over the 72-hour data collection period. The following predictors will be included in the  
26  
27 regression model: HR, SpO<sub>2</sub>, MAP, arterial, and venous blood gas data (i.e., pH, pO<sub>2</sub>, and  
28  
29 pCO<sub>2</sub>), central venous oxygen saturation, and Hb concentration. In addition, the multivariate  
30  
31 model will control for the following covariates associated with cerebral perfusion: age,<sup>31</sup> as well  
32  
33 as total sedative, narcotic, and vasopressor dosing. Simultaneous multiple linear regression with  
34  
35 adjustment for all aforementioned covariates will be implemented. As stated for the primary  
36  
37 outcome regression analysis, model diagnostics will be performed. Furthermore, the relationship  
38  
39 between the determinants of the NIRS-derived rSO<sub>2</sub> signal may vary over time (see Figure 6 and  
40  
41 Supplemental Movie 1). Therefore, a repeated measures analysis will also be performed by using  
42  
43 multilevel modeling with 6 observations reflecting each 12-hour period during the 72-hour data  
44  
45 collection period (with time coded as 0 – 5, so the intercept equals baseline/time of enrolment)  
46  
47 nested within each subject. The predictors will be the same as the regression model but allowed  
48  
49 to be time varying across the 6 observation points. This analysis will assess if within patient  
50  
51  
52  
53  
54  
55  
56  
57  
58  
59  
60

1  
2  
3 changes in the predictors correlate with changes in rSO<sub>2</sub>, and if these associations are modified  
4  
5 by fixed patient characteristics, such as age.  
6  
7

8 *Assessing if poor cerebral perfusion during critical illness is a significant predictor of long-term*  
9 *neurological dysfunction among ICU survivors:* Multiple linear regression analysis will be used  
10  
11 to assess if impaired cerebral perfusion (i.e., time below MAP<sub>OPT</sub>, mean rSO<sub>2</sub>, and duration of  
12  
13 disturbed cerebral autoregulation) is associated with RBANS global cognition scores at 3- and  
14  
15 12-months post-ICU discharge. We will use the following clinical covariates collected on  
16  
17 admission (i.e., pre-existing cognitive impairment, age, severity of illness, frailty) and data  
18  
19 collected within the first 72 hours of the patients' ICU stay (i.e., narcotic dosing and  
20  
21 benzodiazepine dosing). All covariates will be adjusted for in separate regression models for the  
22  
23 cognitive outcomes at 3- and 12-months post-ICU discharge. If global cognition is significantly  
24  
25 predicted by the time below MAP<sub>OPT</sub>, we will conduct an exploratory analysis of the RBANS  
26  
27 subdomains of cognition (i.e., delay and immediate memory, language, attention,  
28  
29 visuospatial/constructional) adjusting for the aforementioned covariates to further explore  
30  
31 specific areas of impairment observed among survivors of critical illness. Only patients assessed  
32  
33 at KHSC will undergo KINARM testing, so this data will be assessed with descriptive statistics  
34  
35 only to avoid any potential bias.  
36  
37  
38  
39  
40  
41  
42  
43  
44  
45  
46  
47  
48  
49  
50  
51  
52  
53  
54  
55  
56  
57  
58  
59  
60

## DISCUSSION

This multicentre observational study will extend our preliminary findings of reduced rSO<sub>2</sub> as an independent risk factor for the development of delirium during critical illness. With the proposed larger sample size, we will not only be able to replicate and validate this completely novel finding, but we will also be able to further characterize the physiological determinants of rSO<sub>2</sub> in a representative cohort. Furthermore, this study will have the potential to identify novel pathophysiological mechanism associated with the development of delirium and long-term neurological dysfunction among ICU survivors. These findings will inform the next phase of this research program: a proof-of-principal study, aimed at devising strategies to optimize rSO<sub>2</sub>. It will lay the foundation for a larger interventional study designed to assess whether optimization of rSO<sub>2</sub> can reduce delirium and improve long-term neurological outcomes for patients.

### **Ethics and Dissemination:**

*Risks/Ethical Considerations:* Ethics approval will be obtained prior to the commencement of screening and enrolment at each site. There are no assumed risks associated with the proposed assessment procedures, as this study only involves a small amount of bloodwork, which will only be collected if a central line and arterial line are *already* in place. Furthermore, results from our pilot study demonstrated that non-invasive monitoring of cerebral oxygenation, while using a deferred consent model, does not interfere with patient care or management.<sup>15</sup> Research participants and their SDMs will be informed that enrolment in this study will not affect their care in any way, and that they have the right to refuse participation or withdraw at any time.

*Dissemination of results:* The results of this study will be presented at national meetings of the Canadian Critical Care Trials Group. Prior to submitting any manuscript for publication, it will undergo rigorous internal peer review by this group of critical care experts. Our study group has a long track record of presenting our data at national and international critical care conferences. We anticipate the preliminary results of this research program will also be presented at these conferences (e.g., American Delirium Society). The final study results will be submitted for publication to high impact journals.

**References:**

1. Hutchings, A. *et al.* Evaluation of modernisation of adult critical care services in England: time series and cost effectiveness analysis. *BMJ* **339**, b4353–b4353 (2009).
2. Zimmerman, J. E., Kramer, A. A. & Knaus, W. A. Changes in hospital mortality for United States intensive care unit admissions from 1988 to 2012. *Crit. Care* **17**, R81 (2013).
3. Rawal, G., Yadav, S. & Kumar, R. Post-intensive care syndrome: An overview. *J. Transl. Intern. Med.* **5**, 90–92 (2017).
4. Norman, B. C. *et al.* Employment Outcomes After Critical Illness. *Crit. Care Med.* (2016). doi:10.1097/CCM.0000000000001849
5. Sakusic, A. *et al.* Potentially Modifiable Risk Factors for Long-Term Cognitive Impairment After Critical Illness: A Systematic Review. *Mayo Clin. Proc.* **93**, 68–82 (2018).
6. Pandharipande, P. *et al.* Long-Term Cognitive Impairment after Critical Illness. *N. Engl. J. Med.* **369**, 1306–1316 (2013).
7. Suchyta, M. R., Jephson, A. & Hopkins, R. O. Neurologic Changes during Critical Illness: Brain Imaging Findings and Neurobehavioral Outcomes. *Brain Imaging Behav.* **4**, 22–34 (2010).
8. Wolters, A. E., Slooter, A. J. C., Van Der Kooi, A. W. & Van Dijk, D. Cognitive impairment after intensive care unit admission: A systematic review. *Intensive Care Med.* **39**, 376–386 (2013).
9. Wood, M. D., Maslove, D. M., Muscedere, J., Scott, S. H. & Boyd, J. G. Robotic technology provides objective and quantifiable metrics of neurocognitive functioning in survivors of critical illness: A feasibility study. *J. Crit. Care* **48**, 228–236 (2018).
10. Maldonado, J. R. Acute Brain Failure: Pathophysiology, Diagnosis, Management, and Sequelae of Delirium. *Crit. Care Clin.* **33**, 461–519 (2017).
11. Bendahan, N., Neal, O., Ross-White, A., Muscedere, J. & Boyd, J. G. Relationship Between Near-Infrared Spectroscopy-Derived Cerebral Oxygenation and Delirium in Critically Ill Patients: A Systematic Review. *J. Intensive Care Med.* 885066618807399 (2018). doi:10.1177/0885066618807399
12. McLeod, A. D., Igielman, F., Elwell, C., Cope, M. & Smith, M. Measuring cerebral oxygenation during normobaric hyperoxia: a comparison of tissue microprobes, near-infrared spectroscopy, and jugular venous oximetry in head injury. *Anesth. Analg.* **97**, 851–6 (2003).
13. Taussky, P. *et al.* Validation of frontal near-infrared spectroscopy as noninvasive bedside monitoring for regional cerebral blood flow in brain-injured patients. *Neurosurg. Focus* **32**, E2 (2012).
14. Kim, M. B. *et al.* Estimation of jugular venous O<sub>2</sub> saturation from cerebral oximetry or



- arterial O<sub>2</sub> saturation during isocapnic hypoxia. *J. Clin. Monit. Comput.* (2000). doi:10.1023/A:1009940031063
15. Wood, M. *et al.* Brain Tissue Oxygenation in Patients with Septic Shock: a Feasibility Study. *Can. J. Neurol. Sci.* **43**, 65–73 (2016).
  16. Wood, M. D., Maslove, D. M., Muscedere, J. G., Day, A. G. & Gordon Boyd, J. Low brain tissue oxygenation contributes to the development of delirium in critically ill patients: A prospective observational study. *J. Crit. Care* **41**, 289–295 (2017).
  17. Pfister, D. *et al.* Cerebral perfusion in sepsis-associated delirium. *Crit. Care* **12**, R63 (2008).
  18. Lee, K. F., Wood, M. D., Maslove, D. M., Muscedere, J. G. & Boyd, J. G. Dysfunctional cerebral autoregulation is associated with delirium in critically ill adults. *J. Cereb. Blood Flow Metab.* 0271678X1880308 (2018). doi:10.1177/0271678X18803081
  19. Mehta, S. *et al.* Prevalence, Risk Factors, and Outcomes of Delirium in Mechanically Ventilated Adults. *Crit. Care Med.* **43**, 557–66 (2014).
  20. Rockwood, K. *et al.* A global clinical measure of fitness and frailty in elderly people. *Can. Med. Assoc. J.* **173**, 489–495 (2005).
  21. Ely, E. W. *et al.* Evaluation of delirium in critically ill patients: validation of the Confusion Assessment Method for the Intensive Care Unit (CAM-ICU). *Crit Care Med* **29**, 1370–1379 (2001).
  22. Han, J. H. *et al.* Diagnosing delirium in older emergency department patients: validity and reliability of the delirium triage screen and the brief confusion assessment method. *Ann. Emerg. Med.* **62**, 457–465 (2013).
  23. Khan, B. A. *et al.* The Confusion Assessment Method for the ICU-7 Delirium Severity Scale: A Novel Delirium Severity Instrument for Use in the ICU. *Crit. Care Med.* **45**, 851–857 (2017).
  24. Hughes, C. P., Berg, L., Danziger, W. L., Coben, L. A. & Martin, R. L. A new clinical scale for the staging of dementia. *Br. J. Psychiatry* **140**, 566–72 (1982).
  25. Randolph, C., Tierney, M. C., Mohr, E. & Chase, T. N. The Repeatable Battery for the Assessment of Neuropsychological Status (RBANS): preliminary clinical validity. *J. Clin. Exp. Neuropsychol.* **20**, 310–9 (1998).
  26. Wood, M. D. *et al.* Assessing the relationship between brain tissue oxygenation and neurological dysfunction in critically ill patients : study protocol. *Int J Clin Trials* **3**, 98–105 (2016).
  27. Simmatis, L., Krett, J., Scott, S. H. & Jin, A. Y. Robotic exoskeleton assessment of transient ischemic attack. *PLoS One* **12**, e0188786 (2017).
  28. PASS 15 Power Analysis and Sample Size Software (2017). NCSS, LLC. Kaysville, Utah, USA, [ncss.com/software/pass](http://ncss.com/software/pass).
  29. Sekhon, M. S. *et al.* Using the relationship between brain tissue regional saturation of

- 1  
2  
3 oxygen and mean arterial pressure to determine the optimal mean arterial pressure in  
4 patients following cardiac arrest: A pilot proof-of-concept study. *Resuscitation* **106**, 120–  
5 125 (2016).  
6
- 7  
8 30. Wassenaar, A. *et al.* Multinational development and validation of an early prediction  
9 model for delirium in ICU patients. *Intensive Care Med.* **41**, 1048–1056 (2015).
- 10  
11 31. Buijs, P. C. *et al.* Effect of age on cerebral blood flow: measurement with ungated two-  
12 dimensional phase-contrast MR angiography in 250 adults. *Radiology* **209**, 667–74  
13 (1998).
- 14  
15 32. Coderre, A. M. *et al.* Assessment of upper-limb sensorimotor function of subacute stroke  
16 patients using visually guided reaching. *Neurorehabil. Neural Repair* **24**, 528–541 (2010).
- 17  
18 33. Hawkins, K. M. & Sergio, L. E. Visuomotor Impairments in Older Adults at Increased  
19 Alzheimer's Disease Risk. *J. Alzheimers. Dis.* **42**, 607–621 (2014).
- 20  
21 34. Lowrey, C. R., Jackson, C. PT., Bagg, S. D., Dukelow, S. P., & Scott, S. H. A Novel  
22 Robotic Task for Assessing Impairments in Bimanual Coordination Post-Stroke. *Int. J.*  
23 *Phys. Med. Rehabil.* **s3**, (2014).
- 24  
25 35. Dukelow, S. P. *et al.* Quantitative assessment of limb position sense following stroke.  
26 *Neurorehabil. Neural Repair* **24**, 178–187 (2010).
- 27  
28 36. Tyryshkin, K. *et al.* A robotic object hitting task to quantify sensorimotor impairments in  
29 participants with stroke. *J. Neuroeng. Rehabil.* **11**, 47 (2014).
- 30  
31 37. Bourke, T. C. *et al.* A robot-based behavioural task to quantify impairments in rapid motor  
32 decisions and actions after stroke. *J. Neuroeng. Rehabil.* **13**, 91 (2016).  
33  
34  
35  
36  
37  
38  
39  
40  
41  
42  
43  
44  
45  
46  
47  
48  
49  
50  
51  
52  
53  
54  
55  
56  
57  
58  
59  
60

### Acknowledgments:

The authors would like to thank the study coordinators, Ms. Miranda Hunt, Ms. Ilinca Georgescu, and Mrs. Tracy Boyd, as well as the entire KHSC ICU staff for their continued support of our clinical research. This manuscript underwent an internal peer-review process with the Canadian Critical Care Trials Group, and we are greatly appreciative of the helpful contributions made by both Dr. Lisa Burry and Dr. Pierre Cardinal. We would also like to thank the KINARM technologists, Ms. Simone Appaqaq, Ms. Kim Moore, and Ms. Helen Bretzke.

### List of Abbreviations

APM: Arm Position Matching

BonB: Ball on Bar

bCAM: Brief Confusion Assessment Method

CDR: Clinical Dementia Rating Scale

COx: Cerebral Oximetry Index

Hb: Hemoglobin Concentration

HR: Heart Rate

KHSC: Kingston Health Sciences Centre

KINARM: Kinesiological Instrument for Normal and Altered Reaching Movement

ICU: Intensive Care Unit

MAP: Mean Arterial Pressure

MAP<sub>OPT</sub>: Optimal Mean Arterial Pressure

NIRS: Near-infrared Spectroscopy

OH: Object Hit

OHA: Object Hit and Avoid

pCO<sub>2</sub>: Arterial Partial Pressure of Carbon Dioxide

PICS: Post-intensive Care Syndrome

pO<sub>2</sub>: Arterial Partial Pressure of Oxygen

RASS: Richmond Agitation and Sedation Scale

RBANS: Repeatable Battery for the Assessment of Neuropsychological Status

rSO<sub>2</sub>: Regional Cerebral Oxygenation

1  
2  
3 RVGR: Reverse Visually Guided Reaching  
4

5 SpO<sub>2</sub>: Peripheral Oxygen Saturation  
6

7 SS: Spatial Span  
8

9 SDM: Substitute Decision Maker  
10

11 VGR: Visually Guided Reaching  
12  
13

14  
15 **Authors' contributions:**

16 MDW participated in study design, statistical planning, and drafting of the manuscript.

17 JK participated in study design and drafting of the manuscript.  
18

19 KL participated in study design and drafting of the manuscript.  
20

21 DM participated in study design and drafting of the manuscript.  
22

23 JM participated in study design and drafting of the manuscript.  
24

25 MH participated in study design and drafting of the manuscript.  
26

27 SHS participated in study design and drafting of the manuscript.  
28

29 AD participated in sample size calculations and finalizing of the statistical plan.  
30

31 JAJ participated in statistical planning and drafting of the manuscript.  
32

33 IB participated in study design and drafting of the manuscript.  
34

35 MS participated in study design and drafting of the manuscript.  
36

37 NO participated in study design and drafting of the manuscript.  
38

39 SE participated in study design and drafting of the manuscript.  
40

41 VM participated in study design and drafting of the manuscript.  
42

43 MC participated in study design and drafting of the manuscript.  
44

45 DG participated in study design and drafting of the manuscript.  
46

47 JGB is the primary investigator. He participated in study design and drafting of the manuscript.  
48  
49

50  
51 **Funding statement:**

52  
53 This work was supported by the Physician Services Incorporated and the Southeastern Ontario  
54 Academic Medical Organization New Clinician Scientist Program for which JGB was the  
55  
56  
57  
58  
59

1  
2  
3 recipient. The funding agencies had no role in the design of this study, data collection, or data  
4 analysis.  
5  
6  
7

8 **Competing interests statement.**  
9

10 Mr. Michael D. Wood has nothing to disclose.

11 Ms. Jasmine Khan has nothing to disclose.

12 Dr. Kevin Lee has nothing to disclose.

13 Dr. David Maslove has nothing to disclose.

14 Dr. John Muscedere is the scientific director of the Canadian Frailty Network.

15 Ms. Miranda Hunt has nothing to disclose.

16 Dr. Stephen Scott is the cofounder of BKIN Technologies, the manufacturer of the KINARM  
17 device.

18 Mr. Andrew Day has nothing to disclose.

19 Dr. Jill Jacobson has nothing to disclose.

20 Dr. Ian Ball receives a stipend from the Trillium Gift of Life Network to support his role as a  
21 Regional Medical Lead.

22 Dr. Niamh O'Regan received funding from the Academic Medical Organization of Southwestern  
23 Ontario.

24 Dr. Marat Slessarev receives a stipend from the Trillium Gift of Life Network to support his role  
25 as a Hospital Donation Physician.

26 Dr. Victoria McCredie has nothing to disclose.

27 Dr. Shane English has nothing to disclose.

28 Dr. Donald Griesdale is funded through a Health-Professional Investigator Award from the  
29 Michael Smith Foundation for Health Research.

30 Dr. J. Gordon Boyd receives a stipend from the Trillium Gift of Life Network to support his role  
31 as a Regional Medical Lead.  
32  
33  
34  
35  
36  
37  
38  
39  
40  
41  
42  
43  
44  
45  
46  
47  
48  
49  
50  
51  
52  
53  
54  
55  
56  
57  
58  
59  
60

## Figure Legends:

**Figure 1.** A visual representation of the CONFOCAL2 study design from enrolment to 3- and 12-month follow up assessments.

**Figure 2.** Three-dimensional animated representation of the KINARM End-Point robotic set-up used at 3- and 12-month follow up assessments.

**Figure 3.** Visual representation of the administered KINARM behavioral battery, where panels A-F represent individual tasks. Dark blue lines represent the bimanual robotic limbs, with connected red circles indicating robotic joints which permit movement of the KINARM. *Note.* While each panel includes a view of the participant's arms, subjects do not see their arms throughout task completion. Instead, they are virtually represented as white circles (A-D) or green paddles (E-F). **A.** Spatial Span (SS). Participants are instructed to memorize a sequence (represented as numbered blue squares) on a 3x4 grid. The task begins with a sequence length of 3 and participants must replicate the sequence using their dominant hand. Sequence length is increased/decreased by 1 unit for every correct/incorrect replication, up to a maximum sequence length of 12, with a total of 17 trials. This task assesses visuospatial working memory. **B.** Visually Guided and Reverse Visually Guided Reaching (VGR and RVGR). Participants are instructed to move the robot to one of four targets, indicated by red circles, and back to the home position (i.e., middle target). In VGR, participant's movement (white arrow) is identical to visual feedback (yellow arrow). In RVGR, virtual feedback is mirrored/inverted (blue arrow) to the actual hand position, requiring participants to initiate corrective movements in the opposite direction. This task assesses visuomotor abilities<sup>32</sup> and cognitive override (RVGR).<sup>33</sup> *Note.* Red lines visually represent participant hand paths throughout the entire task. **C.** Ball on Bar (BonB). Participants are instructed to use both hands to balance a virtually represented ball on top of a vertical bar connecting both hands, while sequentially moving to one of four targets (red circles) as quickly and accurately as possible. This task assesses bimanual coordination.<sup>34</sup> *Note.* Red lines represent expected hand path of participant. **D.** Arm Position Matching (APM). The KINARM robot moves the participant's dominant hand to one of four targets (blue circles), with the path to these targets represented by blue lines. Participants are instructed to mirror match the movement with their dominant arm, which assess using proprioception.<sup>35</sup> *Note.* Red lines represent participant's hand path, and red circles represent the target locations. **E.** Object Hit (OH). Participants hands are visually represented as green paddles and they are instructed to hit targets (i.e., red circles) away from themselves. These targets fall from the top of the screen with greater frequency and speed to increase difficulty over time. White arrows indicate movement of the targets toward the participant. This task assesses rapid decision-making, bimanual sensorimotor abilities, and visuospatial attention.<sup>36</sup> **F.** Object Hit and Avoid (OHA). Participants are asked to remember two target shapes and instructed to hit these targets while also avoiding all other objects (i.e., distractors). White arrows indicate movement of the various objects. This task is similar to OH, with additional assessment of higher executive function.<sup>37</sup> *Note.* The participant is briefly shown the two targets at the start of the task and they do not appear on screen throughout task duration.

1  
2  
3 **Figure 4.** A power curve indicating the study sample size, and the respective statistical power, to  
4 assess the primary study outcome. *Note.* Red dots represent the sample size needed for a given  
5 statistical power. The primary sample size was calculated using the following multivariate  
6 regression model parameters: 10 independent variables tested, controlling for 9 additional  
7 covariates, power = 0.90,  $R^2 = 0.050$ ,  $\alpha = 0.05$ , which would require a sample size of 400.  
8  
9

10 **Figure 5A.** Simplified line graph (24 hours instead of the full 72 hour recording period)  
11 illustrating the sliding window correlation between mean arterial pressure and regional brain  
12 tissue oxygenation for an individual patient over a 24 period of recording. *Note.* The black  
13 rectangle represents a 60-minute window that moves forward 1-minute at a time until the  
14 recording period is completed. **B.** Scatter plot illustrating a time dependent positive association  
15 between mean arterial pressure and regional brain tissue oxygenation. *Note.* Black dots represent  
16 data collected for an individual patient over 24 hours, with the blue line representing a linear  
17 model fit to the data, and the grey shaded region representing the 95% confidence interval. **C.**  
18 Scatter plot indicating the time varying association between mean arterial pressure and regional  
19 brain tissue oxygenation represented as the cerebral oximetry index (COx) over an individual  
20 patient's 24-hour recording period. *Note.* A positive Cox values (>.3) represents dysfunctional  
21 cerebral autoregulation, with negative or near zero values indicating intact cerebral  
22 autoregulation.  
23  
24  
25  
26

27 **Figure 6.** Line graph of the high frequency vital sign recordings indicates the highly variable  
28 relationships with regional brain tissue oxygenation over the 72-hour period of recording. *Note.*  
29 The figure represents a single patient's ICU recording.  $rSO_2$  = Regional brain tissue oxygenation;  
30 HR = Heart rate;  $SpO_2$  = Arterial oxygen saturation; artMAP= Mean arterial pressure from an  
31 arterial line.  
32  
33  
34  
35  
36  
37  
38  
39  
40  
41  
42  
43  
44  
45  
46  
47  
48  
49  
50  
51  
52  
53  
54  
55  
56  
57  
58  
59  
60



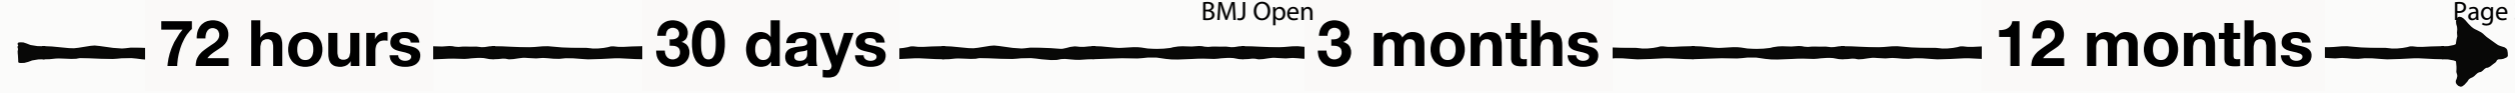

1  
2  
3  
4  
5  
6  
7  
8  
9  
10  
11  
12  
13  
14  
15  
16  
17  
18  
19  
20  
21  
22  
23  
24  
25  
26  
27  
28  
29  
30  
31  
32  
33  
34  
35  
36  
37  
38  
39  
40  
41  
42  
43  
44  
45  
46  
47  
48  
49  
50  
51  
52  
53  
54  
55  
56  
57  
58  
59  
60

**NIRS**

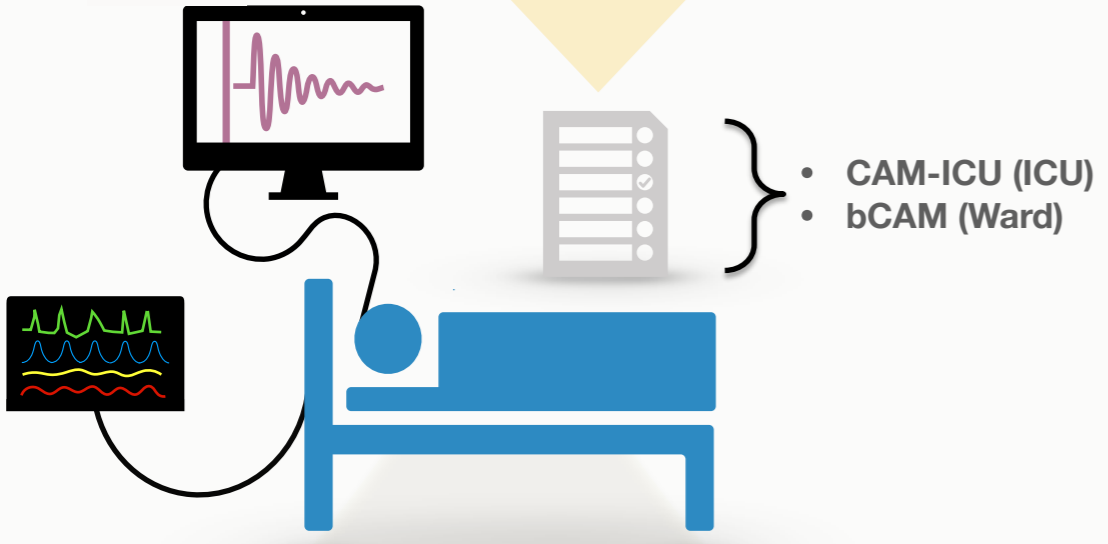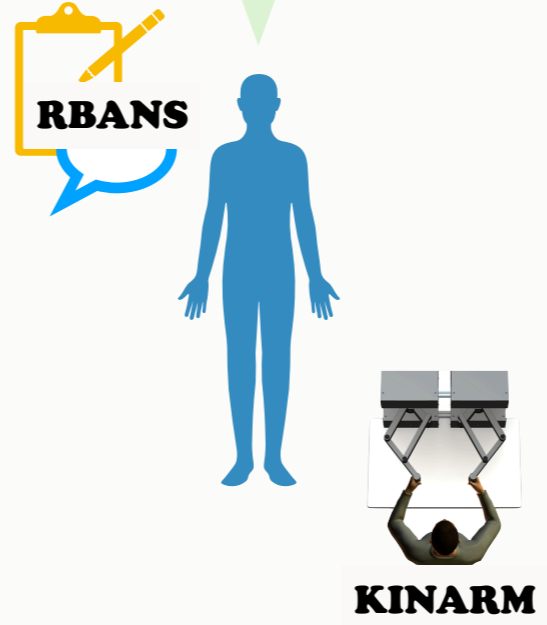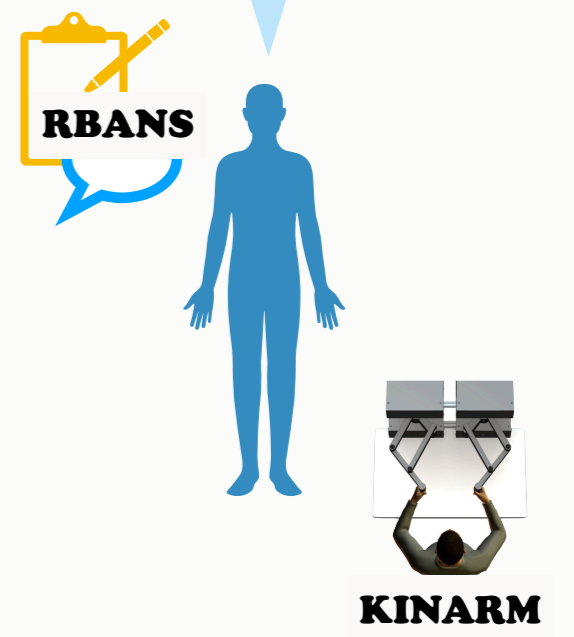

|                                                                     |                                                          |
|---------------------------------------------------------------------|----------------------------------------------------------|
|                                                                     |                                                          |
| >18 years old                                                       | Neurological/<br>neurosurgical<br>admitting<br>diagnosis |
| >24hr<br>mechanical<br>ventilation due<br>to respiratory<br>failure | <24hr life<br>expectancy                                 |
| Shock                                                               | Inability to<br>participate in<br>follow-up              |

**Covariates Collected**

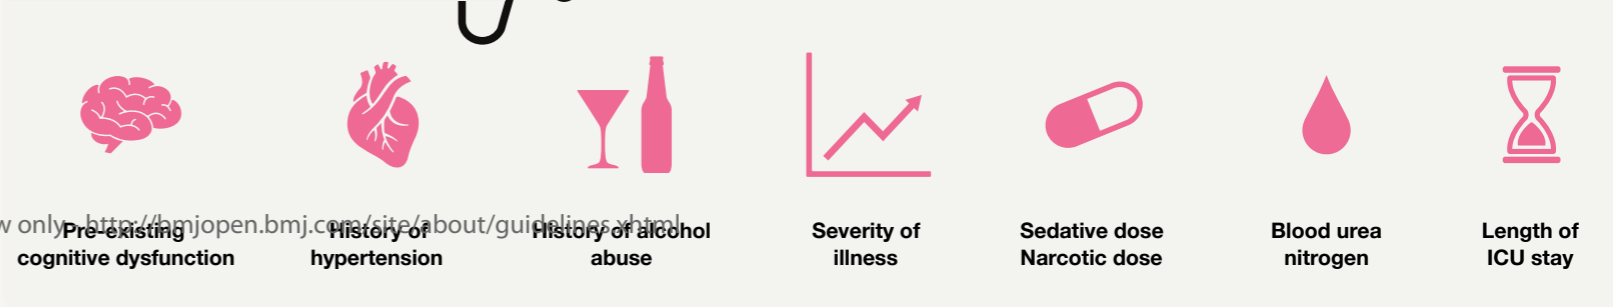



1  
2  
3  
4  
5  
6  
7  
8  
9  
10  
11  
12  
13  
14  
15  
16  
17  
18  
19  
20  
21  
22  
23  
24  
25  
26  
27  
28  
29  
30  
31  
32  
33  
34  
35  
36  
37  
38  
39  
40  
41  
42  
43  
44  
45  
46  
47  
48  
49  
50  
51  
52  
53  
54  
55  
56  
57  
58  
59  
60

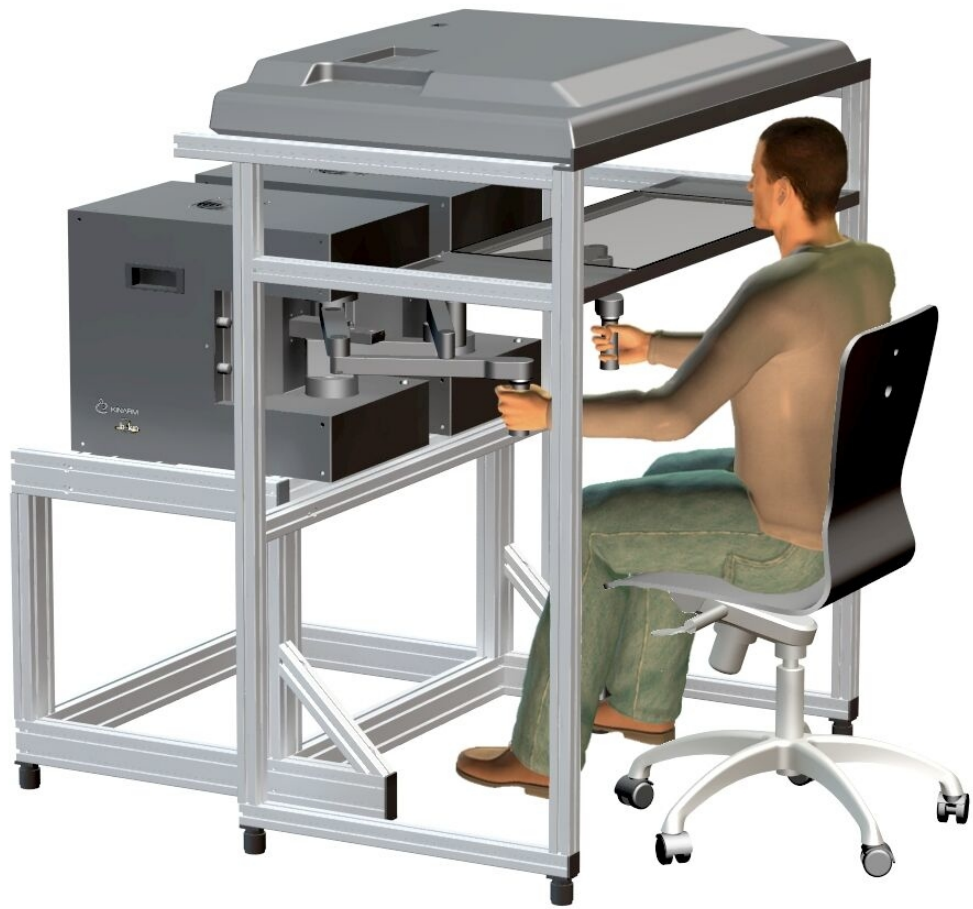

Figure 2. Three-dimensional animated representation of the KINARM End-Point robotic set-up used at 3- and 12-month follow up assessments.

320x299mm (72 x 72 DPI)

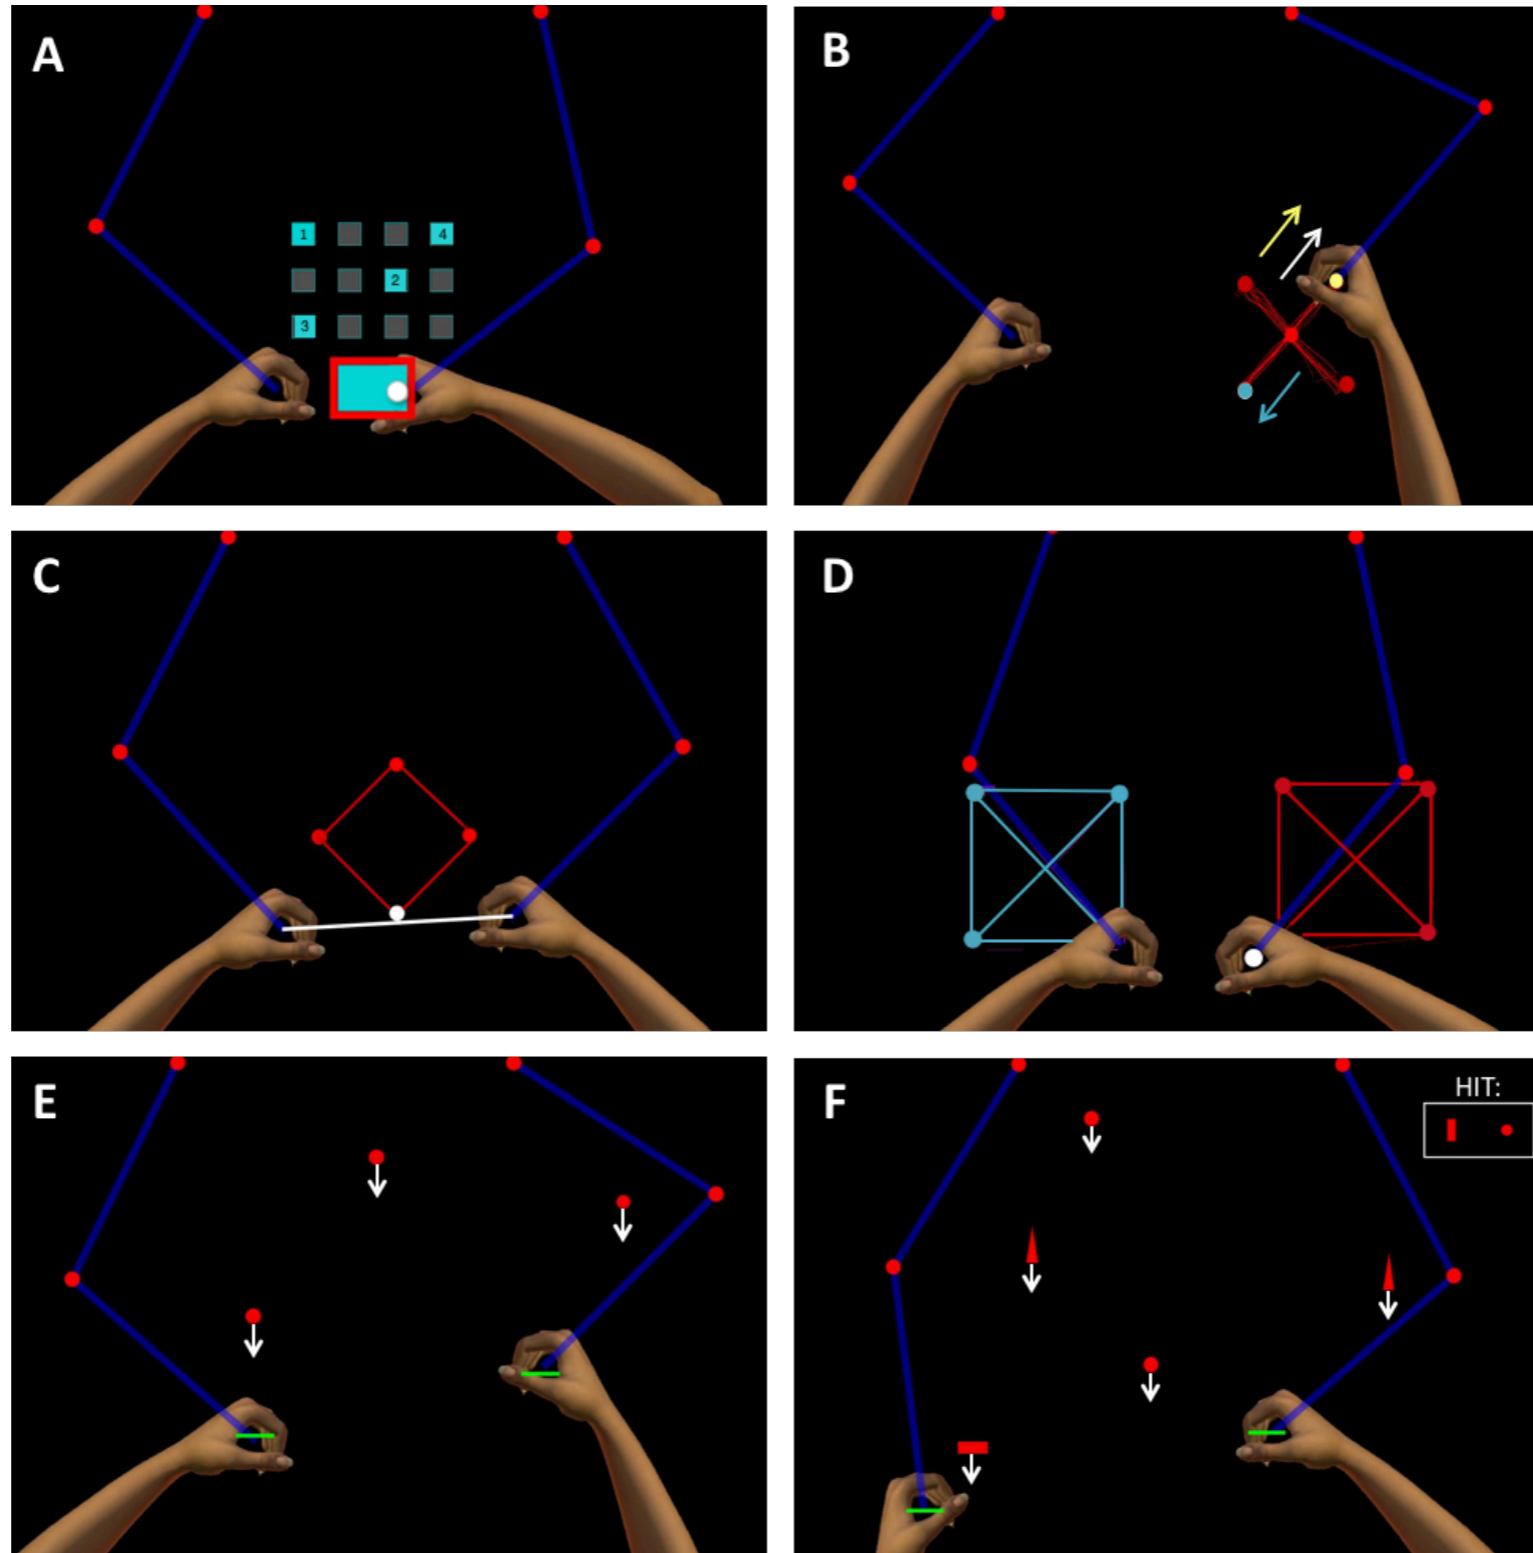

1  
2  
3  
4  
5  
6  
7  
8  
9  
10  
11  
12  
13  
14  
15  
16  
17  
18  
19  
20  
21  
22  
23  
24  
25  
26  
27  
28  
29  
30  
31  
32  
33  
34  
35  
36  
37  
38  
39  
40  
41  
42  
43  
44  
45  
46  
47  
48  
49  
50  
51  
52  
53  
54  
55  
56  
57  
58  
59  
60

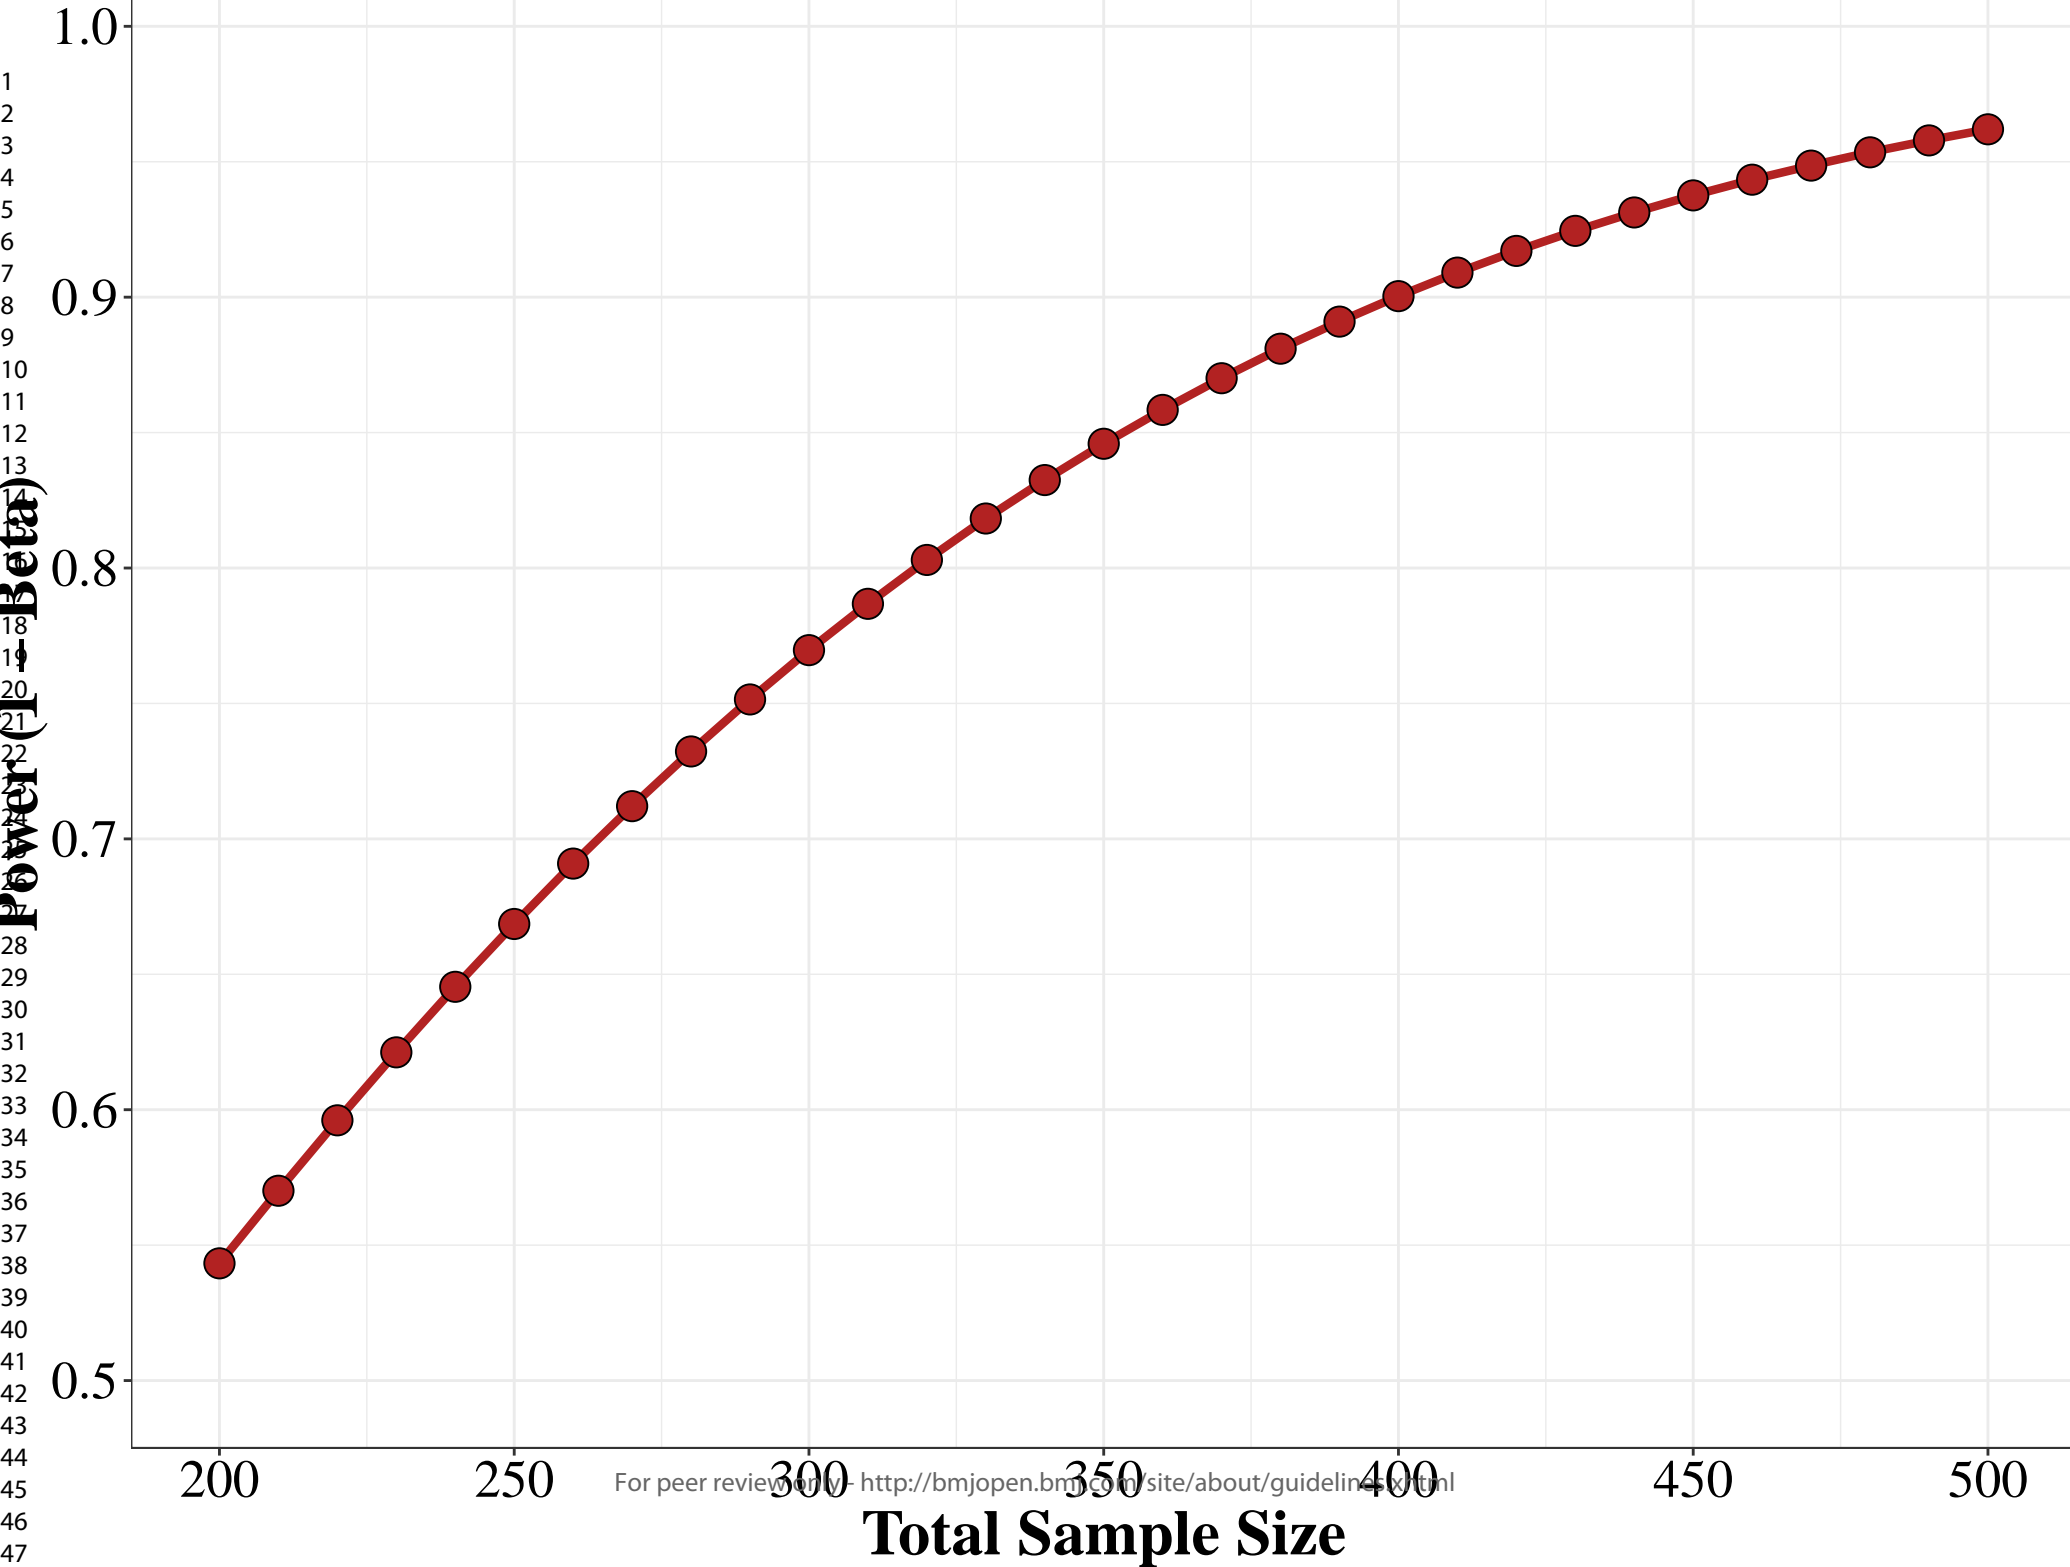

1  
2  
3  
4  
5  
6  
7  
8  
9  
10  
11  
12  
13  
14  
15  
16  
17  
18  
19  
20  
21  
22  
23  
24  
25  
26  
27  
28  
29  
30  
31  
32  
33  
34  
35  
36  
37  
38  
39  
40  
41  
42  
43  
44  
45  
46  
47

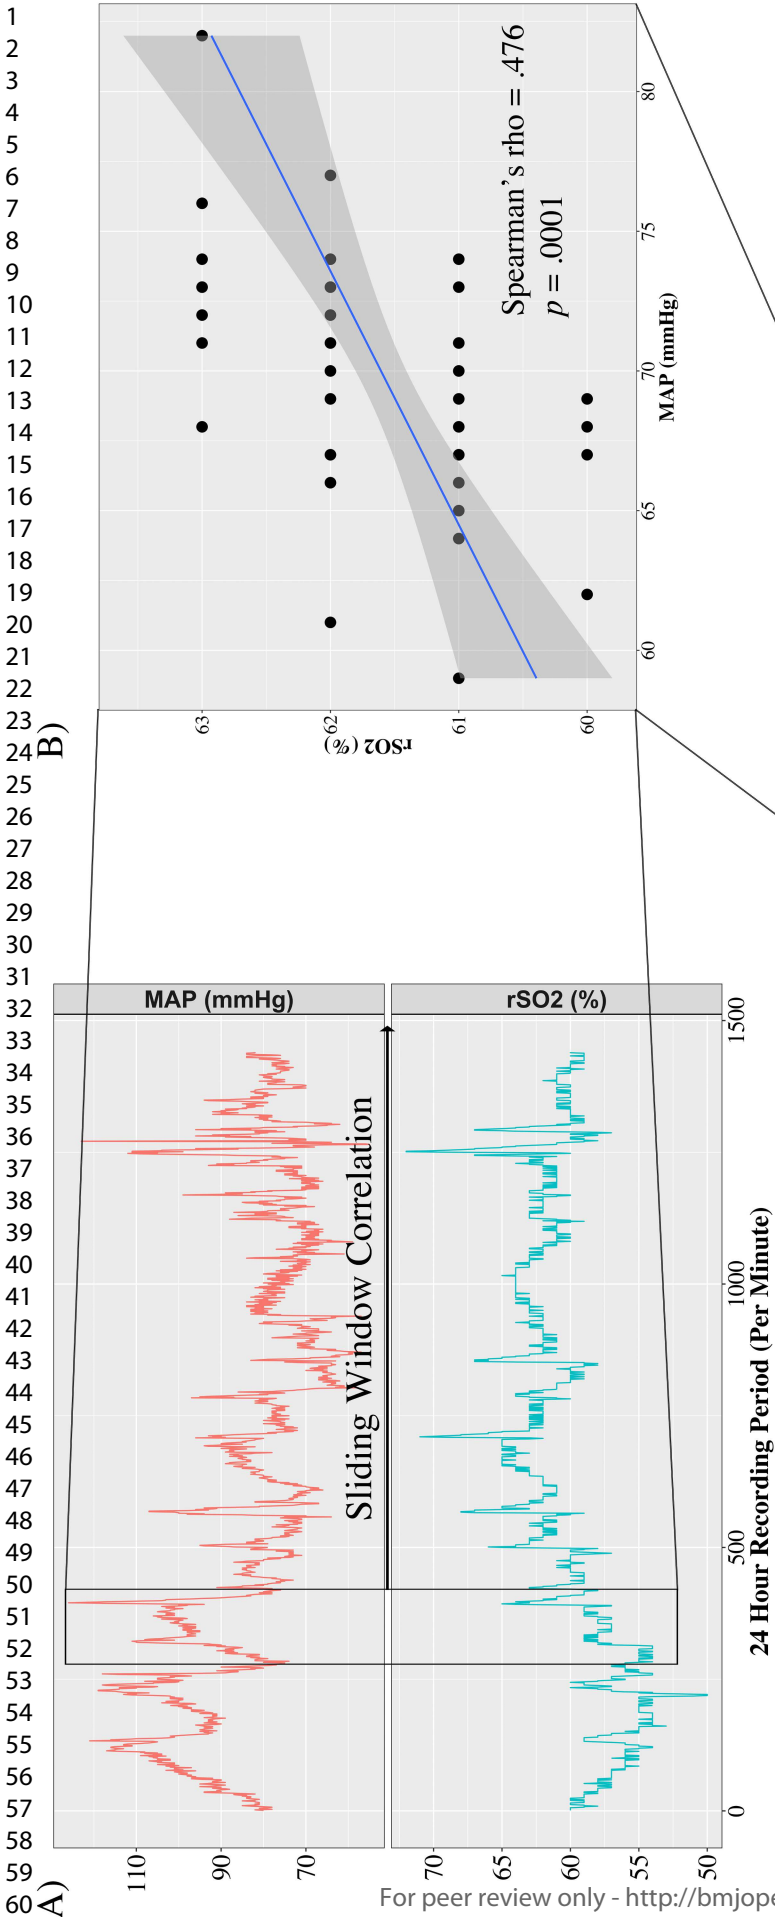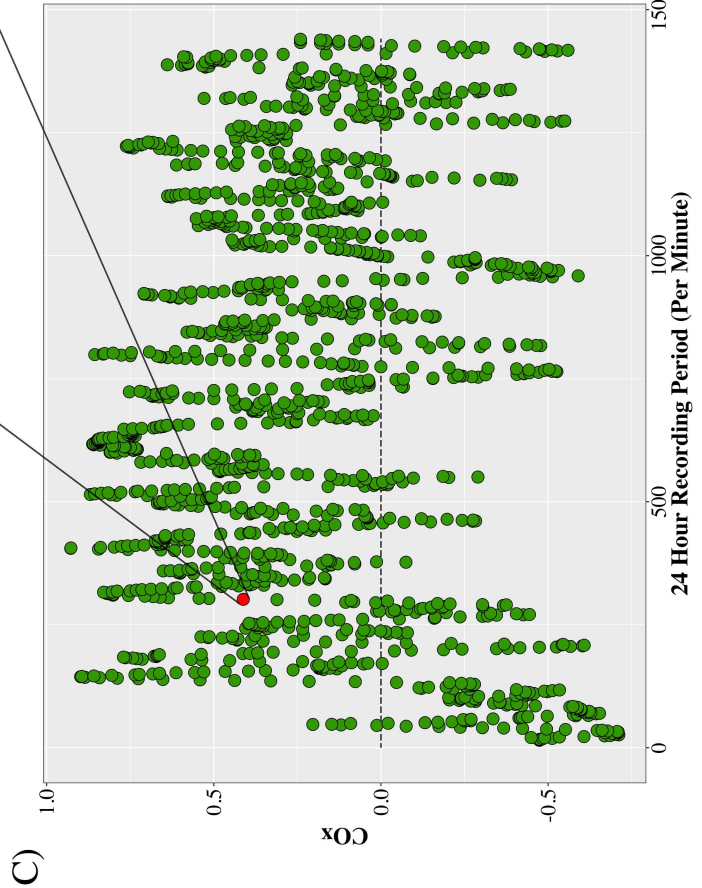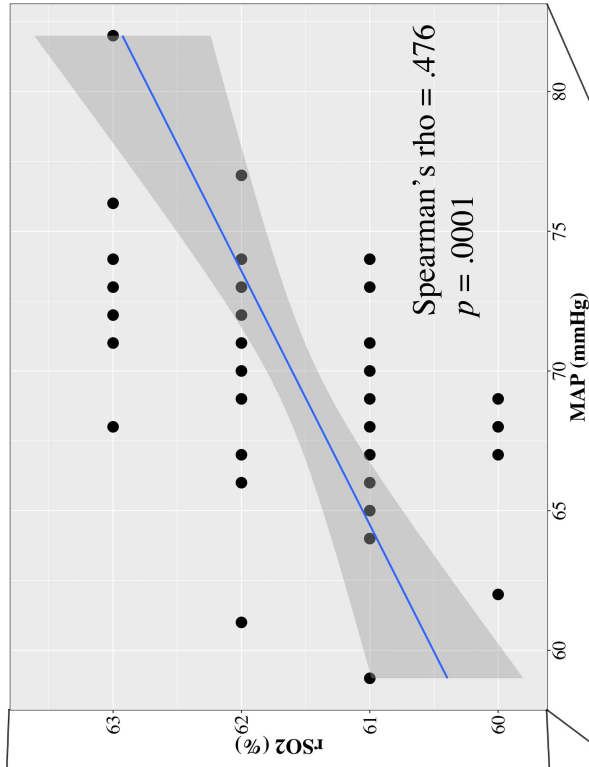

Enrolment 24 Hours 48 Hours 72 Hours

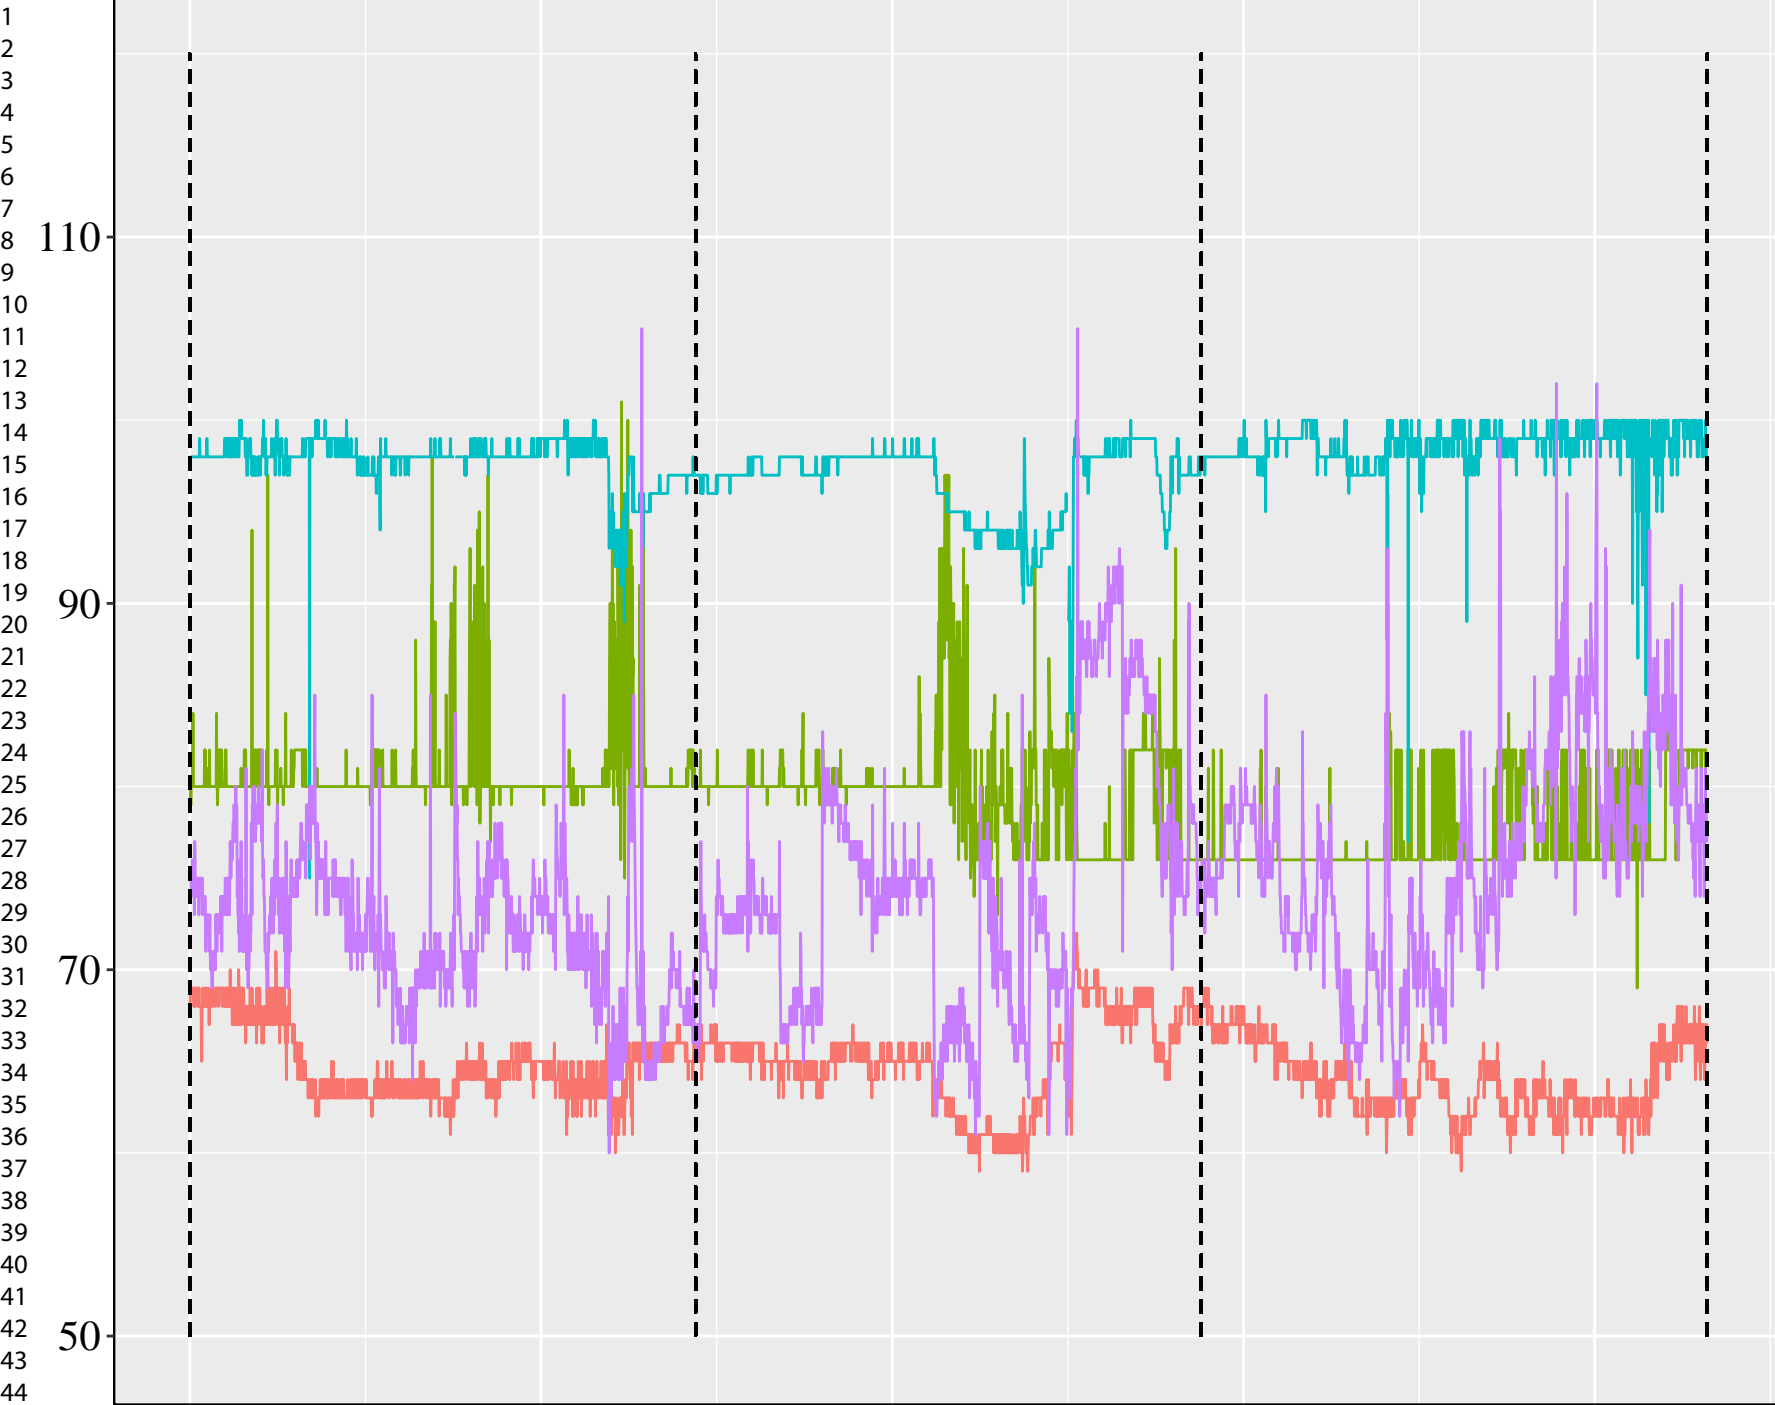

**Variables**

- rSO2 (%)
- HR (bpm)
- SpO2 (%)
- artMAP (mmHg)

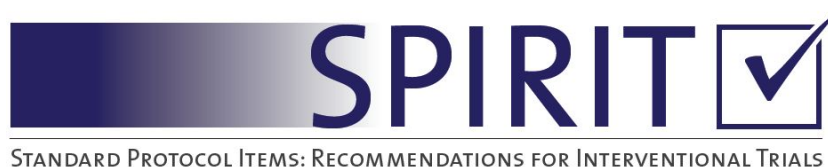

SPIRIT 2013 Checklist: Recommended items to address in a clinical trial protocol and related documents\*

| Section/item                      | Item No | Description                                                                                                                                                                                                                                                                              | Page Number on which item is reported |
|-----------------------------------|---------|------------------------------------------------------------------------------------------------------------------------------------------------------------------------------------------------------------------------------------------------------------------------------------------|---------------------------------------|
| <b>Administrative information</b> |         |                                                                                                                                                                                                                                                                                          |                                       |
| Title                             | 1       | Descriptive title identifying the study design, population, interventions, and, if applicable, trial acronym                                                                                                                                                                             | 1                                     |
| Trial registration                | 2a      | Trial identifier and registry name. If not yet registered, name of intended registry                                                                                                                                                                                                     | 4                                     |
|                                   | 2b      | All items from the World Health Organization Trial Registration Data Set                                                                                                                                                                                                                 | N/A                                   |
| Protocol version                  | 3       | Date and version identifier                                                                                                                                                                                                                                                              | N/A                                   |
| Funding                           | 4       | Sources and types of financial, material, and other support                                                                                                                                                                                                                              | 25-26                                 |
| Roles and responsibilities        | 5a      | Names, affiliations, and roles of protocol contributors                                                                                                                                                                                                                                  | 1-2,25                                |
|                                   | 5b      | Name and contact information for the trial sponsor                                                                                                                                                                                                                                       | 1                                     |
|                                   | 5c      | Role of study sponsor and funders, if any, in study design; collection, management, analysis, and interpretation of data; writing of the report; and the decision to submit the report for publication, including whether they will have ultimate authority over any of these activities | 25-26                                 |
|                                   | 5d      | Composition, roles, and responsibilities of the coordinating centre, steering committee, endpoint adjudication committee, data management team, and other individuals or groups overseeing the trial, if applicable (see Item 21a for data monitoring committee)                         | 9-10                                  |
| <b>Introduction</b>               |         |                                                                                                                                                                                                                                                                                          |                                       |

|                                                           |     |                                                                                                                                                                                                                                                                                                                                                                                |       |
|-----------------------------------------------------------|-----|--------------------------------------------------------------------------------------------------------------------------------------------------------------------------------------------------------------------------------------------------------------------------------------------------------------------------------------------------------------------------------|-------|
| Background and rationale                                  | 6a  | Description of research question and justification for undertaking the trial, including summary of relevant studies (published and unpublished) examining benefits and harms for each intervention                                                                                                                                                                             | 6-7   |
|                                                           | 6b  | Explanation for choice of comparators                                                                                                                                                                                                                                                                                                                                          | 6-7   |
| Objectives                                                | 7   | Specific objectives or hypotheses                                                                                                                                                                                                                                                                                                                                              | 7     |
| Trial design                                              | 8   | Description of trial design including type of trial (eg, parallel group, crossover, factorial, single group), allocation ratio, and framework (eg, superiority, equivalence, noninferiority, exploratory)                                                                                                                                                                      | 7     |
| <b>Methods: Participants, interventions, and outcomes</b> |     |                                                                                                                                                                                                                                                                                                                                                                                |       |
| Study setting                                             | 9   | Description of study settings (eg, community clinic, academic hospital) and list of countries where data will be collected. Reference to where list of study sites can be obtained                                                                                                                                                                                             | 8     |
| Eligibility criteria                                      | 10  | Inclusion and exclusion criteria for participants. If applicable, eligibility criteria for study centres and individuals who will perform the interventions (eg, surgeons, psychotherapists)                                                                                                                                                                                   | 8     |
| Interventions                                             | 11a | Interventions for each group with sufficient detail to allow replication, including how and when they will be administered                                                                                                                                                                                                                                                     | N/A   |
|                                                           | 11b | Criteria for discontinuing or modifying allocated interventions for a given trial participant (eg, drug dose change in response to harms, participant request, or improving/worsening disease)                                                                                                                                                                                 | N/A   |
|                                                           | 11c | Strategies to improve adherence to intervention protocols, and any procedures for monitoring adherence (eg, drug tablet return, laboratory tests)                                                                                                                                                                                                                              | N/A   |
|                                                           | 11d | Relevant concomitant care and interventions that are permitted or prohibited during the trial                                                                                                                                                                                                                                                                                  | N/A   |
| Outcomes                                                  | 12  | Primary, secondary, and other outcomes, including the specific measurement variable (eg, systolic blood pressure), analysis metric (eg, change from baseline, final value, time to event), method of aggregation (eg, median, proportion), and time point for each outcome. Explanation of the clinical relevance of chosen efficacy and harm outcomes is strongly recommended | 16-18 |



|                                                                     |     |                                                                                                                                                                                                                                                                                                                                                          |       |
|---------------------------------------------------------------------|-----|----------------------------------------------------------------------------------------------------------------------------------------------------------------------------------------------------------------------------------------------------------------------------------------------------------------------------------------------------------|-------|
| Participant timeline                                                | 13  | Time schedule of enrolment, interventions (including any run-ins and washouts), assessments, and visits for participants. A schematic diagram is highly recommended (see Figure)                                                                                                                                                                         | 10-13 |
| Sample size                                                         | 14  | Estimated number of participants needed to achieve study objectives and how it was determined, including clinical and statistical assumptions supporting any sample size calculations                                                                                                                                                                    | 14-15 |
| Recruitment                                                         | 15  | Strategies for achieving adequate participant enrolment to reach target sample size                                                                                                                                                                                                                                                                      | 14-15 |
| <b>Methods: Assignment of interventions (for controlled trials)</b> |     |                                                                                                                                                                                                                                                                                                                                                          |       |
| Allocation:                                                         |     |                                                                                                                                                                                                                                                                                                                                                          |       |
| Sequence generation                                                 | 16a | Method of generating the allocation sequence (eg, computer-generated random numbers), and list of any factors for stratification. To reduce predictability of a random sequence, details of any planned restriction (eg, blocking) should be provided in a separate document that is unavailable to those who enrol participants or assign interventions | N/A   |
| Allocation concealment mechanism                                    | 16b | Mechanism of implementing the allocation sequence (eg, central telephone; sequentially numbered, opaque, sealed envelopes), describing any steps to conceal the sequence until interventions are assigned                                                                                                                                                | N/A   |
| Implementation                                                      | 16c | Who will generate the allocation sequence, who will enrol participants, and who will assign participants to interventions                                                                                                                                                                                                                                | N/A   |
| Blinding (masking)                                                  | 17a | Who will be blinded after assignment to interventions (eg, trial participants, care providers, outcome assessors, data analysts), and how                                                                                                                                                                                                                | N/A   |
|                                                                     | 17b | If blinded, circumstances under which unblinding is permissible, and procedure for revealing a participant's allocated intervention during the trial                                                                                                                                                                                                     | N/A   |
| <b>Methods: Data collection, management, and analysis</b>           |     |                                                                                                                                                                                                                                                                                                                                                          |       |



|                                                          |                            |     |                                                                                                                                                                                                                                                                                                                                                                                                              |       |
|----------------------------------------------------------|----------------------------|-----|--------------------------------------------------------------------------------------------------------------------------------------------------------------------------------------------------------------------------------------------------------------------------------------------------------------------------------------------------------------------------------------------------------------|-------|
| 1<br>2<br>3<br>4<br>5<br>6<br>7<br>8<br>9<br>10<br>11    | Data collection methods    | 18a | Plans for assessment and collection of outcome, baseline, and other trial data, including any related processes to promote data quality (eg, duplicate measurements, training of assessors) and a description of study instruments (eg, questionnaires, laboratory tests) along with their reliability and validity, if known. Reference to where data collection forms can be found, if not in the protocol | 10-13 |
| 12<br>13<br>14<br>15<br>16<br>17                         |                            | 18b | Plans to promote participant retention and complete follow-up, including list of any outcome data to be collected for participants who discontinue or deviate from intervention protocols                                                                                                                                                                                                                    | 14-15 |
| 18<br>19<br>20<br>21<br>22<br>23<br>24<br>25             | Data management            | 19  | Plans for data entry, coding, security, and storage, including any related processes to promote data quality (eg, double data entry; range checks for data values). Reference to where details of data management procedures can be found, if not in the protocol                                                                                                                                            | 8-10  |
| 26<br>27<br>28<br>29<br>30<br>31                         | Statistical methods        | 20a | Statistical methods for analysing primary and secondary outcomes. Reference to where other details of the statistical analysis plan can be found, if not in the protocol                                                                                                                                                                                                                                     | 15-18 |
| 32<br>33<br>34                                           |                            | 20b | Methods for any additional analyses (eg, subgroup and adjusted analyses)                                                                                                                                                                                                                                                                                                                                     | 15-18 |
| 35<br>36<br>37<br>38<br>39<br>40                         |                            | 20c | Definition of analysis population relating to protocol non-adherence (eg, as randomised analysis), and any statistical methods to handle missing data (eg, multiple imputation)                                                                                                                                                                                                                              | 15-18 |
| 41<br>42                                                 | <b>Methods: Monitoring</b> |     |                                                                                                                                                                                                                                                                                                                                                                                                              |       |
| 43<br>44<br>45<br>46<br>47<br>48<br>49<br>50<br>51<br>52 | Data monitoring            | 21a | Composition of data monitoring committee (DMC); summary of its role and reporting structure; statement of whether it is independent from the sponsor and competing interests; and reference to where further details about its charter can be found, if not in the protocol. Alternatively, an explanation of why a DMC is not needed                                                                        | N/A   |
| 53<br>54<br>55<br>56<br>57<br>58<br>59<br>60             |                            | 21b | Description of any interim analyses and stopping guidelines, including who will have access to these interim results and make the final decision to terminate the trial                                                                                                                                                                                                                                      | N/A   |

|                                 |     |                                                                                                                                                                                                                                                                                     |      |
|---------------------------------|-----|-------------------------------------------------------------------------------------------------------------------------------------------------------------------------------------------------------------------------------------------------------------------------------------|------|
| Harms                           | 22  | Plans for collecting, assessing, reporting, and managing solicited and spontaneously reported adverse events and other unintended effects of trial interventions or trial conduct                                                                                                   | 20   |
| Auditing                        | 23  | Frequency and procedures for auditing trial conduct, if any, and whether the process will be independent from investigators and the sponsor                                                                                                                                         | N/A  |
| <b>Ethics and dissemination</b> |     |                                                                                                                                                                                                                                                                                     |      |
| Research ethics approval        | 24  | Plans for seeking research ethics committee/institutional review board (REC/IRB) approval                                                                                                                                                                                           | 9,20 |
| Protocol amendments             | 25  | Plans for communicating important protocol modifications (eg, changes to eligibility criteria, outcomes, analyses) to relevant parties (eg, investigators, REC/IRBs, trial participants, trial registries, journals, regulators)                                                    | N/A  |
| Consent or assent               | 26a | Who will obtain informed consent or assent from potential trial participants or authorised surrogates, and how (see Item 32)                                                                                                                                                        | 9-10 |
|                                 | 26b | Additional consent provisions for collection and use of participant data and biological specimens in ancillary studies, if applicable                                                                                                                                               | N/A  |
| Confidentiality                 | 27  | How personal information about potential and enrolled participants will be collected, shared, and maintained in order to protect confidentiality before, during, and after the trial                                                                                                | 9-10 |
| Declaration of interests        | 28  | Financial and other competing interests for principal investigators for the overall trial and each study site                                                                                                                                                                       | 26   |
| Access to data                  | 29  | Statement of who will have access to the final trial dataset, and disclosure of contractual agreements that limit such access for investigators                                                                                                                                     | 10   |
| Ancillary and post-trial care   | 30  | Provisions, if any, for ancillary and post-trial care, and for compensation to those who suffer harm from trial participation                                                                                                                                                       | N/A  |
| Dissemination policy            | 31a | Plans for investigators and sponsor to communicate trial results to participants, healthcare professionals, the public, and other relevant groups (eg, via publication, reporting in results databases, or other data sharing arrangements), including any publication restrictions | 20   |

|                            |     |                                                                                                                                                                                                |     |
|----------------------------|-----|------------------------------------------------------------------------------------------------------------------------------------------------------------------------------------------------|-----|
|                            | 31b | Authorship eligibility guidelines and any intended use of professional writers                                                                                                                 | 20  |
|                            | 31c | Plans, if any, for granting public access to the full protocol, participant-level dataset, and statistical code                                                                                | 20  |
| <b>Appendices</b>          |     |                                                                                                                                                                                                |     |
| Informed consent materials | 32  | Model consent form and other related documentation given to participants and authorised surrogates                                                                                             | N/A |
| Biological specimens       | 33  | Plans for collection, laboratory evaluation, and storage of biological specimens for genetic or molecular analysis in the current trial and for future use in ancillary studies, if applicable | N/A |

\*It is strongly recommended that this checklist be read in conjunction with the SPIRIT 2013 Explanation & Elaboration for important clarification on the items. Amendments to the protocol should be tracked and dated. The SPIRIT checklist is copyrighted by the SPIRIT Group under the Creative Commons "[Attribution-NonCommercial-NoDerivs 3.0 Unported](https://creativecommons.org/licenses/by-nc-nd/3.0/)" license.

# BMJ Open

## Assessing the relationship between near-infrared spectroscopy derived regional cerebral oxygenation and neurological dysfunction in critically ill adults: a prospective observational multi-centre protocol, on behalf of the Canadian Critical Care Trials Group

|                                                                                                                                                         |                                                                                                                                                                                                                                                                                                                                                                                                                                                                                                                                                                                                                                                                                                                                                                                                                                                                                                                                                                                                                                                                                                                                                                                                                                                                                                                                                                                                |
|---------------------------------------------------------------------------------------------------------------------------------------------------------|------------------------------------------------------------------------------------------------------------------------------------------------------------------------------------------------------------------------------------------------------------------------------------------------------------------------------------------------------------------------------------------------------------------------------------------------------------------------------------------------------------------------------------------------------------------------------------------------------------------------------------------------------------------------------------------------------------------------------------------------------------------------------------------------------------------------------------------------------------------------------------------------------------------------------------------------------------------------------------------------------------------------------------------------------------------------------------------------------------------------------------------------------------------------------------------------------------------------------------------------------------------------------------------------------------------------------------------------------------------------------------------------|
| Journal:                                                                                                                                                | <i>BMJ Open</i>                                                                                                                                                                                                                                                                                                                                                                                                                                                                                                                                                                                                                                                                                                                                                                                                                                                                                                                                                                                                                                                                                                                                                                                                                                                                                                                                                                                |
| Manuscript ID                                                                                                                                           | bmjopen-2019-029189.R1                                                                                                                                                                                                                                                                                                                                                                                                                                                                                                                                                                                                                                                                                                                                                                                                                                                                                                                                                                                                                                                                                                                                                                                                                                                                                                                                                                         |
| Article Type:                                                                                                                                           | Protocol                                                                                                                                                                                                                                                                                                                                                                                                                                                                                                                                                                                                                                                                                                                                                                                                                                                                                                                                                                                                                                                                                                                                                                                                                                                                                                                                                                                       |
| Date Submitted by the Author:                                                                                                                           | 03-Apr-2019                                                                                                                                                                                                                                                                                                                                                                                                                                                                                                                                                                                                                                                                                                                                                                                                                                                                                                                                                                                                                                                                                                                                                                                                                                                                                                                                                                                    |
| Complete List of Authors:                                                                                                                               | Wood, Michael; Queen's University, Centre For Neuroscience Studies<br>Khan, Jasmine; Queen's University, Centre for Neuroscience Studies<br>Lee, Kevin; Queen's Univeristy, School of Medicine<br>Maslove, David M; Queen's University , Critical Care Medicine<br>Muscedere, John; Kingston General Hospital, Critical Care Medicine<br>Hunt, Miranda; Queen's University, Critical Care Medicine<br>Scott, Stephen; Queen's University, Centre for Neuroscience Studies<br>Day, Andrew ; Queen's Unversity, Department of Community health and Epidemiology and CERU<br>Jacobson, Jill; Queen's University, Psychology<br>Ball, Ian; London Health Sciences Centre, Medicine<br>Slessarev, Marat; Western University, Medicine, Division of Geriatric Medicine<br>O'Regan, Niamh; Western University, Medicine, Division of Geriatric Medicine<br>English, Shane; University of Ottawa, Medicine (Critical Care); Ottawa Hospital Research Institute, Clinical Epidemiology Program<br>McCredie, Victoria; University of Toronto; Toronto Western Hospital, University Health Network, Medicine; Critical Care<br>Chasse, Michaël; Centre Hospitalier de L'Universite de Montreal, Medicine (Critical Care)<br>Griesdale, Donald; University of British Columbia, Department of Anesthesiology, Pharmacology & Therapeutics<br>Boyd, John; Kingston General Hospital, Critical Care Medicine |
| <b>Primary Subject Heading</b>:                                                                                                                         | Intensive care                                                                                                                                                                                                                                                                                                                                                                                                                                                                                                                                                                                                                                                                                                                                                                                                                                                                                                                                                                                                                                                                                                                                                                                                                                                                                                                                                                                 |
| Secondary Subject Heading:                                                                                                                              | Neurology                                                                                                                                                                                                                                                                                                                                                                                                                                                                                                                                                                                                                                                                                                                                                                                                                                                                                                                                                                                                                                                                                                                                                                                                                                                                                                                                                                                      |
| Keywords:                                                                                                                                               | Near-infrared spectroscopy, Cerebral autoregulation, KINARM, Delirium, Post-intensive care syndrome, RBANS                                                                                                                                                                                                                                                                                                                                                                                                                                                                                                                                                                                                                                                                                                                                                                                                                                                                                                                                                                                                                                                                                                                                                                                                                                                                                     |
| Note: The following files were submitted by the author for peer review, but cannot be converted to PDF. You must view these files (e.g. movies) online. |                                                                                                                                                                                                                                                                                                                                                                                                                                                                                                                                                                                                                                                                                                                                                                                                                                                                                                                                                                                                                                                                                                                                                                                                                                                                                                                                                                                                |

1  
2  
3  
4  
5  
6  
7  
8  
9  
10  
11  
12  
13  
14  
15  
16  
17  
18  
19  
20  
21  
22  
23  
24  
25  
26  
27  
28  
29  
30  
31  
32  
33  
34  
35  
36  
37  
38  
39  
40  
41  
42  
43  
44  
45  
46  
47  
48  
49  
50  
51  
52  
53  
54  
55  
56  
57  
58  
59  
60

Supplemental Figure 1.gif

SCHOLARONE™  
Manuscripts

1  
2  
3  
4 1  
5 2 Title: Assessing the relationship between near-infrared spectroscopy derived  
6 3 regional cerebral oxygenation and neurological dysfunction in critically ill  
7 4 adults: a prospective observational multi-centre protocol, on behalf of the  
8 5 Canadian Critical Care Trials Group  
9 6  
10 7

11 8 Authors: The Cerebral Oxygenation and Neurological Outcomes Following  
12 9 Critical Illness (CONFOCAL) Research Group  
13 10  
14 11

15 12 Michael D. Wood, BA<sup>1</sup>, Jasmine Khan, BS<sup>1</sup>, Kevin F. H. Lee, PhD<sup>2</sup>,  
16 13 David Maslove, MSc, MD<sup>3,4</sup>, John Muscedere, MD<sup>3</sup>, Miranda Hunt, BA<sup>3</sup>  
17 14 Stephen H. Scott, PhD<sup>1</sup>, Andrew G. Day, MSc<sup>5</sup>, Jill A. Jacobson, PhD<sup>6</sup>  
18 15 Ian Ball, MD, MSc<sup>7</sup>, Marat Slessarev, MD, MSc<sup>7</sup>, Niamh O'Regan, MB  
19 16 BCh BAO, PhD<sup>7</sup>, Shane English, MD, MSc<sup>8,9</sup>, Victoria  
20 17 McCredie, MBChB, PhD<sup>10,11</sup>, Michael Chasse, MD, PhD<sup>12</sup>, Donald  
21 18 Griesdale, MD, MPH<sup>13</sup>, J. Gordon Boyd, MD, PhD<sup>1,3,4</sup>  
22 19  
23 20

24 21 Affiliations: <sup>1</sup>Centre for Neuroscience Studies, Queen's University, Kingston, ON,  
25 22 Canada  
26 23 <sup>2</sup>School of Medicine, Queen's University, Kingston, ON, Canada  
27 24 <sup>3</sup>Dept. of Critical Care Medicine, Queen's University, Kingston, ON,  
28 25 Canada  
29 26 <sup>4</sup>Dept. of Medicine, Queen's University, Kingston, ON, Canada  
30 27 <sup>5</sup>Kingston General Hospital Research Institute, Kingston, ON, Canada  
31 28 <sup>6</sup>Dept. of Psychology, Queen's University, Kingston, ON, Canada  
32 29 <sup>7</sup>Dept. of Medicine, Division of Geriatric Medicine, Western University,  
33 30 London, ON, Canada  
34 31 <sup>8</sup> Dept. of Medicine (Critical Care), University of Ottawa, Ottawa, ON,  
35 32 Canada  
36 33 <sup>9</sup>Clinical Epidemiology Program, Ottawa Hospital Research  
37 34 Institute, Ottawa ON, Canada  
38 35 <sup>10</sup>Interdepartmental Division of Critical Care Medicine, Department of  
39 36 Medicine, University of Toronto, Toronto, ON  
40 37 <sup>11</sup>Toronto Western Hospital, University Health Network, Toronto, ON  
41 38 <sup>12</sup> Dept. of Medicine (Critical Care), Université de Montreal, Montreal,  
42 39 QC, Canada  
43 40 <sup>13</sup>Department of Anesthesiology, Pharmacology & Therapeutics,  
44 41 University of British Columbia, Vancouver, BC, Canada  
45 42  
46 43

47 44 Corresponding  
48 45 Author:  
49 46

50 47 J. Gordon Boyd, MD, PhD, FRCPC  
51 48 Associate Professor  
52 49 Dept. of Critical Care Medicine  
53 50 Davies 2, Kingston General Hospital  
54 51 76 Stuart Street, Kingston, ON, Canada K7L 2V7  
55 52 Tel: 613-549-6666 X 6228  
56 53  
57 54  
58 55  
59 56  
60 57

1  
2  
3  
4  
5  
6  
7  
8  
9  
10  
11  
12  
13  
14  
15  
16  
17  
18  
19  
20  
21  
22  
23  
24  
25  
26  
27  
28  
29  
30  
31  
32  
33  
34  
35  
36  
37  
38  
39  
40  
41  
42  
43  
44  
45  
46  
47  
48  
49  
50  
51  
52  
53  
54  
55  
56  
57  
58  
59  
60

Email: [gordon.boyd@kingstonhsc.ca](mailto:gordon.boyd@kingstonhsc.ca)

For peer review only

**Abstract:**

*Introduction:* Survivors of critical illness frequently exhibit acute and chronic neurological complications. The underlying etiology of this dysfunction remains unknown but may be associated with cerebral ischemia. This study will use near-infrared spectroscopy (NIRS) to non-invasively quantify regional cerebral oxygenation (rSO<sub>2</sub>) to assess the association between poor rSO<sub>2</sub> during the first 72 hours of critical illness with delirium severity, as well as long-term sensorimotor and cognitive impairment among intensive care unit (ICU) survivors. Further, the physiological determinants of rSO<sub>2</sub> will be examined.

*Methods and analysis:* This multi-centre prospective observational study will consider adult patients ( $\geq 18$  years old) eligible for enrolment if within 24 hours of ICU admission, they require mechanical ventilation, and/or vasopressor support. For 72 hours, rSO<sub>2</sub> will be continuously recorded, while vital signs (e.g., heart rate) and peripheral oxygenation saturation will be concurrently captured with data monitoring software. Arterial and central venous gases will be sampled every 12 hours for the 72h recording period and will include: pH, partial pressure of oxygen, partial pressure of carbon dioxide, and hemoglobin concentration. Participants will be screened daily for delirium with the confusion assessment method (CAM)-ICU, whereas the brief-CAM will be used on the ward. At 3- and 12-months post-ICU discharge, neurological function will be assessed with the Repeatable Battery for the Assessment of Neuropsychological Status and KINARM sensorimotor and cognitive robot-based behavioral tasks.

*Ethics and Dissemination:* The study protocol has been approved in Ontario by a central research ethics board (Clinical Trials Ontario); non-Ontario sites will obtain local ethics approval. The study will be conducted under the guidance of the Canadian Critical Care Trials Group (CCCTG) and the results of this study will be presented at national meetings of the CCCTG for internal



1  
2  
3 72 peer review. Results will also be presented at national/international scientific conferences. Upon  
4  
5 73 completion, the study findings will be submitted for publication in peer-reviewed journals.  
6  
7

8 74 *Trial Registration:* This trial is registered on [clinicaltrials.gov](http://clinicaltrials.gov) (Identifier: [NCT03141619](https://clinicaltrials.gov/ct2/show/study/NCT03141619)),  
9  
10 75 registered May 5, 2017.  
11  
12

13 76 *Key Words:* Near-infrared spectroscopy; Cerebral oximetry; Cerebral autoregulation; KINARM,  
14  
15 77 Delirium; CAM-ICU; Post-intensive care syndrome; RBANS  
16  
17  
18

19 78  
20  
21

22 79  
23  
24

25 80  
26  
27  
28  
29  
30  
31  
32  
33  
34  
35  
36  
37  
38  
39  
40  
41  
42  
43  
44  
45  
46  
47  
48  
49  
50  
51  
52  
53  
54  
55  
56  
57  
58  
59  
60

1  
2  
3 81 **Strengths and Limitations of this study:**  
4  
5

- 6 82 • Potential to replicate our previous work in a representative cohort and further assess the  
7  
8 83 association between poor regional cerebral oxygenation (rSO<sub>2</sub>) and ICU associated.  
9  
10  
11 84 • Further assessment of dysfunctional cerebral autoregulation as a potential underlying  
12  
13 85 mechanism associated with the development of delirium and post-intensive care unit  
14  
15 86 (ICU) impairment.  
16  
17  
18 87 • Using multiple regression to further characterize the physiological determinants of the  
19  
20 88 near-infrared spectroscopy (NIRS) derived signal has the potential to lead to the  
21  
22 89 development of a novel resuscitation target during critical care.  
23  
24  
25 90 • Although this study is observational in nature, which limits causal inferences, correlating  
26  
27 91 neurophysiological and cognitive performance metrics may identify modifiable risk  
28  
29 92 factors (e.g., disturbed autoregulation duration) during critical care.  
30  
31  
32 93 • Understanding the determinants of the NIRS signal may revolutionize critical care by  
33  
34 94 providing clinicians with the ability to implement precision-based medicine, and optimize  
35  
36 95 cerebral oxygenation to preserve neurological function.  
37  
38  
39 96

1  
2  
3 **98 Introduction:**  
4  
5

6 **99** Medical advancements in the intensive care unit (ICU) has led to a substantial reduction in  
7  
8 **100** mortality rates.<sup>1,2</sup> However, survivors frequently experience post-intensive care syndrome  
9  
10 **101** (PICS), which is characterized by cognitive, psychiatric, and physical impairments.<sup>3</sup> These  
11  
12 **102** complications have profound effects, including long-term cognitive impairments affecting  
13  
14 **103** between 25-75% of survivors,<sup>3</sup> and an approximately 50% decrease in full-time employment.<sup>4</sup>  
15  
16 **104** Therefore, modern critical care research should improve our understanding of, and the  
17  
18 **105** prevention of, long-term impairments in the growing number of ICU survivors.  
19  
20  
21  
22

23 **106** A recent systematic review identified prolonged delirium as the most consistent and potentially  
24  
25 **107** modifiable risk factor for long-term cognitive impairment.<sup>5</sup> Patients with delirium experience  
26  
27 **108** persistent deficits in various domains, including: memory, executive function, verbal fluency,  
28  
29 **109** and attention.<sup>6-8</sup> Furthermore, robotic technology known as the KINARM, which uses the  
30  
31 **110** participant's upper limbs to assess sensorimotor and cognitive function, has indicated that ICU  
32  
33 **111** survivors also develop visuospatial and motor deficits.<sup>9</sup> Importantly, when assessed using the  
34  
35 **112** Repeatable Battery for Neuropsychological Status (RBANS), many critical illness survivors had  
36  
37 **113** performance scores similar to patients with moderate traumatic brain injury or mild Alzheimer's  
38  
39 **114** disease, with a duration-dependent effect of delirium on impairments in global cognition and  
40  
41 **115** executive function.<sup>6</sup>  
42  
43  
44  
45

46 **116** Delirium is characterized by reduced awareness, emotional disturbances, restlessness, and  
47  
48 **117** incoherence with a 60-87% ICU incidence rate.<sup>10</sup> While risk factors associated with delirium  
49  
50 **118** include mechanical ventilation, age, and frailty,<sup>10</sup> the underlying etiology of delirium is poorly  
51  
52 **119** understood. Cerebral ischemia is thought to play a central role in delirium development;  
53  
54  
55  
56  
57  
58  
59  
60

1  
2  
3 120 however, understanding this relationship presents several challenges due to the difficulty of  
4  
5 121 continuously measuring cerebral perfusion in the ICU.  
6  
7

8 122 This issue has resulted in a limited number of studies investigating the influence of cerebral  
9  
10 123 perfusion on delirium in critically ill patients (Reviewed in<sup>11</sup>). Near-infrared spectroscopy  
11  
12 124 (NIRS) is a non-invasive technology that measures regional cerebral oxygenation (rSO<sub>2</sub>) as a  
13  
14 125 surrogate marker of cerebral perfusion,<sup>12,13</sup> as rSO<sub>2</sub> values correlate with other markers of  
15  
16 126 cerebral perfusion, including CT perfusion, jugular venous bulb oxygen saturation, and brain  
17  
18 127 tissue oxygen tension.<sup>12-14</sup> Therefore, NIRS is an ideal candidate for both ICU research and  
19  
20 128 clinical practice.  
21  
22  
23  
24

25 129 Feasibility and single-center prospective ICU studies have been performed with NIRS,  
26  
27 130 discovering that low rSO<sub>2</sub> is an independent risk factor for the development of delirium.<sup>15,16</sup> A  
28  
29 131 nested cohort in this study demonstrated that impaired cerebral auto-regulation (i.e., the ability to  
30  
31 132 maintain stabilized and adequate cerebral perfusion) is also associated with the development and  
32  
33 133 duration of delirium.<sup>17,18</sup> While these findings were statistically significant, a multi-centre  
34  
35 134 observational study is necessary for external validation and the study of long-term outcomes.  
36  
37  
38  
39 135 Our overarching hypothesis is that decreased rSO<sub>2</sub> in the early stages of critical illness leads to  
40  
41 136 the development of delirium, as well as long-term cognitive impairment among survivors. The  
42  
43 137 primary objective is to further establish an association between poor cerebral perfusion and  
44  
45 138 delirium severity. Secondary objectives include assessing the hemodynamic and physiological  
46  
47 139 determinants of rSO<sub>2</sub>, as well as to identify potential risk factors (e.g., poor rSO<sub>2</sub>) associated with  
48  
49 140 delirium and long-term cognitive deficits. Overall, elucidating the mechanisms of acute and  
50  
51 141 chronic neurological impairment will allow for the development of preventative treatments to  
52  
53 142 improve outcomes among ICU survivors.  
54  
55  
56  
57  
58  
59  
60

1  
2  
3 **143 Methods and Analysis:**  
4  
5

6 *144 Patient and Public Involvement:* At Kingston Health Sciences Centre (KHSC), our staff includes  
7  
8 *145* a patient experience advisor who is a critical care nurse that has been previously admitted with  
9  
10 *146* respiratory failure and shock. This experience as a front-line health care professional, as well as  
11  
12  
13 *147* an ICU patient, will be invaluable to both patient and public involvement. In addition to the  
14  
15 *148* scientific community, patients and their families will also be central to the dissemination of our  
16  
17 *149* findings. Participants that selected to be informed of the results will be mailed/e-mailed the  
18  
19  
20 *150* published findings upon study completion.  
21  
22

23 *151 Study locations and participants:* An overall visual schematic of the study design is shown in  
24  
25 *152* Figure 1. This prospective observational study will take place at 7 sites within Canada. KHSC  
26  
27 *153* will serve as the coordinating centre, as the ICU has a history of coordinating academic and  
28  
29 *154* industry funded studies and the staff are familiar with the CONFOCAL protocol, as the pilot  
30  
31 *155* study<sup>16</sup> was conducted at this site. Patients are considered eligible if they are  $\geq 18$  years old, have  
32  
33 *156* been admitted to the ICU  $> 24$  hours and have respiratory failure requiring invasive mechanical  
34  
35 *157* ventilation with an expected duration  $> 24$  hours, and/or have shock of any etiology. Shock will  
36  
37 *158* be defined by the need for one of the following vasopressors/inotropes: Dopamine  $\geq 7.5$   
38  
39 *159* mcg/kg/min, Dobutamine  $\geq 5$  mcg/kg/min, Norepinephrine  $\geq 5$  mcg/min, Phenylephrine  $\geq 75$   
40  
41 *160* mcg/min, Epinephrine at any dose, Milrinone at any dose (if used in conjunction with another  
42  
43 *161* agent), Vasopressin  $\geq 0.03$  u/min (if used in conjunction with another agent), which is adapted  
44  
45 *162* from the BRAIN-ICU inclusion criteria.<sup>6</sup> The exclusion criteria are admission to the ICU  $> 24$   
46  
47 *163* hours, a life expectancy  $< 24$  hours, a primary central nervous system admitting diagnosis (e.g.,  
48  
49 *164* traumatic brain injury, stroke, subarachnoid haemorrhage), and/or any reason that the subject  
50  
51 *165* may not be able to participate in the follow up assessments (e.g., limb amputation, paresis,  
52  
53  
54  
55  
56  
57  
58  
59  
60

1  
2  
3 166 neuromuscular disorders). Post-cardiac arrest patients are also excluded from this study.  
4

5 167 Additional study sites will include the following: Toronto Western Hospital (Site PI Dr. Victoria  
6  
7 168 McCredie), Université de Montreal (Montreal, QC; Site PI Dr. Michael Chasse), London Health  
9  
10 169 Sciences Centre-Victoria Hospital (London, ON; Site PI Dr. Ian Ball, with co-PIs Dr. Marat  
11  
12 170 Slesserev and Dr. Niamh O'Reagan), Ottawa General Hospital (Site PI Dr. Shane English),  
13  
14 171 Ottawa Civic Hospital (Site PI Dr. Shane English), and Vancouver General Hospital (Site PI Dr.  
15  
16 172 Donald Griesdale). KHSC is responsible for developing and maintaining the electronic case  
17  
18 173 report forms (eCRF), data management, and analysis.  
19  
20  
21  
22 174

23  
24 175 *Recruitment and consent:* The Queen's University and Affiliated Hospitals Health Sciences  
25  
26 176 Research Ethics Board will serve as the board of record for the streamlined research ethics  
27  
28 177 review system (Clinical Trials Ontario) and all Ontario sites have gained approval; Non-Ontario  
29  
30 178 sites will need to obtain local ethics approval at their earliest convenience. All patients admitted  
31  
32 179 to the ICU will be screened daily for eligibility. The participant will be approached by a member  
33  
34 180 of the research staff. If the participant is unable to provide consent, the research staff will  
35  
36 181 approach the Substitute Decision Maker (SDM). The research coordinator or trained study staff  
37  
38 182 will obtain informed consent and documentation of the consent process will be noted in the  
39  
40 183 patient's medical chart. As patients meeting eligibility criteria are unlikely to be able to give  
41  
42 184 informed consent at the time of enrolment due to their critical condition, we will employ a  
43  
44 185 deferred consent model when appropriate (e.g., SDMs are frequently in an emotional state and  
45  
46 186 may not be available to be contacted), which has already been granted local research ethics board  
47  
48 187 approval. When an SDM is not available to approach, we will enrol the patient and begin trial  
49  
50  
51  
52 188 procedures until the SDM is available for a consent encounter, targeted to be within 72 hours of  
53  
54  
55  
56  
57  
58  
59  
60

1  
2  
3 189 enrolment. However, we will encourage an *a priori* informed consent whenever possible. The  
4  
5 190 SDM response will be used to continue all trial procedures or any further data collection. If the  
6  
7  
8 191 patient or substitute decision maker declines enrolment, then the patient will be excluded, and all  
9  
10 192 data obtained using deferred consent will be confidentially destroyed. In addition, once the  
11  
12 193 patient has regained capacity according to the medical team, the patient will be approached to  
13  
14 194 affirm or withdraw consent. Each site will be provided with patient identification numbers,  
15  
16 195 which will be assigned sequentially when a patient is enrolled and will be used in all study  
17  
18 196 documentation to ensure patient confidentiality and anonymity. All eligible patients will be  
19  
20 197 recorded on a screening log, which will include their study ID, date of consent, or reason the  
21  
22 198 patient could not be enrolled. The de-identified screening log will be forwarded to the lead  
23  
24 199 project coordinator on a monthly basis. The individual site research coordinators and  
25  
26 200 investigators will be responsible for ensuring the ethical conduct of this trial, screening patients,  
27  
28 201 obtaining consent, and training of staff as needed. The principal investigators and co-  
29  
30 202 investigators will review monthly compliance with the study protocol and recruitment rates.  
31  
32  
33

34  
35  
36 203 *Confidentiality:* To ensure patient confidentiality, identifying information will not be collected  
37  
38 204 on the Case Report Form. Patients will be identified to the coordinating centre only by their  
39  
40 205 unique study identification number. The site study coordinator will maintain a participant master  
41  
42 206 list including the participant name and linked study ID. At the end of the study, this master list  
43  
44 207 will be destroyed. In accordance with current requirements, we will store the de-identified data  
45  
46 208 for a minimum of 10 years.  
47  
48  
49

50  
51 **Data Collection:**  
52

53 210 *rSO<sub>2</sub>, hemodynamics, medications, and clinical characteristics:* Patients will be enrolled within  
54  
55 211 the first 24 hours of their ICU admission. Immediately following enrolment, the patient will  
56  
57  
58  
59  
60

1  
2  
3 212 undergo rSO<sub>2</sub> monitoring. A sensor will be placed in the centre of the patient's forehead, which  
4  
5 213 is attached to the FORESIGHT ELITE oximeter (CASMED, Caster Medical, Canada). This  
6  
7  
8 214 device will provide continuous quantification of rSO<sub>2</sub>, every 2 seconds, for 72 hours. To assess  
9  
10 215 the association between hemodynamics and rSO<sub>2</sub> recordings, we will use a commercially  
11  
12 216 available system (Bedmaster, Excel Medical Electronics, FL, USA; or site equivalent) to capture  
13  
14  
15 217 the following vital signs from enrolled patients: heart rate (HR), systolic blood pressure (SBP),  
16  
17 218 diastolic blood pressure (DBP), mean arterial pressure (MAP), and peripheral oxygen saturation  
18  
19 219 (SpO<sub>2</sub>). These data are captured locally and uploaded to the eCRF (REDCap). Throughout this  
20  
21 220 72-hour period of recording, we will document administered continuous infusion and intermittent  
22  
23 221 bolus doses of vasoactive and sedative/analgesic medications, which will be converted to either  
24  
25 222 "fentanyl equivalents" for narcotics, or "midazolam equivalents" for benzodiazepine  
26  
27  
28 223 medications. These conversion formulas have been previously described.<sup>19</sup> Severity of illness  
29  
30 224 will be measured during the first 24 hours of ICU admission using the Acute Physiology and  
31  
32 225 Chronic Health Evaluation II score (APACHE II). Trained research staff will approach  
33  
34 226 whomever provided informed consent (i.e., either the patient or the SDM) to ascertain the  
35  
36  
37 227 enrolled patient's pre-existing frailty (i.e., prior to ICU admission) using the clinical frailty  
38  
39 228 scale,<sup>20</sup> which is 9-point scale (e.g., 1 = very fit to 9 = terminally ill). All clinical data will be  
40  
41  
42 229 captured on the eCRF.

43  
44  
45 230 *Central venous and arterial blood collection:* Both arterial and central venous gases will be  
46  
47 231 sampled every 12 hours during the 72h period of rSO<sub>2</sub> recording and will include: pH, partial  
48  
49 232 pressure of oxygen (pO<sub>2</sub>), partial pressure of carbon dioxide (pCO<sub>2</sub>), and hemoglobin  
50  
51 233 concentration (Hb). These blood samples will be collected only if a central line (PICC, internal  
52  
53 234 jugular, subclavian) and arterial line are *already* in place.



1  
2  
3 235 *Delirium screening:* Patients will be assessed once daily for delirium throughout their entire  
4  
5 236 hospital stay (ICU and ward; up to day 30) using validated screening tools; the Confusion  
6  
7 237 Assessment Method (CAM)-ICU<sup>21</sup>, as well as the brief Confusion Assessment Method  
8  
9 238 (bCAM)<sup>22</sup> which will be administered on the ward. Both delirium screening tools will be  
10  
11 239 administered by trained research staff at a time that is convenient for the patient, their family,  
12  
13 240 and the medical team directing their care.  
14  
15

16  
17 241 From the CAM-ICU, the CAM-ICU 7 (i.e., 7-point delirium severity scale) will also be  
18  
19 242 documented (i.e., 0-2: no delirium, 3-5: mild to moderate delirium, and 6-7: severe delirium).<sup>23</sup>  
20  
21 243 The ICU discharge day will be considered to be the day that the attending writes orders to  
22  
23 244 discharge, in order to avoid the influence of delayed discharge.  
24  
25

26  
27 245 *Determination of pre-existing cognitive impairment:* Our pilot study<sup>16</sup> excluded 10% of patients  
28  
29 246 with a documented history of cognitive impairment in their medical chart, which may limit  
30  
31 247 external validity. Importantly, individuals may have substantial cognitive impairment prior to  
32  
33 248 enrolment but did not receive any formal diagnosis. To address this potential confound, all  
34  
35 249 patients will be assessed, upon enrolment, using the clinical dementia rating (CDR) scale.<sup>24</sup> The  
36  
37 250 CDR is a scale from 0 (Normal) to 3 (severe dementia) that is calculated from a standardized  
38  
39 251 scoring sheet completed by interviewing a patient or their caregiver. All staff completing the  
40  
41 252 interview and scoring sheet will undergo rigorous online training and pass a certification exam.  
42  
43 253 A diagnosis of pre-existing cognitive impairment will be defined as a CDR >1.  
44  
45  
46  
47  
48

49 254

50  
51  
52 **3- and 12-Month Follow Up:**  
53  
54  
55  
56  
57  
58  
59  
60

1  
2  
3 256 *Neuropsychological assessment: Repeatable Battery for the Assessment of Neuropsychological*  
4  
5 257 *Status (RBANS):* Participants will complete a 3- and 12-month follow up assessment in which  
6  
7 258 the RBANS will be administered by a trained researcher. The RBANS assesses global cognition,  
8  
9 259 as well as several subdomains (i.e., immediate and delayed memory, visuospatial/constructional,  
10  
11 260 language, and attention). These indices have been described previously,<sup>25</sup> and survivors will be  
12  
13 261 compared to age-matched controls. To improve follow up rates, in home/hospital testing will be  
14  
15 262 performed for individuals not able to return for laboratory assessment. Participant scores are  
16  
17 263 converted to standardized values in which the normative range will be considered a mean of  
18  
19 264 100+/-24.75 (1.65 SD). Participants that score >75 will not be considered impaired, as these  
20  
21 265 subjects are performing within or above the normative range. The RBANS assessment requires  
22  
23 266 ~20-30 minutes to complete.

24  
25  
26  
27  
28  
29 267 *KINARM Assessment:* Participants (from the Kingston region only) will complete a 3- and 12-  
30  
31 268 month follow up assessment using the End-Point bimanual KINARM robot (BKIN  
32  
33 269 Technologies, Kingston). With each hand, the seated subject grasps a handle attached to a planar  
34  
35 270 robotic device that permits movements in the horizontal plane with an integrated virtual reality  
36  
37 271 system that presents objects in the horizontal plane (Figure 2). Subjects will perform a  
38  
39 272 behavioural battery to quantify a broad range of sensorimotor, and cognitive function using their  
40  
41 273 upper limbs. A trained operator selects a task from the software menu, reads the standardized  
42  
43 274 instructions, and then monitors performance in real-time. We will administer 8 tasks from the  
44  
45 275 KINARM Standard Tests™ including: Object Hit (OH),<sup>26</sup> Object Hit and Avoid (OHA),<sup>27</sup> Ball  
46  
47 276 on Bar (BonB),<sup>28</sup> Visually Guided Reaching (VGR),<sup>29</sup> Reverse Visually Guided Reaching  
48  
49 277 (RVGR),<sup>30</sup> Spatial Span (SS), Trail Making A and B, and Arm Position Matching (APM),<sup>31</sup>.  
50  
51 278 Each task has been previously described,<sup>32</sup> and quantifies subject performance using

1  
2  
3 279 approximately 6 to 12 metrics per task. Each metric is converted into normalized units based on  
4  
5 280 healthy subject performance, considering the influence of sex, age, and handedness (0 is mean  
6  
7 281 performance and  $\pm 1$  is a standard deviation from the mean). For each task, a task score will also  
8  
9 282 be generated to provide a global performance measure with values that are equivalent to standard  
10  
11 283 deviation units with zero specifying best possible performance, and higher values indicating  
12  
13 284 worse performance. Therefore, performance will be considered abnormal if the task score is  
14  
15 285 outside the  $+1.96$  range (i.e., 5th percentile). The task score has been previously described.<sup>33</sup> The  
16  
17 286 KINARM assessment takes ~45 minutes to complete.  
18  
19  
20  
21  
22  
23  
24

#### 25 288 **Statistical Plan:**

26  
27  
28 289 *Quantification of disturbed cerebral autoregulation:* Cerebral autoregulation will be evaluated  
29  
30 290 by computing customized algorithms (MATLAB, MathWorks, MA, USA) of the time-varying  
31  
32 291 Spearman correlation coefficients between  $rSO_2$  and MAP (i.e., cerebral autoregulation index,  
33  
34 292 COx) with a moving time window advanced in 1 min steps over the 72-hour period of recording.  
35  
36 293 This cerebral autoregulation assessment has been previously described<sup>18</sup> and a visual  
37  
38 294 representation can be observed in Figure 3. In addition, we will perform the COx across varying  
39  
40 295 window lengths to further assess the optimal window length of recording (e.g., 5, 10, 30, 60, 120,  
41  
42 296 240, 300-minute windows). Positive COx values (i.e., MAP and  $rSO_2$  move in the same  
43  
44 297 direction) reflect dysfunctional cerebral autoregulation, whereas negative (i.e., MAP and  $rSO_2$   
45  
46 298 move in the opposite direction) and near zero ( $< 0.3$ ) indicate intact cerebral autoregulation.  
47  
48 299 However, we will define cerebral autoregulation dysfunction by using a statistical significance  
49  
50 300 threshold for positive COx correlation values ( $p < 0.0001$ ). Cumulative duration of disturbed  
51  
52 301 autoregulation will be given by the duration of time spent with a significant positive correlation  
53  
54  
55  
56  
57  
58  
59  
60

1  
2  
3 302 throughout the period of neuromonitoring. Computer algorithms for COx will be developed and  
4  
5 303 implemented blind to the neurological status of enrolled patients.  
6  
7

8 304 *Estimating optimal MAP:* To calculate the individualized optimal MAP ( $MAP_{OPT}$ ), the computed  
9  
10 305 COx values will be binned by the average MAP value in their respective moving windows in 5  
11  
12 306 mmHg bins.<sup>34</sup> An alternative strategy will also be implemented. We will invert the  $MAP_{OPT}$   
13  
14 307 binning procedure by binning MAP values by their corresponding COx values in sequential 0.05  
15  
16 308 bins of Spearman correlation coefficients ranging from -1 to +1. This procedure has been  
17  
18 309 previously described.<sup>18</sup>  
19  
20  
21  
22

23 310 *Assessment of primary outcome:* Multivariate linear regression will be used to characterize the  
24  
25 311 association between adequate cerebral perfusion (as measured using duration of time (minutes)  
26  
27 312 outside of  $MAP_{OPT}$ , mean  $rSO_2$ , and duration of disturbed cerebral autoregulation) and delirium  
28  
29 313 severity throughout a patient's ICU stay to determine if poor cerebral oxygenation is an  
30  
31 314 independent predictor of delirium. We will estimate the unadjusted effect of each individual  
32  
33 315 predictor on delirium severity (i.e., cumulative CAM-7 scores per patient). The simultaneous  
34  
35 316 multivariate regression model will adjust for the following covariates due to their potential  
36  
37 317 associations with delirium: a history of hypertension, a history of alcohol abuse, total sedative  
38  
39 318 dose (in midazolam equivalents), total narcotic dose (in fentanyl equivalents), severity of illness  
40  
41 319 (APACHE II scores), pre-existing cognitive impairment (CDR score), length of ICU stay, frailty,  
42  
43 320 (clinical frailty scale) and blood urea nitrogen. The multivariable model will provide the adjusted  
44  
45 321 regression coefficients after controlling for all predictors included in the model. All covariates  
46  
47 322 included in regression modeling have been chosen *a priori* based on clinical judgment and  
48  
49 323 previous research.<sup>16,35</sup> Model diagnostics will be conducted to assess the underlying assumptions  
50  
51 324 of linear regression (i.e., linearity, normally distributed residuals, equal variances, and lack of  
52  
53  
54  
55  
56  
57  
58  
59

1  
2  
3 325 multicollinearity) for all models. Multiple imputation strategies will be applied at the time of the  
4  
5 326 regression modeling to account for any missing data and reduce bias associated with excluding  
6  
7  
8 327 patients due to partially collected data.  
9

10  
11 328 *Secondary outcomes:*

12  
13  
14 329 *Determinants of rSO<sub>2</sub>:* To assess the hemodynamic and physiological determinants of rSO<sub>2</sub> at the  
15  
16 330 patient level, multiple linear regression will be performed using the patient average of each  
17  
18 331 variable over the 72-hour data collection period. The following predictors will be included in the  
19  
20 332 regression model: HR, SpO<sub>2</sub>, MAP, arterial, and venous blood gas data (i.e., pH, pO<sub>2</sub>, and  
21  
22 333 pCO<sub>2</sub>), central venous oxygen saturation, and Hb concentration. In addition, the multivariate  
23  
24 334 model will control for the following covariates associated with cerebral perfusion: age,<sup>36</sup> as well  
25  
26 335 as total sedative, narcotic, and vasopressor dosing. Simultaneous multiple linear regression with  
27  
28 336 adjustment for all aforementioned covariates will be implemented. As stated for the primary  
29  
30 337 outcome regression analysis, model diagnostics will be performed. Furthermore, the relationship  
31  
32 338 between the determinants of the NIRS-derived rSO<sub>2</sub> signal may vary over time (see Figure 4 and  
33  
34 339 Supplemental Movie 1). Therefore, a repeated measures analysis will also be performed by using  
35  
36 340 multilevel modeling with 6 observations reflecting each 12-hour period during the 72-hour data  
37  
38 341 collection period (with time coded as 0 – 5, so the intercept equals baseline/time of enrolment)  
39  
40 342 nested within each subject. The predictors will be the same as the regression model but allowed  
41  
42 343 to be time varying across the 6 observation points. This analysis will assess if within patient  
43  
44 344 changes in the predictors correlate with changes in rSO<sub>2</sub>, and if these associations are modified  
45  
46 345 by fixed patient characteristics, such as age.  
47  
48  
49  
50  
51  
52

53 346 *Assessing if poor cerebral perfusion during critical illness is a significant predictor of long-term*  
54  
55 347 *neurological dysfunction among ICU survivors:* Multiple linear regression analysis will be used  
56  
57  
58  
59  
60

1  
2  
3 348 to assess if impaired cerebral perfusion (i.e., time below  $MAP_{OPT}$ , mean  $rSO_2$ , and duration of  
4  
5 349 disturbed cerebral autoregulation) is associated with RBANS global cognition scores at 3- and  
6  
7  
8 350 12-months post-ICU discharge. We will use the following clinical covariates collected on  
9  
10 351 admission (i.e., pre-existing cognitive impairment, age, severity of illness, frailty) and data  
11  
12 352 collected within the first 72 hours of the patients' ICU stay (i.e., narcotic dosing and  
13  
14 353 benzodiazepine dosing). All covariates will be adjusted for in separate regression models for the  
15  
16 354 cognitive outcomes at 3- and 12-months post-ICU discharge. If global cognition is significantly  
17  
18 355 predicted by the time below  $MAP_{OPT}$ , we will conduct an exploratory analysis of the RBANS  
19  
20 356 subdomains of cognition (i.e., delay and immediate memory, language, attention,  
21  
22 357 visuospatial/constructional) adjusting for the aforementioned covariates to further explore  
23  
24 358 specific areas of impairment observed among survivors of critical illness. Due to the limited  
25  
26 359 availability of the KINARM robot across sites, only patients assessed at KHSC will undergo  
27  
28 360 KINARM testing. This data will be assessed with descriptive statistics only to avoid any potential  
29  
30 361 bias introduced by this design.

### 362 **Sample Size Calculation:**

363 *Primary Outcome:* Our overall hypothesis is that poor cerebral perfusion contributes to delirium  
364 and long-term cognitive impairment. For study purposes, we define poor cerebral perfusion as  
365 the composite of 1) low mean  $rSO_2$ , 2) duration of impaired cerebral autoregulation, and 3) time  
366 outside individualized optimal MAP ( $MAP_{OPT}$ ), which will be discussed in more detail in the  
367 statistical plan section. We acknowledge that this is an imperfect measure of cerebral perfusion.  
368 However, this is a comprehensive, continuous, and non-invasive assessment of cerebral  
369 perfusion. For our primary outcome (CAM-7 delirium severity score), we will enrol a total of  
370 500 patients, as our prior work has demonstrated that ~20% of patients remain comatose (RASS

1  
2  
3 371 = -4 or -5) during their entire ICU stay<sup>16</sup>, and cannot be assessed for delirium. Therefore, using  
4  
5 372 our pilot data, we estimate that ~100 patients will be remain comatose resulting in approximately  
6  
7 373 400 patients to assess our primary outcome, which will allow for 10 degrees of freedom for our 3  
8  
9 374 measures of perfusion (i.e., mean rSO<sub>2</sub>, duration of disturbed cerebral autoregulation, duration  
10  
11 375 outside MAP<sub>OPT</sub>) and controlling for the 9 covariates (see below). The 10 degrees of freedom  
12  
13 376 will allow us to model non-linear relationships between the 3 measures of cerebral perfusion and  
14  
15 377 delirium severity. This sample size achieves 90% power to detect an R<sup>2</sup> of 0.050 collectively  
16  
17 378 among these measures of cerebral perfusion and using an F-test with a significance level (alpha)  
18  
19 379 of 0.050 (see Figure 5).  
20  
21  
22  
23

#### 24 380 *Secondary Outcomes-Physiological determinants of rSO<sub>2</sub> and neurological outcomes*

25  
26  
27 381 For evaluating the determinants of the rSO<sub>2</sub> signal during critical illness, we will assess the  
28  
29 382 association between each of the 9 pre-specified candidate predictors of rSO<sub>2</sub> after controlling for  
30  
31 383 the 4 co-variates (see below for co-variates). We will use a Bonferroni correction  
32  
33 384 (0.05/9=0.0056) to control for multiple testing. With the total 500 patients recruited, and a  
34  
35 385 multivariate regression model that includes 13 independent variables, this testing strategy will  
36  
37 386 provide 90% power to identify any predictor that explains an additional 3.2% of the variance of  
38  
39 387 rSO<sub>2</sub> after controlling for the other variables in the model. This sample size is sufficient to  
40  
41 388 identify independent significant predictors that account for a small-moderate degree of variance  
42  
43 389 in the overall rSO<sub>2</sub> signal. However, our pilot data indicated a 30% mortality rate. Given our  
44  
45 390 overall sample size of 500 patients recruited, we are anticipating ~350 ICU survivors (i.e., 500-  
46  
47 391 150) to return for follow up assessment. This cohort will provide sufficient power to detect  
48  
49 392 important predictors of long-term neurological outcomes. However, these predictors have been  
50  
51  
52  
53  
54  
55  
56  
57  
58  
59  
60

1  
2  
3 393 intentionally not specified *a priori*, as this analysis will be dependent on our findings related to  
4  
5 394 cerebral perfusion and delirium.  
6  
7

8 395 All sample size calculations were conducted using Power Analysis and Sample Size Software  
9  
10 396 (Version 15).<sup>37</sup>  
11  
12

13  
14 397  
15

16 398 The actual start date at KHSC began on January 26, 2018 and our estimated primary completion  
17  
18 399 data is June 2022. Due to our 12 month follow up, we expect the study to be completed June  
19  
20 400 2023.  
21  
22

23  
24 401  
25  
26  
27  
28  
29  
30  
31  
32  
33  
34  
35  
36  
37  
38  
39  
40  
41  
42  
43  
44  
45  
46  
47  
48  
49  
50  
51  
52  
53  
54  
55  
56  
57  
58  
59  
60



1  
2  
3 402 **DISCUSSION**  
4  
5

6 403 This multicentre observational study will extend our preliminary findings of reduced rSO<sub>2</sub> as an  
7  
8 404 independent risk factor for the development of delirium during critical illness. With the proposed  
9  
10 405 larger sample size, we will not only be able to replicate and validate this completely novel  
11  
12 406 finding, but we will also be able to further characterize the physiological determinants of rSO<sub>2</sub> in  
13  
14 407 a representative cohort. Furthermore, this study will have the potential to identify novel  
15  
16 408 pathophysiological mechanism associated with the development of delirium and long-term  
17  
18 409 neurological dysfunction among ICU survivors. These findings will inform the next phase of this  
19  
20 410 research program: a proof-of-principal study, aimed at devising strategies to optimize rSO<sub>2</sub>. It  
21  
22 411 will lay the foundation for a larger interventional study designed to assess whether optimization  
23  
24 412 of rSO<sub>2</sub> can reduce delirium and improve long-term neurological outcomes for patients.  
25  
26  
27  
28  
29

30 413  
31  
32

33 414  
34  
35  
36  
37  
38  
39  
40  
41  
42  
43  
44  
45  
46  
47  
48  
49  
50  
51  
52  
53  
54  
55  
56  
57  
58  
59  
60

1  
2  
3 415 **Ethics and Dissemination:**  
4  
5

6 416 *Risks/Ethical Considerations:* Ethics approval will be obtained prior to the commencement of  
7  
8 417 screening and enrolment at each site. There are no assumed risks associated with the proposed  
9  
10 418 assessment procedures, as this study only involves a small amount of bloodwork, which will only  
11  
12 419 be collected if a central line and arterial line are *already* in place. Furthermore, results from our  
13  
14 420 pilot study demonstrated that non-invasive monitoring of cerebral oxygenation, while using a  
15  
16 421 deferred consent model, does not interfere with patient care or management.<sup>15</sup> Research  
17  
18 422 participants and their SDMs will be informed that enrolment in this study will not affect their  
19  
20 423 care in any way, and that they have the right to refuse participation or withdraw at any time.  
21  
22  
23  
24

25 424 *Dissemination of results:* The results of this study will be presented at national meetings of the  
26  
27 425 Canadian Critical Care Trials Group. Prior to submitting any manuscript for publication, it will  
28  
29 426 undergo rigorous internal peer review by this group of critical care experts. Our study group has  
30  
31 427 a long track record of presenting our data at national and international critical care conferences.  
32  
33 428 We anticipate the preliminary results of this research program will also be presented at these  
34  
35 429 conferences (e.g., American Delirium Society). The final study results will be submitted for  
36  
37 430 publication to high impact journals.  
38  
39  
40  
41

42 431

43  
44 432

45  
46 433  
47  
48  
49  
50  
51  
52  
53  
54  
55  
56  
57  
58  
59  
60

434 **References:**

- 435 1. Hutchings, A. *et al.* Evaluation of modernisation of adult critical care services in England:  
436 time series and cost effectiveness analysis. *BMJ* **339**, b4353–b4353 (2009).
- 437 2. Zimmerman, J. E., Kramer, A. A. & Knaus, W. A. Changes in hospital mortality for  
438 United States intensive care unit admissions from 1988 to 2012. *Crit. Care* **17**, R81  
439 (2013).
- 440 3. Rawal, G., Yadav, S. & Kumar, R. Post-intensive care syndrome: An overview. *J. Transl.*  
441 *Intern. Med.* **5**, 90–92 (2017).
- 442 4. Norman, B. C. *et al.* Employment Outcomes After Critical Illness. *Crit. Care Med.*  
443 (2016). doi:10.1097/CCM.0000000000001849
- 444 5. Sakusic, A. *et al.* Potentially Modifiable Risk Factors for Long-Term Cognitive  
445 Impairment After Critical Illness: A Systematic Review. *Mayo Clin. Proc.* **93**, 68–82  
446 (2018).
- 447 6. Pandharipande, P. P. *et al.* Long-Term Cognitive Impairment after Critical Illness. *N.*  
448 *Engl. J. Med.* **369**, 1306–1316 (2013).
- 449 7. Suchyta, M. R., Jephson, A. & Hopkins, R. O. Neurologic Changes during Critical Illness:  
450 Brain Imaging Findings and Neurobehavioral Outcomes. *Brain Imaging Behav.* **4**, 22–34  
451 (2010).
- 452 8. Wolters, A. E., Slooter, A. J. C., van der Kooi, A. W. & Van Dijk, D. Cognitive  
453 impairment after intensive care unit admission: a systematic review. *Intensive Care Med.*  
454 **39**, 376–386 (2013).
- 455 9. Wood, M. D., Maslove, D. M., Muscedere, J., Scott, S. H. & Boyd, J. G. Robotic  
456 technology provides objective and quantifiable metrics of neurocognitive functioning in  
457 survivors of critical illness: A feasibility study. *J. Crit. Care* **48**, 228–236 (2018).
- 458 10. Maldonado, J. R. Acute Brain Failure: Pathophysiology, Diagnosis, Management, and  
459 Sequelae of Delirium. *Crit. Care Clin.* **33**, 461–519 (2017).
- 460 11. Bendahan, N., Neal, O., Ross-White, A., Muscedere, J. & Boyd, J. G. Relationship  
461 Between Near-Infrared Spectroscopy-Derived Cerebral Oxygenation and Delirium in  
462 Critically Ill Patients: A Systematic Review. *J. Intensive Care Med.* 885066618807399  
463 (2018). doi:10.1177/0885066618807399
- 464 12. McLeod, A. D., Igielman, F., Elwell, C., Cope, M. & Smith, M. Measuring cerebral  
465 oxygenation during normobaric hyperoxia: a comparison of tissue microprobes, near-  
466 infrared spectroscopy, and jugular venous oximetry in head injury. *Anesth. Analg.* **97**,  
467 851–6 (2003).
- 468 13. Taussky, P. *et al.* Validation of frontal near-infrared spectroscopy as noninvasive bedside  
469 monitoring for regional cerebral blood flow in brain-injured patients. *Neurosurg. Focus*  
470 **32**, E2 (2012).
- 471 14. Kim, M. B. *et al.* Estimation of jugular venous O<sub>2</sub> saturation from cerebral oximetry or

- 1  
2  
3 472 arterial O<sub>2</sub>saturation during isocapnic hypoxia. *J. Clin. Monit. Comput.* (2000).  
4 473 doi:10.1023/A:1009940031063  
5  
6 474 15. Wood, M. *et al.* Brain Tissue Oxygenation in Patients with Septic Shock: a Feasibility  
7 475 Study. *Can. J. Neurol. Sci.* **43**, 65–73 (2016).  
8  
9 476 16. Wood, M. D., Maslove, D. M., Muscedere, J. G., Day, A. G. & Gordon Boyd, J. Low  
10 477 brain tissue oxygenation contributes to the development of delirium in critically ill  
11 478 patients: A prospective observational study. *J. Crit. Care* **41**, 289–295 (2017).  
12  
13 479 17. Pfister, D. *et al.* Cerebral perfusion in sepsis-associated delirium. *Crit. Care* **12**, R63  
14 480 (2008).  
15  
16 481 18. Lee, K. F., Wood, M. D., Maslove, D. M., Muscedere, J. G. & Boyd, J. G. Dysfunctional  
17 482 cerebral autoregulation is associated with delirium in critically ill adults. *J. Cereb. Blood*  
18 483 *Flow Metab.* 0271678X1880308 (2018). doi:10.1177/0271678X18803081  
19  
20 484 19. Mehta, S. *et al.* Prevalence, Risk Factors, and Outcomes of Delirium in Mechanically  
21 485 Ventilated Adults. *Crit. Care Med.* **43**, 557–66 (2014).  
22  
23 486 20. Rockwood, K. *et al.* A global clinical measure of fitness and frailty in elderly people. *Can.*  
24 487 *Med. Assoc. J.* **173**, 489–495 (2005).  
25  
26 488 21. Ely, E. W. *et al.* Evaluation of delirium in critically ill patients: validation of the  
27 489 Confusion Assessment Method for the Intensive Care Unit (CAM-ICU). *Crit. Care Med.*  
28 490 **29**, 1370–1379 (2001).  
29  
30 491 22. Han, J. H. *et al.* Diagnosing delirium in older emergency department patients: validity and  
31 492 reliability of the delirium triage screen and the brief confusion assessment method. *Ann.*  
32 493 *Emerg. Med.* **62**, 457–465 (2013).  
33  
34 494 23. Khan, B. A. *et al.* The Confusion Assessment Method for the ICU-7 Delirium Severity  
35 495 Scale: A Novel Delirium Severity Instrument for Use in the ICU. *Crit. Care Med.* **45**,  
36 496 851–857 (2017).  
37  
38 497 24. Hughes, C. P., Berg, L., Danziger, W. L., Coben, L. A. & Martin, R. L. A new clinical  
39 498 scale for the staging of dementia. *Br. J. Psychiatry* **140**, 566–72 (1982).  
40  
41 499 25. Randolph, C., Tierney, M. C., Mohr, E. & Chase, T. N. The Repeatable Battery for the  
42 500 Assessment of Neuropsychological Status (RBANS): preliminary clinical validity. *J. Clin.*  
43 501 *Exp. Neuropsychol.* **20**, 310–9 (1998).  
44  
45 502 26. Tyryshkin, K. *et al.* A robotic object hitting task to quantify sensorimotor impairments in  
46 503 participants with stroke. *J. Neuroeng. Rehabil.* **11**, 47 (2014).  
47  
48 504 27. Bourke, T. C. *et al.* A robot-based behavioural task to quantify impairments in rapid motor  
49 505 decisions and actions after stroke. *J. Neuroeng. Rehabil.* **13**, 91 (2016).  
50  
51 506 28. Lowrey, C. R., Jackson, C. PT., Bagg, S. D., Dukelow, S. P., & Scott, S. H., Lowrey, C. &  
52 507 Jackson, C. A Novel Robotic Task for Assessing Impairments in Bimanual Coordination  
53 508 Post-Stroke. *Int. J. Phys. Med. Rehabil.* **s3**, (2014).  
54  
55 509 29. Coderre, A. M. *et al.* Assessment of upper-limb sensorimotor function of subacute stroke  
56  
57  
58  
59  
60

- 1  
2  
3 510 patients using visually guided reaching. *Neurorehabil. Neural Repair* **24**, 528–541 (2010).  
4  
5 511 30. Hawkins, K. M. & Sergio, L. E. Visuomotor Impairments in Older Adults at Increased  
6 512 Alzheimer's Disease Risk. *J. Alzheimers. Dis.* **42**, 607–621 (2014).  
7  
8 513 31. Dukelow, S. P. *et al.* Quantitative assessment of limb position sense following stroke.  
9 514 *Neurorehabil. Neural Repair* **24**, 178–187 (2010).  
10  
11 515 32. Wood, M. D. *et al.* Assessing the relationship between brain tissue oxygenation and  
12 516 neurological dysfunction in critically ill patients : study protocol. *Int J Clin Trials* **3**, 98–  
13 517 105 (2016).  
14  
15 518 33. Simmatis, L., Krett, J., Scott, S. H. & Jin, A. Y. Robotic exoskeleton assessment of  
16 519 transient ischemic attack. *PLoS One* **12**, e0188786 (2017).  
17  
18 520 34. Sekhon, M. S. *et al.* Using the relationship between brain tissue regional saturation of  
19 521 oxygen and mean arterial pressure to determine the optimal mean arterial pressure in  
20 522 patients following cardiac arrest: A pilot proof-of-concept study. *Resuscitation* **106**, 120–  
21 523 125 (2016).  
22  
23 524 35. Wassenaar, A. *et al.* Multinational development and validation of an early prediction  
24 525 model for delirium in ICU patients. *Intensive Care Med.* **41**, 1048–1056 (2015).  
25  
26 526 36. Buijs, P. C. *et al.* Effect of age on cerebral blood flow: measurement with ungated two-  
27 527 dimensional phase-contrast MR angiography in 250 adults. *Radiology* **209**, 667–74  
28 528 (1998).  
29  
30 529 37. PASS 15 Power Analysis and Sample Size Software (2017). NCSS, LLC. Kaysville, Utah,  
31 530 USA, [nccs.com/software/pass](http://nccs.com/software/pass).  
32

33 531  
34  
35  
36  
37  
38  
39  
40  
41  
42  
43  
44  
45  
46  
47  
48  
49  
50  
51  
52  
53  
54  
55  
56  
57  
58  
59  
60

1  
2  
3 **532 Acknowledgments:**  
4

5 533 The authors would like to thank the study coordinators, Ms. Miranda Hunt, Ms. Ilinca  
6 534 Georgescu, and Mrs. Tracy Boyd, as well as the entire KHSC ICU staff for their continued  
7 535 support of our clinical research. This manuscript underwent an internal peer-review process with  
8 536 the Canadian Critical Care Trials Group, and we are greatly appreciative of the helpful  
9 537 contributions made by both Dr. Lisa Burry and Dr. Pierre Cardinal. We would also like to thank  
10 538 the KINARM technologists, Ms. Simone Appaqaq, Ms. Kim Moore, and Ms. Helen Bretzke.  
11  
12

13 539  
14

15 **540 List of Abbreviations**  
16

17 541 APM: Arm Position Matching  
18

19 542 BonB: Ball on Bar  
20

21 543 bCAM: Brief Confusion Assessment Method  
22

23 544 CDR: Clinical Dementia Rating Scale  
24

25 545 COx: Cerebral Oximetry Index  
26

27 546 Hb: Hemoglobin Concentration  
28

29 547 HR: Heart Rate  
30

31 548 KHSC: Kingston Health Sciences Centre  
32

33 549 KINARM: Kinesiological Instrument for Normal and Altered Reaching Movement  
34

35 550 ICU: Intensive Care Unit  
36

37 551 MAP: Mean Arterial Pressure  
38

39 552 MAP<sub>OPT</sub>: Optimal Mean Arterial Pressure  
40

41 553 NIRS: Near-infrared Spectroscopy  
42

43 554 OH: Object Hit  
44

45 555 OHA: Object Hit and Avoid  
46

47 556 pCO<sub>2</sub>: Arterial Partial Pressure of Carbon Dioxide  
48

49 557 PICS: Post-intensive Care Syndrome  
50

51 558 pO<sub>2</sub>: Arterial Partial Pressure of Oxygen  
52

53 559 RASS: Richmond Agitation and Sedation Scale  
54

55 560 RBANS: Repeatable Battery for the Assessment of Neuropsychological Status  
56

57 561 rSO<sub>2</sub>: Regional Cerebral Oxygenation  
58  
59  
60

1  
2  
3 562 RVGR: Reverse Visually Guided Reaching  
4

5 563 SpO<sub>2</sub>: Peripheral Oxygen Saturation  
6

7 564 SS: Spatial Span  
8

9 565 SDM: Substitute Decision Maker  
10

11 566 VGR: Visually Guided Reaching  
12

13 567  
14

15 568 **Authors' contributions:**

16 569 MDW participated in study design, statistical planning, and drafting of the manuscript.  
17

18 570 JK participated in study design and drafting of the manuscript.  
19

20 571 KL participated in study design and drafting of the manuscript.  
21

22 572 DM participated in study design and drafting of the manuscript.  
23

24 573 JM participated in study design and drafting of the manuscript.  
25

26 574 MH participated in study design and drafting of the manuscript.  
27

28 575 SHS participated in study design and drafting of the manuscript.  
29

30 576 AD participated in sample size calculations and finalizing of the statistical plan.  
31

32 577 JAJ participated in statistical planning and drafting of the manuscript.  
33

34 578 IB participated in study design and drafting of the manuscript.  
35

36 579 MS participated in study design and drafting of the manuscript.  
37

38 580 NO participated in study design and drafting of the manuscript.  
39

40 581 SE participated in study design and drafting of the manuscript.  
41

42 582 VM participated in study design and drafting of the manuscript.  
43

44 583 MC participated in study design and drafting of the manuscript.  
45

46 584 DG participated in study design and drafting of the manuscript.  
47

48 585 JGB is the primary investigator. He participated in study design and drafting of the manuscript.  
49

50 586  
51

52 587 **Funding statement:**

53 588 This work was supported by the Physician Services Incorporated and the Southeastern Ontario  
54 589 Academic Medical Organization New Clinician Scientist Program for which JGB was the  
55  
56  
57  
58  
59  
60



1  
2  
3 590 recipient. The funding agencies had no role in the design of this study, data collection, or data  
4 591 analysis.

5  
6 592

7  
8 **593 Competing interests statement.**

9  
10 594 Mr. Michael D. Wood has nothing to disclose.

11  
12 595 Ms. Jasmine Khan has nothing to disclose.

13  
14 596 Dr. Kevin Lee has nothing to disclose.

15  
16 597 Dr. David Maslove has nothing to disclose.

17  
18 598 Dr. John Muscedere is the scientific director of the Canadian Frailty Network.

19  
20 599 Ms. Miranda Hunt has nothing to disclose.

21  
22 600 Dr. Stephen Scott is the cofounder of BKIN Technologies, the manufacturer of the KINARM  
23 601 device.

24  
25 602 Mr. Andrew Day has nothing to disclose.

26  
27 603 Dr. Jill Jacobson has nothing to disclose.

28  
29 604 Dr. Ian Ball receives a stipend from the Trillium Gift of Life Network to support his role as a  
30 605 Regional Medical Lead.

31  
32 606 Dr. Niamh O'Regan received funding from the Academic Medical Organization of Southwestern  
33 607 Ontario.

34  
35 608 Dr. Marat Slessarev receives a stipend from the Trillium Gift of Life Network to support his role  
36 609 as a Hospital Donation Physician.

37  
38 610 Dr. Victoria McCredie has nothing to disclose.

39  
40 611 Dr. Shane English has nothing to disclose.

41  
42 612 Dr. Donald Griesdale is funded through a Health-Professional Investigator Award from the  
43 613 Michael Smith Foundation for Health Research.

44  
45 614 Dr. J. Gordon Boyd receives a stipend from the Trillium Gift of Life Network to support his role  
46 615 as a Regional Medical Lead.

47  
48 616  
49  
50  
51  
52  
53  
54  
55  
56  
57  
58  
59  
60



1  
2  
3 **617 Figure Legends:**  
4

5 **618 Figure 1.** A visual representation of the CONFOCAL2 study design from enrolment to 3- and  
6 **619** 12-month follow up assessments.  
7

8 **620 Figure 2.** Three-dimensional animated representation of the KINARM End-Point robotic set-up  
9 **621** used at 3- and 12-month follow up assessments.  
10

11 **622 Figure 3A.** Simplified line graph (24 hours instead of the full 72 hour recording period)  
12 **623** illustrating the sliding window correlation between mean arterial pressure and regional cerebral  
13 **624** oxygenation for an individual patient over a 24 period of recording. *Note.* The black rectangle  
14 **625** represents a 60-minute window that moves forward 1-minute at a time until the recording period  
15 **626** is completed. **B.** Scatter plot illustrating a time dependent positive association between mean  
16 **627** arterial pressure and regional cerebral oxygenation. *Note.* Black dots represent data collected for  
17 **628** an individual patient over 24 hours, with the blue line representing a linear model fit to the data,  
18 **629** and the grey shaded region representing the 95% confidence interval. **C.** Scatter plot indicating  
19 **630** the time varying association between mean arterial pressure and regional cerebral oxygenation  
20 **631** represented as the cerebral oximetry index (COx) over an individual patient's 24-hour recording  
21 **632** period. *Note.* Statistically significant ( $p < 0.0001$ ) positive Cox values represent dysfunctional  
22 **633** cerebral autoregulation, with negative or near zero values indicating intact cerebral  
23 **634** autoregulation.  
24  
25  
26  
27

28 **635 Figure 4.** Line graph of the high frequency vital sign recordings indicates the highly variable  
29 **636** relationships with regional cerebral oxygenation over the 72-hour period of recording. *Note.* The  
30 **637** figure represents a single patient's ICU recording. rSO<sub>2</sub> = Regional cerebral oxygenation; HR =  
31 **638** Heart rate; SpO<sub>2</sub> = Arterial oxygen saturation; artMAP= Mean arterial pressure from an arterial  
32 **639** line.  
33  
34

35 **640 Figure 5.** A power curve indicating the study sample size, and the respective statistical power, to  
36 **641** assess the primary study outcome. *Note.* Red dots represent the sample size needed for a given  
37 **642** statistical power. The primary sample size was calculated using the following multivariate  
38 **643** regression model parameters: 10 independent variables tested, controlling for 9 additional  
39 **644** covariates, power = 0.90, R<sup>2</sup> = 0.050,  $\alpha$  = 0.05, which would require a sample size of 400.  
40  
41  
42  
43  
44  
45  
46  
47  
48  
49  
50  
51  
52  
53  
54  
55  
56  
57  
58  
59  
60

1  
2  
3  
4  
5  
6  
7  
8  
9  
10  
11  
12  
13  
14  
15  
16  
17  
18  
19  
20  
21  
22  
23  
24  
25  
26  
27  
28  
29  
30  
31  
32  
33  
34  
35  
36  
37  
38  
39  
40  
41  
42  
43  
44  
45  
46  
47  
48  
49  
50  
51  
52  
53  
54  
55  
56  
57  
58  
59  
60

**Inclusion Criteria**

- >17 years old
- >24hr mechanical ventilation due to respiratory failure and/or shock

**Exclusion Criteria**

- Neurological/neurosurgical admitting diagnosis
- <24hr life expectancy
- Inability to participate in follow-up

Enrolment

**Covariates Collected**

- Pre-existing cognitive dysfunction
- History of hypertension
- History of alcohol abuse
- Severity of Illness (APACHE II)
- Sedative + narcotic dose
- Blood urea nitrogen
- Length of ICU stay

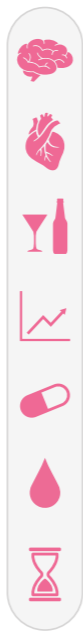

**Blood Samples**

- pH
- pO2
- pCO2
- Hb conc.

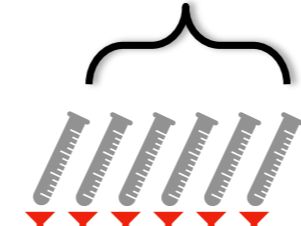

0 hours

72 hours

30 days

3 months

12 months

**Vitals**

**NIRS**

**Delirium**

CAM-ICU (ICU)  
bCAM (Ward)

**+ Severity**

**RBANS**

**KINARM**

**RBANS**

**KINARM**

1  
2  
3  
4  
5  
6  
7  
8  
9  
10  
11  
12  
13  
14  
15  
16  
17  
18  
19  
20  
21  
22  
23  
24  
25  
26  
27  
28  
29  
30  
31  
32  
33  
34  
35  
36  
37  
38  
39  
40  
41  
42  
43  
44  
45  
46

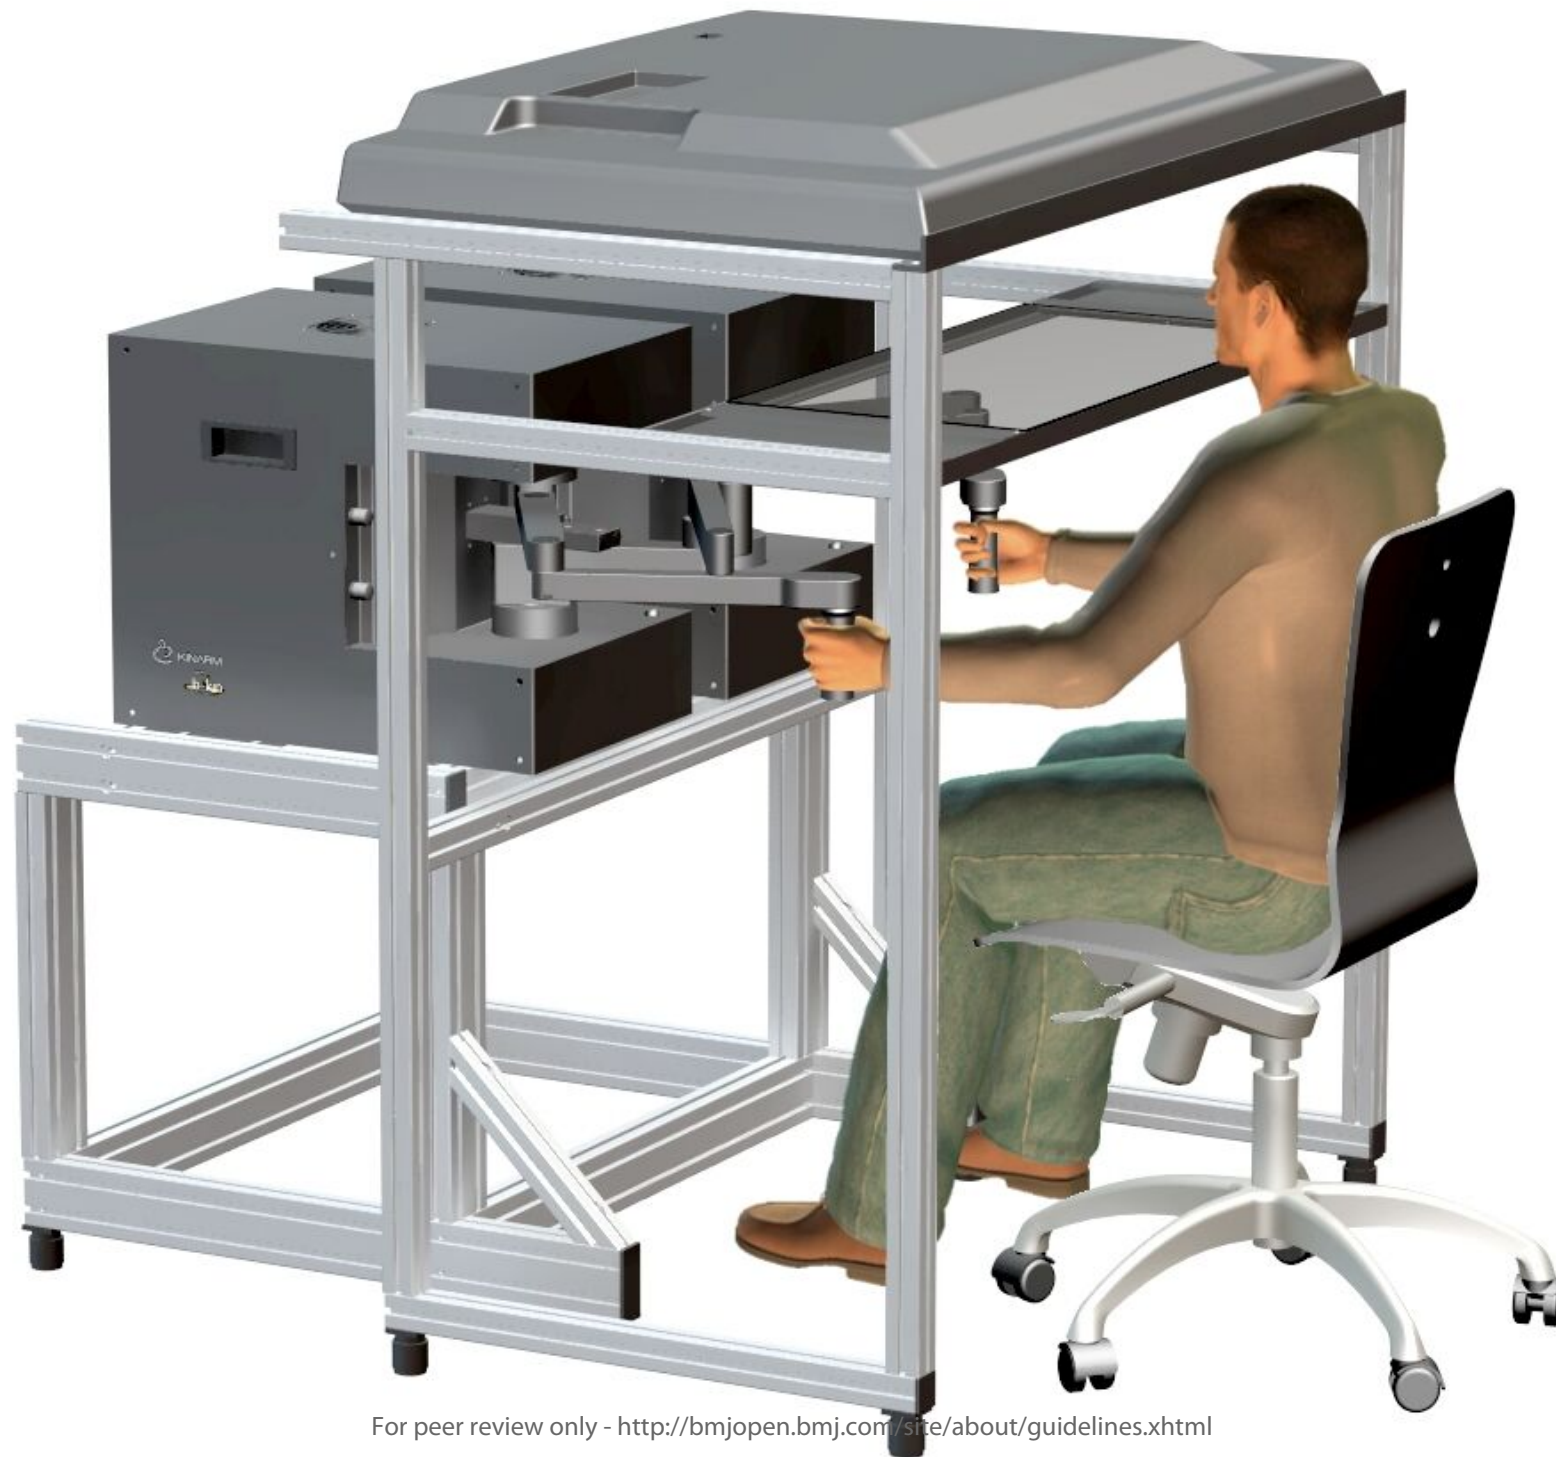

1  
2  
3  
4  
5  
6  
7  
8  
9  
10  
11  
12  
13  
14  
15  
16  
17  
18  
19  
20  
21  
22  
23  
24 B)  
25  
26  
27  
28  
29  
30  
31  
32  
33  
34  
35  
36  
37  
38  
39  
40  
41  
42  
43  
44  
45  
46  
47  
48  
49  
50  
51  
52  
53  
54  
55  
56  
57  
58  
59  
60 A)

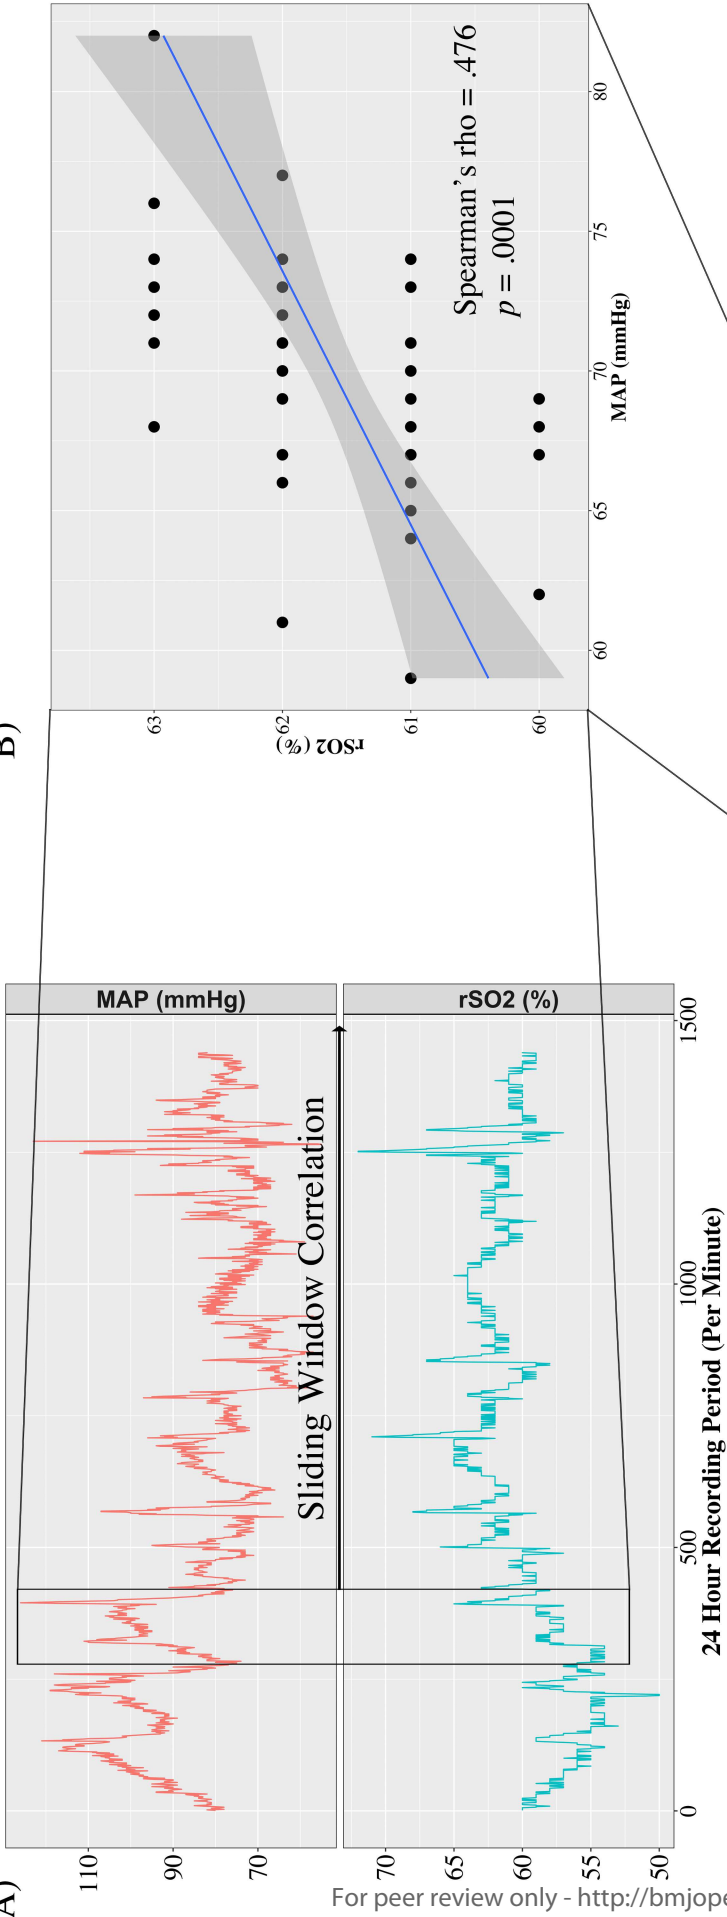

Enrolment

24 Hours

48 Hours

72 Hours

1  
2  
3  
4  
5  
6  
7  
8  
9  
10  
11  
12  
13  
14  
15  
16  
17  
18  
19  
20  
21  
22  
23  
24  
25  
26  
27  
28  
29  
30  
31  
32  
33  
34  
35  
36  
37  
38  
39  
40  
41  
42  
43  
44  
45  
46  
47

110

90

70

50

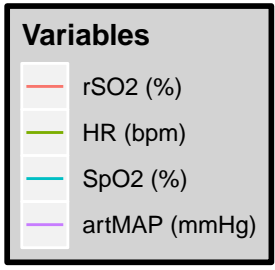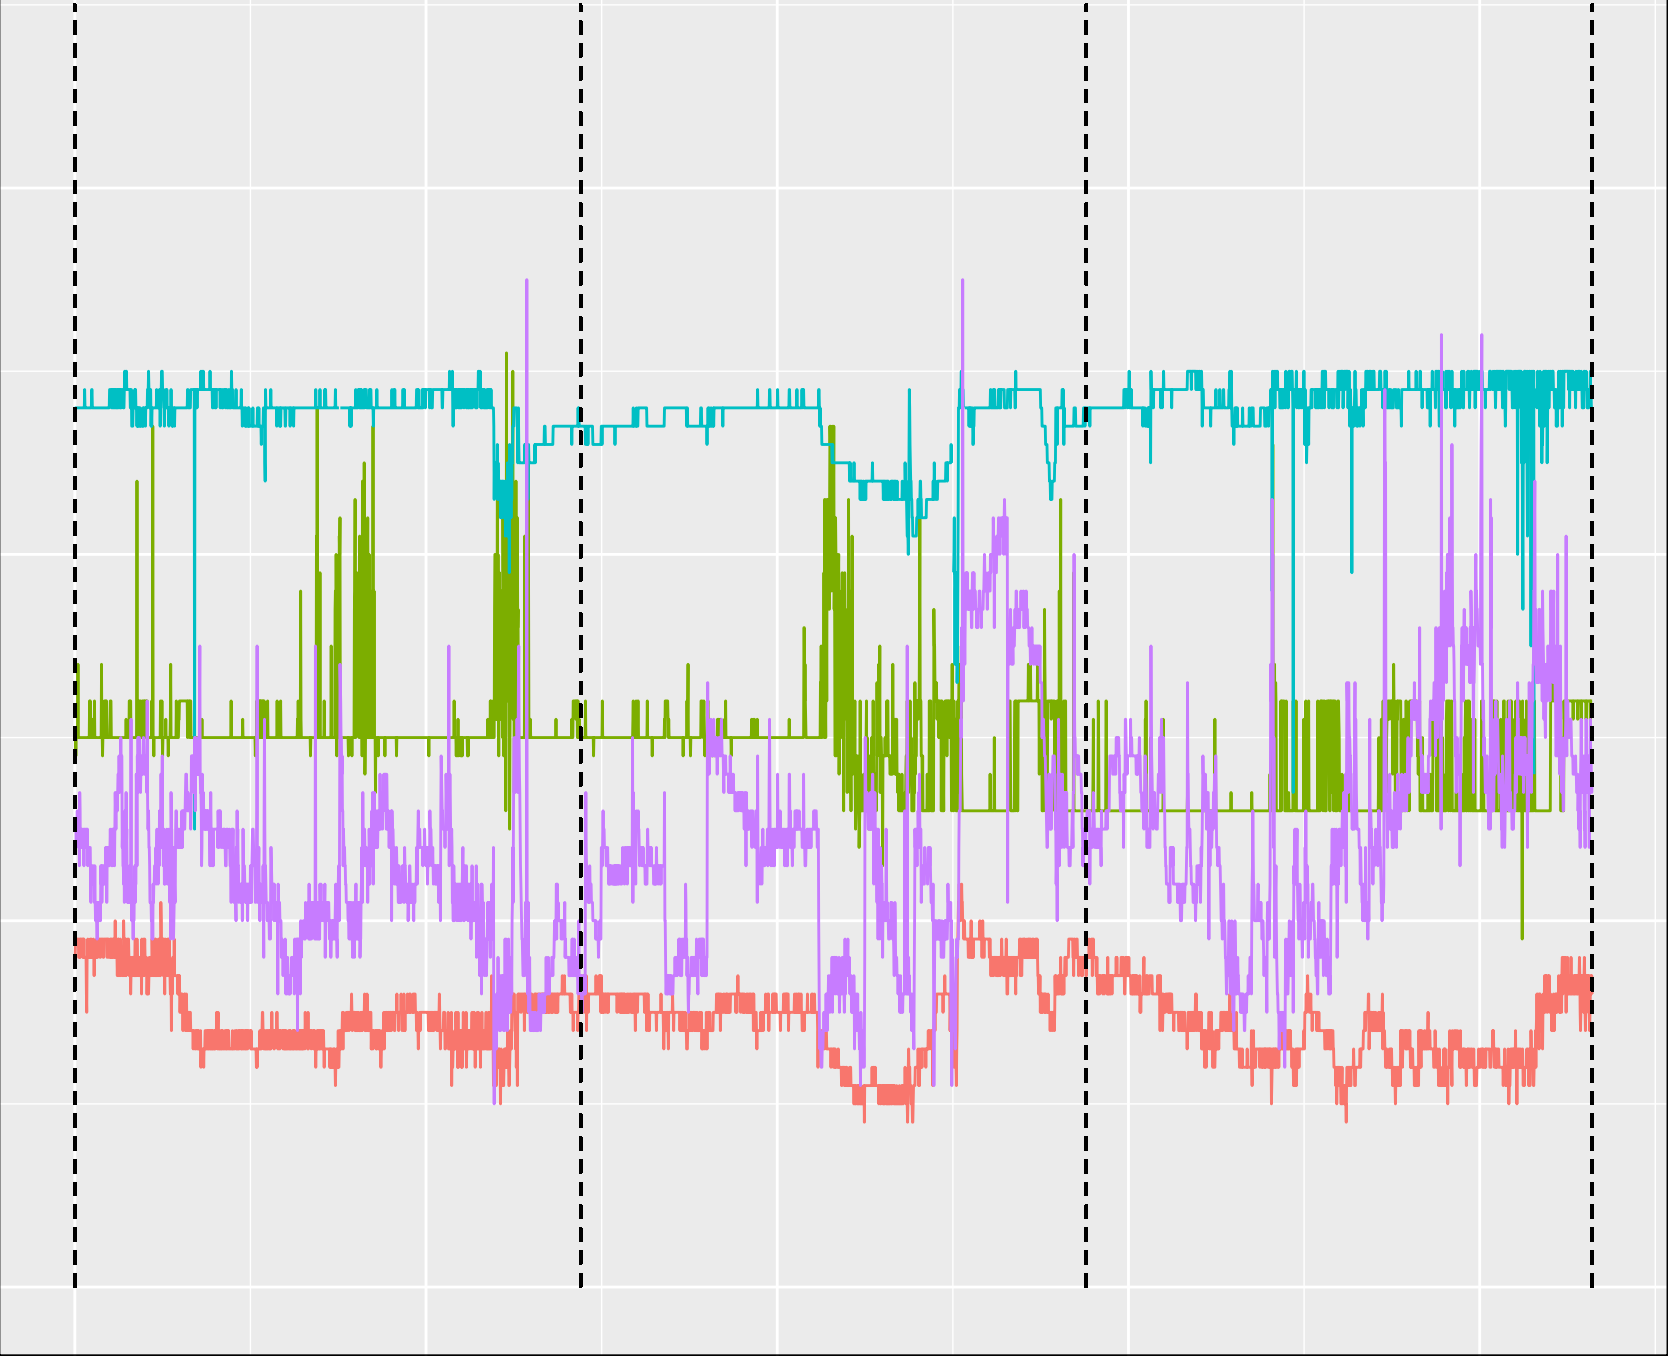

For peer review only - <http://bmjopen.bmj.com/site/about/guidelines.xhtml>

**72 Hour Recording Period (Per Minute)**

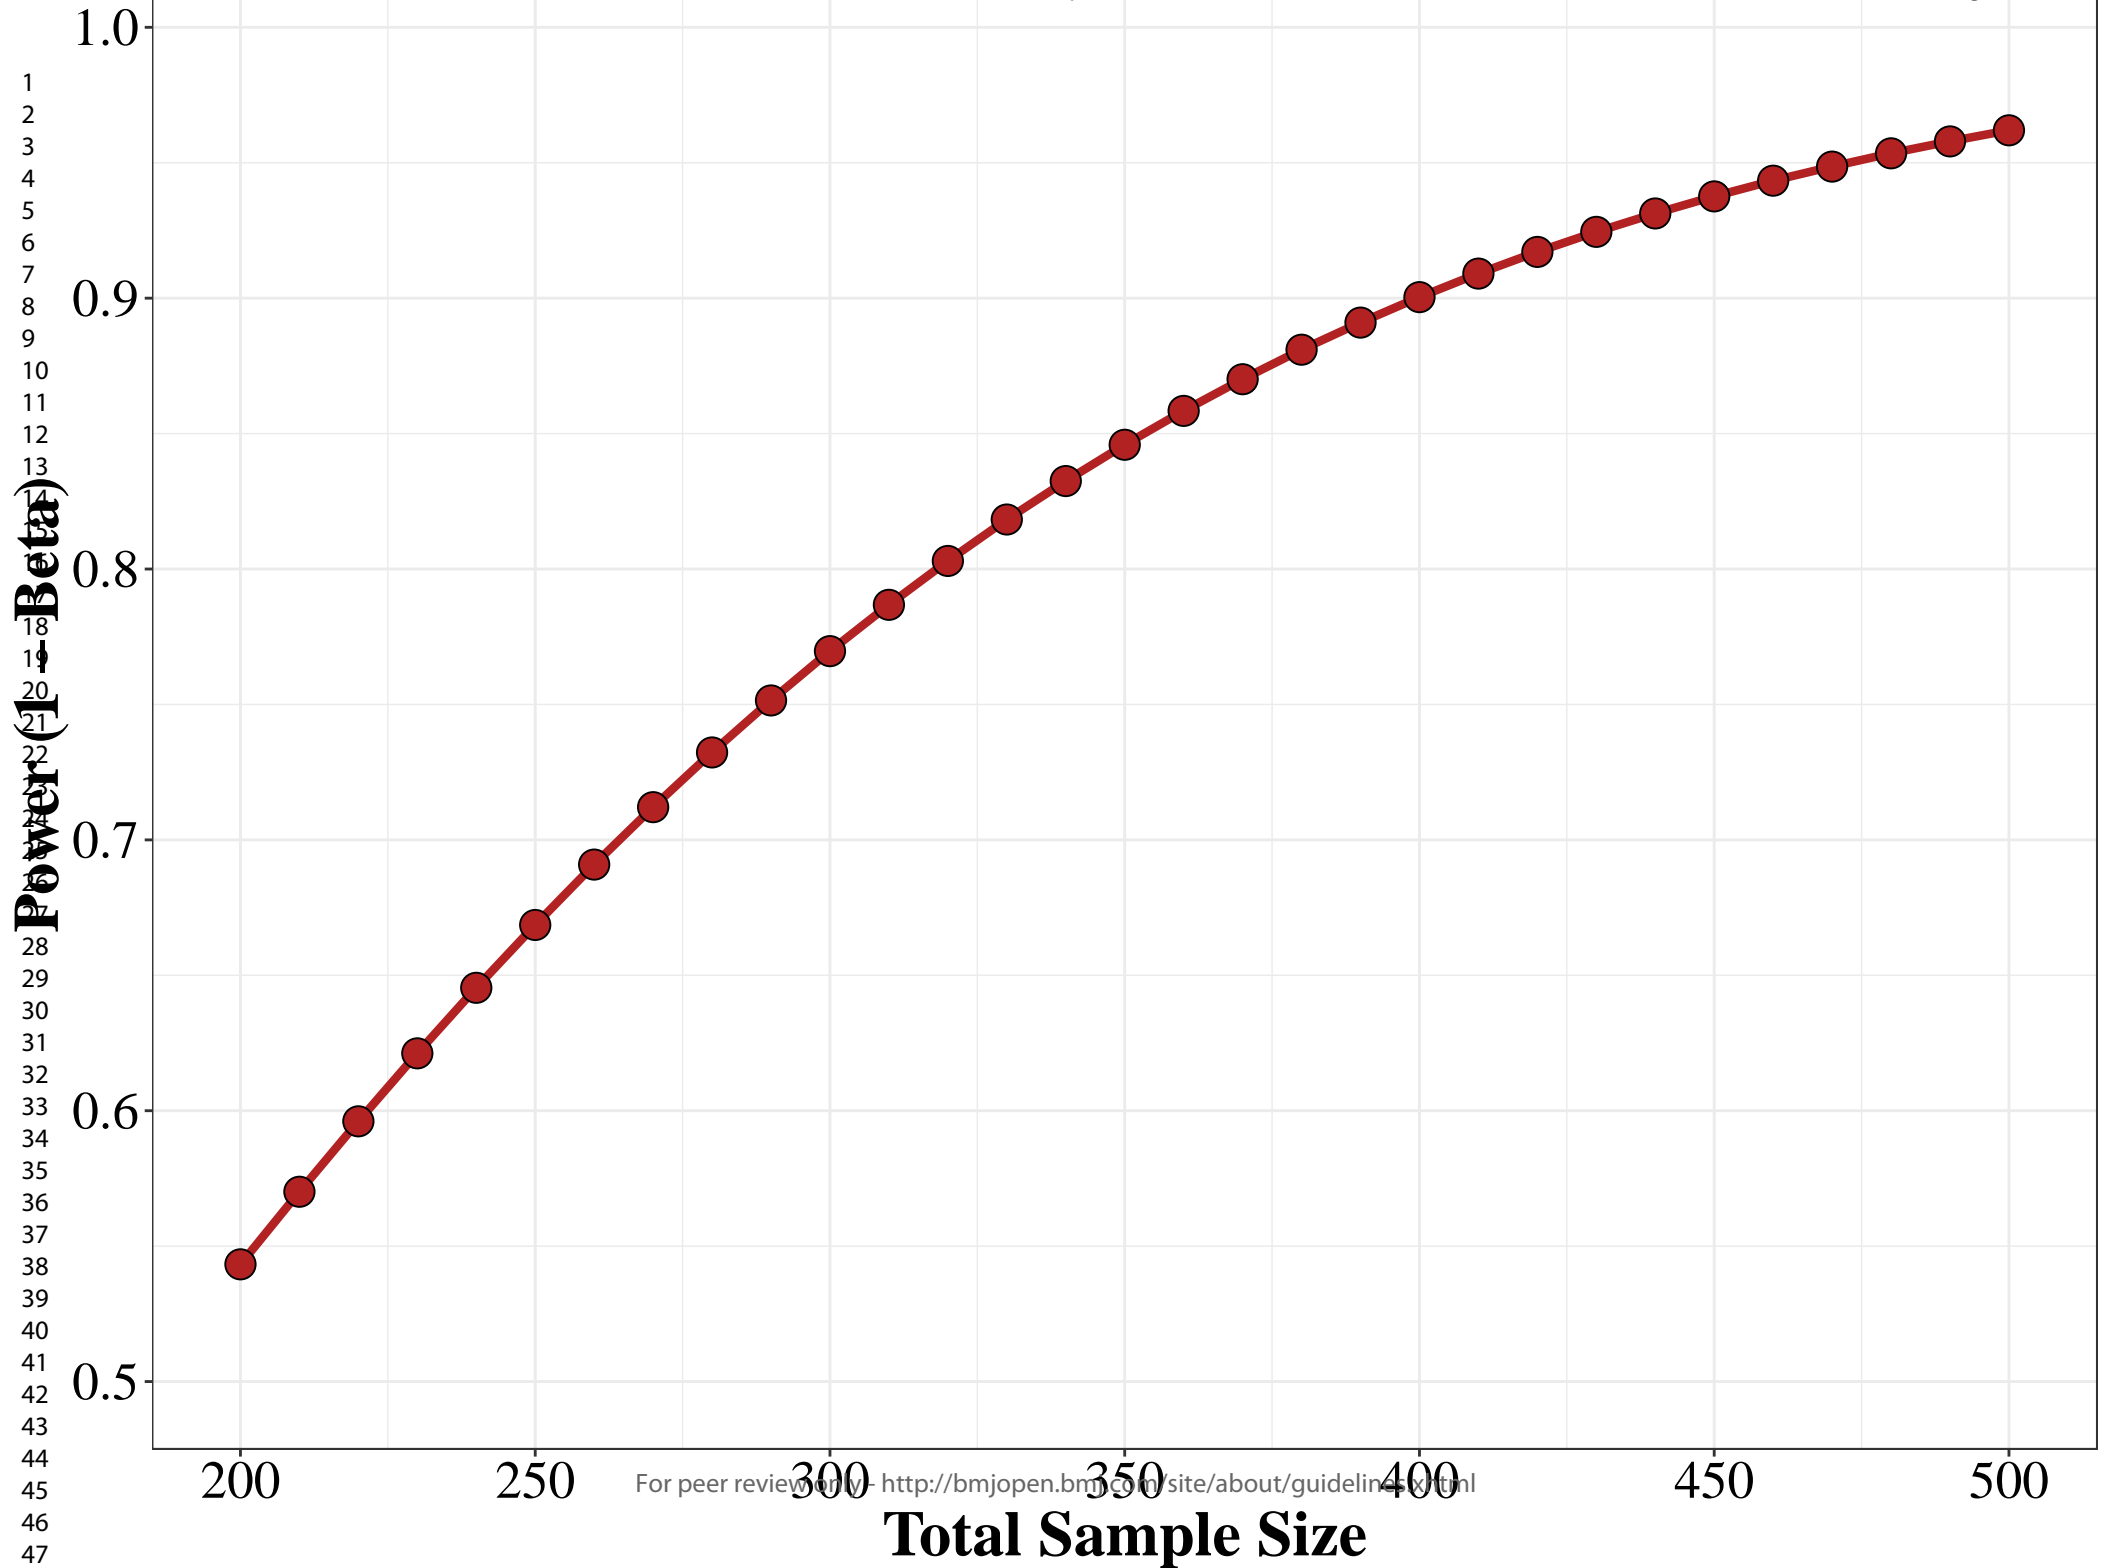

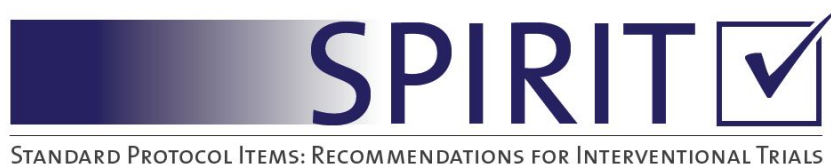

STANDARD PROTOCOL ITEMS: RECOMMENDATIONS FOR INTERVENTIONAL TRIALS

SPIRIT 2013 Checklist: Recommended items to address in a clinical trial protocol and related documents\*

| Section/item                      | Item No | Description                                                                                                                                                                                                                                                                              | Page Number on which item is reported |
|-----------------------------------|---------|------------------------------------------------------------------------------------------------------------------------------------------------------------------------------------------------------------------------------------------------------------------------------------------|---------------------------------------|
| <b>Administrative information</b> |         |                                                                                                                                                                                                                                                                                          |                                       |
| Title                             | 1       | Descriptive title identifying the study design, population, interventions, and, if applicable, trial acronym                                                                                                                                                                             | 1                                     |
| Trial registration                | 2a      | Trial identifier and registry name. If not yet registered, name of intended registry                                                                                                                                                                                                     | 4                                     |
|                                   | 2b      | All items from the World Health Organization Trial Registration Data Set                                                                                                                                                                                                                 | N/A                                   |
| Protocol version                  | 3       | Date and version identifier                                                                                                                                                                                                                                                              | N/A                                   |
| Funding                           | 4       | Sources and types of financial, material, and other support                                                                                                                                                                                                                              | 25-26                                 |
| Roles and responsibilities        | 5a      | Names, affiliations, and roles of protocol contributors                                                                                                                                                                                                                                  | 1-2,25                                |
|                                   | 5b      | Name and contact information for the trial sponsor                                                                                                                                                                                                                                       | 1                                     |
|                                   | 5c      | Role of study sponsor and funders, if any, in study design; collection, management, analysis, and interpretation of data; writing of the report; and the decision to submit the report for publication, including whether they will have ultimate authority over any of these activities | 25-26                                 |
|                                   | 5d      | Composition, roles, and responsibilities of the coordinating centre, steering committee, endpoint adjudication committee, data management team, and other individuals or groups overseeing the trial, if applicable (see Item 21a for data monitoring committee)                         | 9-10                                  |
| <b>Introduction</b>               |         |                                                                                                                                                                                                                                                                                          |                                       |



|                                                           |     |                                                                                                                                                                                                                                                                                                                                                                                |       |
|-----------------------------------------------------------|-----|--------------------------------------------------------------------------------------------------------------------------------------------------------------------------------------------------------------------------------------------------------------------------------------------------------------------------------------------------------------------------------|-------|
| Background and rationale                                  | 6a  | Description of research question and justification for undertaking the trial, including summary of relevant studies (published and unpublished) examining benefits and harms for each intervention                                                                                                                                                                             | 6-7   |
|                                                           | 6b  | Explanation for choice of comparators                                                                                                                                                                                                                                                                                                                                          | 6-7   |
| Objectives                                                | 7   | Specific objectives or hypotheses                                                                                                                                                                                                                                                                                                                                              | 7     |
| Trial design                                              | 8   | Description of trial design including type of trial (eg, parallel group, crossover, factorial, single group), allocation ratio, and framework (eg, superiority, equivalence, noninferiority, exploratory)                                                                                                                                                                      | 7     |
| <b>Methods: Participants, interventions, and outcomes</b> |     |                                                                                                                                                                                                                                                                                                                                                                                |       |
| Study setting                                             | 9   | Description of study settings (eg, community clinic, academic hospital) and list of countries where data will be collected. Reference to where list of study sites can be obtained                                                                                                                                                                                             | 8     |
| Eligibility criteria                                      | 10  | Inclusion and exclusion criteria for participants. If applicable, eligibility criteria for study centres and individuals who will perform the interventions (eg, surgeons, psychotherapists)                                                                                                                                                                                   | 8     |
| Interventions                                             | 11a | Interventions for each group with sufficient detail to allow replication, including how and when they will be administered                                                                                                                                                                                                                                                     | N/A   |
|                                                           | 11b | Criteria for discontinuing or modifying allocated interventions for a given trial participant (eg, drug dose change in response to harms, participant request, or improving/worsening disease)                                                                                                                                                                                 | N/A   |
|                                                           | 11c | Strategies to improve adherence to intervention protocols, and any procedures for monitoring adherence (eg, drug tablet return, laboratory tests)                                                                                                                                                                                                                              | N/A   |
|                                                           | 11d | Relevant concomitant care and interventions that are permitted or prohibited during the trial                                                                                                                                                                                                                                                                                  | N/A   |
| Outcomes                                                  | 12  | Primary, secondary, and other outcomes, including the specific measurement variable (eg, systolic blood pressure), analysis metric (eg, change from baseline, final value, time to event), method of aggregation (eg, median, proportion), and time point for each outcome. Explanation of the clinical relevance of chosen efficacy and harm outcomes is strongly recommended | 16-18 |



|                                                                     |     |                                                                                                                                                                                                                                                                                                                                                          |       |
|---------------------------------------------------------------------|-----|----------------------------------------------------------------------------------------------------------------------------------------------------------------------------------------------------------------------------------------------------------------------------------------------------------------------------------------------------------|-------|
| Participant timeline                                                | 13  | Time schedule of enrolment, interventions (including any run-ins and washouts), assessments, and visits for participants. A schematic diagram is highly recommended (see Figure)                                                                                                                                                                         | 10-13 |
| Sample size                                                         | 14  | Estimated number of participants needed to achieve study objectives and how it was determined, including clinical and statistical assumptions supporting any sample size calculations                                                                                                                                                                    | 14-15 |
| Recruitment                                                         | 15  | Strategies for achieving adequate participant enrolment to reach target sample size                                                                                                                                                                                                                                                                      | 14-15 |
| <b>Methods: Assignment of interventions (for controlled trials)</b> |     |                                                                                                                                                                                                                                                                                                                                                          |       |
| Allocation:                                                         |     |                                                                                                                                                                                                                                                                                                                                                          |       |
| Sequence generation                                                 | 16a | Method of generating the allocation sequence (eg, computer-generated random numbers), and list of any factors for stratification. To reduce predictability of a random sequence, details of any planned restriction (eg, blocking) should be provided in a separate document that is unavailable to those who enrol participants or assign interventions | N/A   |
| Allocation concealment mechanism                                    | 16b | Mechanism of implementing the allocation sequence (eg, central telephone; sequentially numbered, opaque, sealed envelopes), describing any steps to conceal the sequence until interventions are assigned                                                                                                                                                | N/A   |
| Implementation                                                      | 16c | Who will generate the allocation sequence, who will enrol participants, and who will assign participants to interventions                                                                                                                                                                                                                                | N/A   |
| Blinding (masking)                                                  | 17a | Who will be blinded after assignment to interventions (eg, trial participants, care providers, outcome assessors, data analysts), and how                                                                                                                                                                                                                | N/A   |
|                                                                     | 17b | If blinded, circumstances under which unblinding is permissible, and procedure for revealing a participant's allocated intervention during the trial                                                                                                                                                                                                     | N/A   |
| <b>Methods: Data collection, management, and analysis</b>           |     |                                                                                                                                                                                                                                                                                                                                                          |       |

|                                                          |                            |     |                                                                                                                                                                                                                                                                                                                                                                                                              |       |
|----------------------------------------------------------|----------------------------|-----|--------------------------------------------------------------------------------------------------------------------------------------------------------------------------------------------------------------------------------------------------------------------------------------------------------------------------------------------------------------------------------------------------------------|-------|
| 1<br>2<br>3<br>4<br>5<br>6<br>7<br>8<br>9<br>10<br>11    | Data collection methods    | 18a | Plans for assessment and collection of outcome, baseline, and other trial data, including any related processes to promote data quality (eg, duplicate measurements, training of assessors) and a description of study instruments (eg, questionnaires, laboratory tests) along with their reliability and validity, if known. Reference to where data collection forms can be found, if not in the protocol | 10-13 |
| 12<br>13<br>14<br>15<br>16<br>17                         |                            | 18b | Plans to promote participant retention and complete follow-up, including list of any outcome data to be collected for participants who discontinue or deviate from intervention protocols                                                                                                                                                                                                                    | 14-15 |
| 18<br>19<br>20<br>21<br>22<br>23<br>24<br>25             | Data management            | 19  | Plans for data entry, coding, security, and storage, including any related processes to promote data quality (eg, double data entry; range checks for data values). Reference to where details of data management procedures can be found, if not in the protocol                                                                                                                                            | 8-10  |
| 26<br>27<br>28<br>29<br>30<br>31                         | Statistical methods        | 20a | Statistical methods for analysing primary and secondary outcomes. Reference to where other details of the statistical analysis plan can be found, if not in the protocol                                                                                                                                                                                                                                     | 15-18 |
| 32<br>33<br>34                                           |                            | 20b | Methods for any additional analyses (eg, subgroup and adjusted analyses)                                                                                                                                                                                                                                                                                                                                     | 15-18 |
| 35<br>36<br>37<br>38<br>39<br>40                         |                            | 20c | Definition of analysis population relating to protocol non-adherence (eg, as randomised analysis), and any statistical methods to handle missing data (eg, multiple imputation)                                                                                                                                                                                                                              | 15-18 |
| 41<br>42                                                 | <b>Methods: Monitoring</b> |     |                                                                                                                                                                                                                                                                                                                                                                                                              |       |
| 43<br>44<br>45<br>46<br>47<br>48<br>49<br>50<br>51<br>52 | Data monitoring            | 21a | Composition of data monitoring committee (DMC); summary of its role and reporting structure; statement of whether it is independent from the sponsor and competing interests; and reference to where further details about its charter can be found, if not in the protocol. Alternatively, an explanation of why a DMC is not needed                                                                        | N/A   |
| 53<br>54<br>55<br>56<br>57<br>58<br>59<br>60             |                            | 21b | Description of any interim analyses and stopping guidelines, including who will have access to these interim results and make the final decision to terminate the trial                                                                                                                                                                                                                                      | N/A   |

|                                 |     |                                                                                                                                                                                                                                                                                     |      |
|---------------------------------|-----|-------------------------------------------------------------------------------------------------------------------------------------------------------------------------------------------------------------------------------------------------------------------------------------|------|
| Harms                           | 22  | Plans for collecting, assessing, reporting, and managing solicited and spontaneously reported adverse events and other unintended effects of trial interventions or trial conduct                                                                                                   | 20   |
| Auditing                        | 23  | Frequency and procedures for auditing trial conduct, if any, and whether the process will be independent from investigators and the sponsor                                                                                                                                         | N/A  |
| <b>Ethics and dissemination</b> |     |                                                                                                                                                                                                                                                                                     |      |
| Research ethics approval        | 24  | Plans for seeking research ethics committee/institutional review board (REC/IRB) approval                                                                                                                                                                                           | 9,20 |
| Protocol amendments             | 25  | Plans for communicating important protocol modifications (eg, changes to eligibility criteria, outcomes, analyses) to relevant parties (eg, investigators, REC/IRBs, trial participants, trial registries, journals, regulators)                                                    | N/A  |
| Consent or assent               | 26a | Who will obtain informed consent or assent from potential trial participants or authorised surrogates, and how (see Item 32)                                                                                                                                                        | 9-10 |
|                                 | 26b | Additional consent provisions for collection and use of participant data and biological specimens in ancillary studies, if applicable                                                                                                                                               | N/A  |
| Confidentiality                 | 27  | How personal information about potential and enrolled participants will be collected, shared, and maintained in order to protect confidentiality before, during, and after the trial                                                                                                | 9-10 |
| Declaration of interests        | 28  | Financial and other competing interests for principal investigators for the overall trial and each study site                                                                                                                                                                       | 26   |
| Access to data                  | 29  | Statement of who will have access to the final trial dataset, and disclosure of contractual agreements that limit such access for investigators                                                                                                                                     | 10   |
| Ancillary and post-trial care   | 30  | Provisions, if any, for ancillary and post-trial care, and for compensation to those who suffer harm from trial participation                                                                                                                                                       | N/A  |
| Dissemination policy            | 31a | Plans for investigators and sponsor to communicate trial results to participants, healthcare professionals, the public, and other relevant groups (eg, via publication, reporting in results databases, or other data sharing arrangements), including any publication restrictions | 20   |

|                            |     |                                                                                                                                                                                                |     |
|----------------------------|-----|------------------------------------------------------------------------------------------------------------------------------------------------------------------------------------------------|-----|
|                            | 31b | Authorship eligibility guidelines and any intended use of professional writers                                                                                                                 | 20  |
|                            | 31c | Plans, if any, for granting public access to the full protocol, participant-level dataset, and statistical code                                                                                | 20  |
| <b>Appendices</b>          |     |                                                                                                                                                                                                |     |
| Informed consent materials | 32  | Model consent form and other related documentation given to participants and authorised surrogates                                                                                             | N/A |
| Biological specimens       | 33  | Plans for collection, laboratory evaluation, and storage of biological specimens for genetic or molecular analysis in the current trial and for future use in ancillary studies, if applicable | N/A |

\*It is strongly recommended that this checklist be read in conjunction with the SPIRIT 2013 Explanation & Elaboration for important clarification on the items. Amendments to the protocol should be tracked and dated. The SPIRIT checklist is copyrighted by the SPIRIT Group under the Creative Commons "[Attribution-NonCommercial-NoDerivs 3.0 Unported](#)" license.

# BMJ Open

## Assessing the relationship between near-infrared spectroscopy derived regional cerebral oxygenation and neurological dysfunction in critically ill adults: a prospective observational multi-centre protocol, on behalf of the Canadian Critical Care Trials Group

|                                 |                                                                                                                                                                                                                                                                                                                                                                                                                                                                                                                                                                                                                                                                                                                                                                                                                                                                                                                                                                                                                                                                                                                                                                                                                                                                                                                                                                                               |
|---------------------------------|-----------------------------------------------------------------------------------------------------------------------------------------------------------------------------------------------------------------------------------------------------------------------------------------------------------------------------------------------------------------------------------------------------------------------------------------------------------------------------------------------------------------------------------------------------------------------------------------------------------------------------------------------------------------------------------------------------------------------------------------------------------------------------------------------------------------------------------------------------------------------------------------------------------------------------------------------------------------------------------------------------------------------------------------------------------------------------------------------------------------------------------------------------------------------------------------------------------------------------------------------------------------------------------------------------------------------------------------------------------------------------------------------|
| Journal:                        | <i>BMJ Open</i>                                                                                                                                                                                                                                                                                                                                                                                                                                                                                                                                                                                                                                                                                                                                                                                                                                                                                                                                                                                                                                                                                                                                                                                                                                                                                                                                                                               |
| Manuscript ID                   | bmjopen-2019-029189.R2                                                                                                                                                                                                                                                                                                                                                                                                                                                                                                                                                                                                                                                                                                                                                                                                                                                                                                                                                                                                                                                                                                                                                                                                                                                                                                                                                                        |
| Article Type:                   | Protocol                                                                                                                                                                                                                                                                                                                                                                                                                                                                                                                                                                                                                                                                                                                                                                                                                                                                                                                                                                                                                                                                                                                                                                                                                                                                                                                                                                                      |
| Date Submitted by the Author:   | 24-May-2019                                                                                                                                                                                                                                                                                                                                                                                                                                                                                                                                                                                                                                                                                                                                                                                                                                                                                                                                                                                                                                                                                                                                                                                                                                                                                                                                                                                   |
| Complete List of Authors:       | Wood, Michael; Queen's University, Centre For Neuroscience Studies<br>Khan, Jasmine; Queen's University, Centre for Neuroscience Studies<br>Lee, Kevin; Queen's University, School of Medicine<br>Maslove, David M; Queen's University, Critical Care Medicine<br>Muscedere, John; Kingston General Hospital, Critical Care Medicine<br>Hunt, Miranda; Queen's University, Critical Care Medicine<br>Scott, Stephen; Queen's University, Centre for Neuroscience Studies<br>Day, Andrew; Queen's University, Department of Community health and Epidemiology and CERU<br>Jacobson, Jill; Queen's University, Psychology<br>Ball, Ian; London Health Sciences Centre, Medicine<br>Slessarev, Marat; Western University, Medicine, Division of Geriatric Medicine<br>O'Regan, Niamh; Western University, Medicine, Division of Geriatric Medicine<br>English, Shane; University of Ottawa, Medicine (Critical Care); Ottawa Hospital Research Institute, Clinical Epidemiology Program<br>McCredie, Victoria; University of Toronto; Toronto Western Hospital, University Health Network, Medicine; Critical Care<br>Chasse, Michaël; Centre Hospitalier de L'Université de Montreal, Medicine (Critical Care)<br>Griesdale, Donald; University of British Columbia, Department of Anesthesiology, Pharmacology & Therapeutics<br>Boyd, John; Kingston General Hospital, Critical Care Medicine |
| <b>Primary Subject Heading</b>: | Intensive care                                                                                                                                                                                                                                                                                                                                                                                                                                                                                                                                                                                                                                                                                                                                                                                                                                                                                                                                                                                                                                                                                                                                                                                                                                                                                                                                                                                |
| Secondary Subject Heading:      | Neurology                                                                                                                                                                                                                                                                                                                                                                                                                                                                                                                                                                                                                                                                                                                                                                                                                                                                                                                                                                                                                                                                                                                                                                                                                                                                                                                                                                                     |
| Keywords:                       | Near-infrared spectroscopy, Cerebral autoregulation, KINARM, Delirium, Post-intensive care syndrome, RBANS                                                                                                                                                                                                                                                                                                                                                                                                                                                                                                                                                                                                                                                                                                                                                                                                                                                                                                                                                                                                                                                                                                                                                                                                                                                                                    |

Note: The following files were submitted by the author for peer review, but cannot be converted to PDF. You must view these files (e.g. movies) online.

1  
2  
3  
4  
5  
6  
7  
8  
9  
10  
11  
12  
13  
14  
15  
16  
17  
18  
19  
20  
21  
22  
23  
24  
25  
26  
27  
28  
29  
30  
31  
32  
33  
34  
35  
36  
37  
38  
39  
40  
41  
42  
43  
44  
45  
46  
47  
48  
49  
50  
51  
52  
53  
54  
55  
56  
57  
58  
59  
60

Supplemental Figure 1.gif

SCHOLARONE™  
Manuscripts

1  
2  
3  
4 1  
5 2 Title: Assessing the relationship between near-infrared spectroscopy derived  
6 3 regional cerebral oxygenation and neurological dysfunction in critically ill  
7 4 adults: a prospective observational multi-centre protocol, on behalf of the  
8 5 Canadian Critical Care Trials Group  
9 6  
10 7

11 8 Authors: The Cerebral Oxygenation and Neurological Outcomes Following  
12 9 Critical Illness (CONFOCAL) Research Group  
13 10  
14 11

15 12 Michael D. Wood, PhD<sup>1</sup>, Jasmine Khan, BS<sup>1</sup>, Kevin F. H. Lee, PhD<sup>2</sup>,  
16 13 David Maslove, MSc, MD<sup>3,4</sup>, John Muscedere, MD<sup>3</sup>, Miranda Hunt, BA<sup>3</sup>  
17 14 Stephen H. Scott, PhD<sup>1</sup>, Andrew G. Day, MSc<sup>5</sup>, Jill A. Jacobson, PhD<sup>6</sup>  
18 15 Ian Ball, MD, MSc<sup>7</sup>, Marat Slessarev, MD, MSc<sup>7</sup>, Niamh O'Regan, MB  
19 16 BCh BAO, PhD<sup>7</sup>, Shane English, MD, MSc<sup>8,9</sup>, Victoria  
20 17 McCredie, MBChB, PhD<sup>10,11</sup>, Michael Chasse, MD, PhD<sup>12</sup>, Donald  
21 18 Griesdale, MD, MPH<sup>13</sup>, J. Gordon Boyd, MD, PhD<sup>1,3,4</sup>  
22 19  
23 20

24 21 Affiliations: <sup>1</sup>Centre for Neuroscience Studies, Queen's University, Kingston, ON,  
25 22 Canada  
26 23 <sup>2</sup>School of Medicine, Queen's University, Kingston, ON, Canada  
27 24 <sup>3</sup>Dept. of Critical Care Medicine, Queen's University, Kingston, ON,  
28 25 Canada  
29 26 <sup>4</sup>Dept. of Medicine, Queen's University, Kingston, ON, Canada  
30 27 <sup>5</sup>Kingston General Hospital Research Institute, Kingston, ON, Canada  
31 28 <sup>6</sup>Dept. of Psychology, Queen's University, Kingston, ON, Canada  
32 29 <sup>7</sup>Dept. of Medicine, Division of Geriatric Medicine, Western University,  
33 30 London, ON, Canada  
34 31 <sup>8</sup> Dept. of Medicine (Critical Care), University of Ottawa, Ottawa, ON,  
35 32 Canada  
36 33 <sup>9</sup>Clinical Epidemiology Program, Ottawa Hospital Research  
37 34 Institute, Ottawa ON, Canada  
38 35 <sup>10</sup>Interdepartmental Division of Critical Care Medicine, Department of  
39 36 Medicine, University of Toronto, Toronto, ON  
40 37 <sup>11</sup>Toronto Western Hospital, University Health Network, Toronto, ON  
41 38 <sup>12</sup> Dept. of Medicine (Critical Care), Université de Montreal, Montreal,  
42 39 QC, Canada  
43 40 <sup>13</sup>Department of Anesthesiology, Pharmacology & Therapeutics,  
44 41 University of British Columbia, Vancouver, BC, Canada  
45 42  
46 43

47 44 Corresponding  
48 45 Author:  
49 46

50 47 J. Gordon Boyd, MD, PhD, FRCPC  
51 48 Associate Professor  
52 49 Dept. of Critical Care Medicine  
53 50 Davies 2, Kingston General Hospital  
54 51 76 Stuart Street, Kingston, ON, Canada K7L 2V7  
55 52 Tel: 613-549-6666 X 6228  
56 53  
57 54  
58 55  
59 56  
60 57

1  
2  
3  
4  
5  
6  
7  
8  
9  
10  
11  
12  
13  
14  
15  
16  
17  
18  
19  
20  
21  
22  
23  
24  
25  
26  
27  
28  
29  
30  
31  
32  
33  
34  
35  
36  
37  
38  
39  
40  
41  
42  
43  
44  
45  
46  
47  
48  
49  
50  
51  
52  
53  
54  
55  
56  
57  
58  
59  
60

Email: [gordon.boyd@kingstonhsc.ca](mailto:gordon.boyd@kingstonhsc.ca)

For peer review only



**Abstract:**

*Introduction:* Survivors of critical illness frequently exhibit acute and chronic neurological complications. The underlying etiology of this dysfunction remains unknown but may be associated with cerebral ischemia. This study will use near-infrared spectroscopy (NIRS) to non-invasively quantify regional cerebral oxygenation (rSO<sub>2</sub>) to assess the association between poor rSO<sub>2</sub> during the first 72 hours of critical illness with delirium severity, as well as long-term sensorimotor and cognitive impairment among intensive care unit (ICU) survivors. Further, the physiological determinants of rSO<sub>2</sub> will be examined.

*Methods and analysis:* This multi-centre prospective observational study will consider adult patients ( $\geq 18$  years old) eligible for enrolment if within 24 hours of ICU admission, they require mechanical ventilation, and/or vasopressor support. For 72 hours, rSO<sub>2</sub> will be continuously recorded, while vital signs (e.g., heart rate) and peripheral oxygenation saturation will be concurrently captured with data monitoring software. Arterial and central venous gases will be sampled every 12 hours for the 72h recording period and will include: pH, partial pressure of oxygen, partial pressure of carbon dioxide, and hemoglobin concentration. Participants will be screened daily for delirium with the confusion assessment method (CAM)-ICU, whereas the brief-CAM will be used on the ward. At 3- and 12-months post-ICU discharge, neurological function will be assessed with the Repeatable Battery for the Assessment of Neuropsychological Status and KINARM sensorimotor and cognitive robot-based behavioral tasks.

*Ethics and Dissemination:* The study protocol has been approved in Ontario by a central research ethics board (Clinical Trials Ontario); non-Ontario sites will obtain local ethics approval. The study will be conducted under the guidance of the Canadian Critical Care Trials Group (CCCTG) and the results of this study will be presented at national meetings of the CCCTG for internal

1  
2  
3 72 peer review. Results will also be presented at national/international scientific conferences. Upon  
4  
5 73 completion, the study findings will be submitted for publication in peer-reviewed journals.  
6  
7

8 74 *Trial Registration:* This trial is registered on [clinicaltrials.gov](http://clinicaltrials.gov) (Identifier: [NCT03141619](https://clinicaltrials.gov/ct2/show/study/NCT03141619)),  
9  
10 75 registered May 5, 2017.  
11  
12

13 76 *Key Words:* Near-infrared spectroscopy; Cerebral oximetry; Cerebral autoregulation; KINARM,  
14  
15 77 Delirium; CAM-ICU; Post-intensive care syndrome; RBANS  
16  
17  
18

19 78  
20  
21

22 79  
23  
24

25 80  
26  
27  
28  
29  
30  
31  
32  
33  
34  
35  
36  
37  
38  
39  
40  
41  
42  
43  
44  
45  
46  
47  
48  
49  
50  
51  
52  
53  
54  
55  
56  
57  
58  
59  
60

1  
2  
3 81 **Strengths and Limitations of this study:**  
4  
5

- 6 82 • CONFOCAL2 will further assess the association between poor regional cerebral  
7  
8 83 oxygenation (rSO<sub>2</sub>) and delirium, as well as long-term cognitive outcomes among  
9  
10 84 survivors.  
11  
12  
13 85 • Although this study is observational in nature, which limits causal inferences, broad  
14  
15 86 inclusion criteria and a representative sample size will increase external validity of our  
16  
17 87 findings.  
18  
19  
20 88 • CONFOCAL2 closely resembles routine clinical practice with only minor  
21  
22 89 methodological differences (e.g., rSO<sub>2</sub> monitoring) and results will have the potential to  
23  
24 90 directly translate into clinical practice.  
25  
26

27 91  
28  
29  
30  
31  
32  
33  
34  
35  
36  
37  
38  
39  
40  
41  
42  
43  
44  
45  
46  
47  
48  
49  
50  
51  
52  
53  
54  
55  
56  
57  
58  
59  
60

1  
2  
3 **93 Introduction:**  
4  
5

6 94 Medical advancements in the intensive care unit (ICU) has led to a substantial reduction in  
7  
8 95 mortality rates.<sup>1,2</sup> However, survivors frequently experience post-intensive care syndrome  
9  
10 96 (PICS), which is characterized by cognitive, psychiatric, and physical impairments.<sup>3</sup> These  
11  
12 97 complications have profound effects, including long-term cognitive impairments affecting  
13  
14 98 between 25-75% of survivors,<sup>3</sup> and an approximately 50% decrease in full-time employment.<sup>4</sup>  
15  
16 99 Therefore, modern critical care research should improve our understanding of, and the  
17  
18 100 prevention of, long-term impairments in the growing number of ICU survivors.  
19  
20  
21  
22

23 101 A recent systematic review identified prolonged delirium as the most consistent and potentially  
24  
25 102 modifiable risk factor for long-term cognitive impairment.<sup>5</sup> Patients with delirium experience  
26  
27 103 persistent deficits in various domains, including: memory, executive function, verbal fluency,  
28  
29 104 and attention.<sup>6-8</sup> Furthermore, robotic technology known as the KINARM, which uses the  
30  
31 105 participant's upper limbs to assess sensorimotor and cognitive function, has indicated that ICU  
32  
33 106 survivors also develop visuospatial and motor deficits.<sup>9</sup> Importantly, when assessed using the  
34  
35 107 Repeatable Battery for Neuropsychological Status (RBANS), many critical illness survivors had  
36  
37 108 performance scores similar to patients with moderate traumatic brain injury or mild Alzheimer's  
38  
39 109 disease, with a duration-dependent effect of delirium on impairments in global cognition and  
40  
41 110 executive function.<sup>6</sup>  
42  
43  
44  
45

46 111 Delirium is characterized by reduced awareness, emotional disturbances, restlessness, and  
47  
48 112 incoherence with a 60-87% ICU incidence rate.<sup>10</sup> While risk factors associated with delirium  
49  
50 113 include mechanical ventilation, age, and frailty,<sup>10</sup> the underlying etiology of delirium is poorly  
51  
52 114 understood. Cerebral ischemia is thought to play a central role in delirium development;  
53  
54  
55  
56  
57  
58  
59  
60

1  
2  
3 115 however, understanding this relationship presents several challenges due to the difficulty of  
4  
5 116 continuously measuring cerebral perfusion in the ICU.  
6  
7

8 117 This issue has resulted in a limited number of studies investigating the influence of cerebral  
9  
10 118 perfusion on delirium in critically ill patients (Reviewed in<sup>11</sup>). Near-infrared spectroscopy  
11  
12 119 (NIRS) is a non-invasive technology that measures regional cerebral oxygenation (rSO<sub>2</sub>) as a  
13  
14 120 surrogate marker of cerebral perfusion,<sup>12,13</sup> as rSO<sub>2</sub> values correlate with other markers of  
15  
16 121 cerebral perfusion, including CT perfusion, jugular venous bulb oxygen saturation, and brain  
17  
18 122 tissue oxygen tension.<sup>12-14</sup> Therefore, NIRS is an ideal candidate for both ICU research and  
19  
20 123 clinical practice.  
21  
22  
23  
24

25 124 Feasibility and single-center prospective ICU studies have been performed with NIRS,  
26  
27 125 discovering that low rSO<sub>2</sub> is an independent risk factor for the development of delirium.<sup>15,16</sup> A  
28  
29 126 nested cohort in this study demonstrated that impaired cerebral auto-regulation (i.e., the ability to  
30  
31 127 maintain stabilized and adequate cerebral perfusion) is also associated with the development and  
32  
33 128 duration of delirium.<sup>17,18</sup> While these findings were statistically significant, a multi-centre  
34  
35 129 observational study is necessary for external validation and the study of long-term outcomes.  
36  
37  
38  
39

40 130 Our overarching hypothesis is that decreased rSO<sub>2</sub> in the early stages of critical illness leads to  
41  
42 131 the development of delirium, as well as long-term cognitive impairment among survivors. The  
43  
44 132 primary objective is to further establish an association between poor cerebral perfusion and  
45  
46 133 delirium severity. Secondary objectives include assessing the hemodynamic and physiological  
47  
48 134 determinants of rSO<sub>2</sub>, as well as to identify potential risk factors (e.g., poor rSO<sub>2</sub>) associated with  
49  
50 135 delirium and long-term cognitive deficits. Overall, elucidating the mechanisms of acute and  
51  
52 136 chronic neurological impairment will allow for the development of preventative treatments to  
53  
54  
55 137 improve outcomes among ICU survivors.  
56  
57  
58  
59  
60

1  
2  
3 **138 Methods and Analysis:**  
4  
5

6 *139 Patient and Public Involvement:* At Kingston Health Sciences Centre (KHSC), our staff includes  
7  
8 *140* a patient experience advisor who is a critical care nurse that has been previously admitted with  
9  
10 *141* respiratory failure and shock. This experience as a front-line health care professional, as well as  
11  
12 *142* an ICU patient, will be invaluable to both patient and public involvement. In addition to the  
13  
14 *143* scientific community, patients and their families will also be central to the dissemination of our  
15  
16 *144* findings. Participants that selected to be informed of the results will be mailed/e-mailed the  
17  
18 *145* published findings upon study completion.  
19  
20  
21  
22

23 *146 Study locations and participants:* An overall visual schematic of the study design is shown in  
24  
25 *147* Figure 1. This prospective observational study will take place at 5 sites within Ontario, Canada.  
26  
27 *148* KHSC will serve as the coordinating centre, as the ICU has a history of coordinating academic  
28  
29 *149* and industry funded studies and the staff are familiar with the CONFOCAL protocol, as the pilot  
30  
31 *150* study<sup>16</sup> was conducted at this site. Patients are considered eligible if they are  $\geq 18$  years old, have  
32  
33 *151* been admitted to the ICU  $> 24$  hours and have respiratory failure requiring invasive mechanical  
34  
35 *152* ventilation with an expected duration  $> 24$  hours, and/or have shock of any etiology. Shock will  
36  
37 *153* be defined by the need for one of the following vasopressors/inotropes: Dopamine  $\geq 7.5$   
38  
39 *154* mcg/kg/min, Dobutamine  $\geq 5$  mcg/kg/min, Norepinephrine  $\geq 5$  mcg/min, Phenylephrine  $\geq 75$   
40  
41 *155* mcg/min, Epinephrine at any dose, Milrinone at any dose (if used in conjunction with another  
42  
43 *156* agent), Vasopressin  $\geq 0.03$  u/min (if used in conjunction with another agent), which is adapted  
44  
45 *157* from the BRAIN-ICU inclusion criteria.<sup>6</sup> The exclusion criteria are admission to the ICU  $> 24$   
46  
47 *158* hours, a life expectancy  $< 24$  hours, a primary central nervous system admitting diagnosis (e.g.,  
48  
49 *159* traumatic brain injury, stroke, subarachnoid haemorrhage), and/or any reason that the subject  
50  
51 *160* may not be able to participate in the follow up assessments (e.g., limb amputation, paresis,  
52  
53  
54  
55  
56  
57  
58  
59  
60

1  
2  
3 161 neuromuscular disorders). Post-cardiac arrest patients are also excluded from this study.  
4  
5 162 Additional study sites will include the following: London Health Sciences Centre-Victoria  
6  
7  
8 163 Hospital (London, ON; Site PI Dr. Ian Ball, with co-PIs Dr. Marat Slesserev and Dr. Niamh  
9  
10 164 O'Reagan), Ottawa General Hospital (Site PI Dr. Shane English), and Ottawa Civic Hospital  
11  
12 165 (Site PI Dr. Shane English). KHSC is responsible for developing and maintaining the electronic  
13  
14  
15 166 case report forms (eCRF), data management, and analysis.  
16  
17  
18

19 168 *Potential non-Ontario site expansion:* We are anticipating an enrolment rate of 1-2 patients per  
20  
21 169 site/month. Should our enrolment rates be slower than anticipated, additional sites have already  
22  
23  
24 170 agreed to participate in this study, including: Toronto Western Hospital (Site PI Dr. Victoria  
25  
26 171 McCredie, Université de Montreal (Montreal, QC; Site PI Dr. Michael Chasse) and Vancouver  
27  
28 172 General Hospital (Site PI Dr. Donald Griesdale). Local Ethics approval would be sought prior to  
29  
30  
31 173 enrolment in this study.  
32

33 174  
34  
35 175 *Recruitment and consent:* The Queen's University and Affiliated Hospitals Health Sciences  
36  
37 176 Research Ethics Board will serve as the board of record for the streamlined research ethics  
38  
39  
40 177 review system (Clinical Trials Ontario) and all Ontario sites have gained approval; Non-Ontario  
41  
42 178 sites will need to obtain local ethics approval at their earliest convenience. All patients admitted  
43  
44  
45 179 to the ICU will be screened daily for eligibility. The participant will be approached by a member  
46  
47 180 of the research staff. If the participant is unable to provide consent, the research staff will  
48  
49 181 approach the Substitute Decision Maker (SDM). The research coordinator or trained study staff  
50  
51 182 will obtain informed consent and documentation of the consent process will be noted in the  
52  
53  
54 183 patient's medical chart. As patients meeting eligibility criteria are unlikely to be able to give  
55  
56  
57  
58  
59  
60

1  
2  
3 184 informed consent at the time of enrolment due to their critical condition, we will employ a  
4  
5 185 deferred consent model when appropriate (e.g., SDMs are frequently in an emotional state and  
6  
7 186 may not be available to be contacted), which has already been granted local research ethics board  
8  
9 187 approval. When an SDM is not available to approach, we will enrol the patient and begin trial  
10  
11 188 procedures until the SDM is available for a consent encounter, targeted to be within 72 hours of  
12  
13 189 enrolment. However, we will encourage an *a priori* informed consent whenever possible. The  
14  
15 190 SDM response will be used to continue all trial procedures or any further data collection. If the  
16  
17 191 patient or substitute decision maker declines enrolment, then the patient will be excluded, and all  
18  
19 192 data obtained using deferred consent will be confidentially destroyed. In addition, once the  
20  
21 193 patient has regained capacity according to the medical team, the patient will be approached to  
22  
23 194 affirm or withdraw consent. Each site will be provided with patient identification numbers,  
24  
25 195 which will be assigned sequentially when a patient is enrolled and will be used in all study  
26  
27 196 documentation to ensure patient confidentiality and anonymity. All eligible patients will be  
28  
29 197 recorded on a screening log, which will include their study ID, date of consent, or reason the  
30  
31 198 patient could not be enrolled. The de-identified screening log will be forwarded to the lead  
32  
33 199 project coordinator on a monthly basis. The individual site research coordinators and  
34  
35 200 investigators will be responsible for ensuring the ethical conduct of this trial, screening patients,  
36  
37 201 obtaining consent, and training of staff as needed. The principal investigators and co-  
38  
39 202 investigators will review monthly compliance with the study protocol and recruitment rates.

40 203 *Confidentiality:* To ensure patient confidentiality, identifying information will not be collected  
41  
42 204 on the Case Report Form. Patients will be identified to the coordinating centre only by their  
43  
44 205 unique study identification number. The site study coordinator will maintain a participant master  
45  
46 206 list including the participant name and linked study ID. At the end of the study, this master list



1  
2  
3 207 will be destroyed. In accordance with current requirements, we will store the de-identified data  
4  
5 208 for a minimum of 10 years.  
6  
7

8 **209 Data Collection:**  
9

10  
11 210 *rSO<sub>2</sub>, hemodynamics, medications, and clinical characteristics:* Patients will be enrolled within  
12  
13 211 the first 24 hours of their ICU admission. Immediately following enrolment, the patient will  
14  
15 212 undergo rSO<sub>2</sub> monitoring. A sensor will be placed in the centre of the patient's forehead, which  
16  
17 213 is attached to the FORESIGHT ELITE oximeter (CASMED, Caster Medical, Canada). This  
18  
19 214 device will provide continuous quantification of rSO<sub>2</sub>, every 2 seconds, for 72 hours. To assess  
20  
21 215 the association between hemodynamics and rSO<sub>2</sub> recordings, we will use a commercially  
22  
23 216 available system (Bedmaster, Excel Medical Electronics, FL, USA; or site equivalent) to capture  
24  
25 217 the following vital signs from enrolled patients: heart rate (HR), systolic blood pressure (SBP),  
26  
27 218 diastolic blood pressure (DBP), mean arterial pressure (MAP), and peripheral oxygen saturation  
28  
29 219 (SpO<sub>2</sub>). These data are captured locally and uploaded to the eCRF (REDCap). Throughout this  
30  
31 220 72-hour period of recording, we will document administered continuous infusion and intermittent  
32  
33 221 bolus doses of vasoactive and sedative/analgesic medications, which will be converted to either  
34  
35 222 "fentanyl equivalents" for narcotics, or "midazolam equivalents" for benzodiazepine  
36  
37 223 medications. These conversion formulas have been previously described.<sup>19</sup> Severity of illness  
38  
39 224 will be measured during the first 24 hours of ICU admission using the Acute Physiology and  
40  
41 225 Chronic Health Evaluation II score (APACHE II). Trained research staff will approach  
42  
43 226 whomever provided informed consent (i.e., either the patient or the SDM) to ascertain the  
44  
45 227 enrolled patient's pre-existing frailty (i.e., prior to ICU admission) using the clinical frailty  
46  
47 228 scale,<sup>20</sup> which is 9-point scale (e.g., 1 = very fit to 9 = terminally ill). All clinical data will be  
48  
49 229 captured on the eCRF.  
50  
51  
52  
53  
54  
55  
56  
57  
58  
59  
60

1  
2  
3 230 *Central venous and arterial blood collection:* Both arterial and central venous gases will be  
4  
5 231 sampled every 12 hours during the 72h period of rSO<sub>2</sub> recording and will include: pH, partial  
6  
7 232 pressure of oxygen (pO<sub>2</sub>), partial pressure of carbon dioxide (pCO<sub>2</sub>), and hemoglobin  
8  
9 233 concentration (Hb). These blood samples will be collected only if a central line (PICC, internal  
10  
11 234 jugular, subclavian) and arterial line are *already* in place.

12  
13  
14  
15 235 *Delirium screening:* Patients will be assessed once daily for delirium throughout their entire  
16  
17 236 hospital stay (ICU and ward; up to day 30) using validated screening tools; the Confusion  
18  
19 237 Assessment Method (CAM)-ICU<sup>21</sup>, as well as the brief Confusion Assessment Method  
20  
21 238 (bCAM)<sup>22</sup> which will be administered on the ward. Both delirium screening tools will be  
22  
23 239 administered by trained research staff at a time that is convenient for the patient, their family,  
24  
25 240 and the medical team directing their care.

26  
27  
28  
29  
30 241 From the CAM-ICU, the CAM-ICU 7 (i.e., 7-point delirium severity scale) will also be  
31  
32 242 documented (i.e., 0-2: no delirium, 3-5: mild to moderate delirium, and 6-7: severe delirium).<sup>23</sup>  
33  
34 243 The ICU discharge day will be considered to be the day that the attending writes orders to  
35  
36 244 discharge, in order to avoid the influence of delayed discharge.

37  
38  
39  
40 245 *Determination of pre-existing cognitive impairment:* Our pilot study<sup>16</sup> excluded 10% of patients  
41  
42 246 with a documented history of cognitive impairment in their medical chart, which may limit  
43  
44 247 external validity. Importantly, individuals may have substantial cognitive impairment prior to  
45  
46 248 enrolment but did not receive any formal diagnosis. To address this potential confound, all  
47  
48 249 patients will be assessed, upon enrolment, using the clinical dementia rating (CDR) scale.<sup>24</sup> The  
49  
50 250 CDR is a scale from 0 (Normal) to 3 (severe dementia) that is calculated from a standardized  
51  
52 251 scoring sheet completed by interviewing a patient or their caregiver. All staff completing the  
53  
54  
55  
56  
57  
58  
59  
60

1  
2  
3 252 interview and scoring sheet will undergo rigorous online training and pass a certification exam.  
4

5 253 A diagnosis of pre-existing cognitive impairment will be defined as a CDR >1.  
6  
7

8 254  
9

10  
11 **3- and 12-Month Follow Up:**  
12

13  
14 256 *Neuropsychological assessment: Repeatable Battery for the Assessment of Neuropsychological*  
15

16  
17 257 *Status (RBANS):* Participants will complete a 3- and 12-month follow up assessment in which  
18

19 258 the RBANS will be administered by a trained researcher. The RBANS assesses global cognition,  
20

21 259 as well as several subdomains (i.e., immediate and delayed memory, visuospatial/constructional,  
22

23 260 language, and attention). These indices have been described previously,<sup>25</sup> and survivors will be  
24

25 261 compared to age-matched controls. To improve follow up rates, in home/hospital testing will be  
26

27 262 performed for individuals not able to return for laboratory assessment. Participant scores are  
28

29 263 converted to standardized values in which the normative range will be considered a mean of  
30

31 264 100+/-24.75 (1.65 SD). Participants that score >75 will not be considered impaired, as these  
32

33 265 subjects are performing within or above the normative range. The RBANS assessment requires  
34

35 266 ~20-30 minutes to complete.  
36  
37  
38  
39

40 267 *KINARM Assessment:* Participants (from the Kingston region only) will complete a 3- and 12-  
41

42 268 month follow up assessment using the End-Point bimanual KINARM robot (BKIN  
43

44 269 Technologies, Kingston). With each hand, the seated subject grasps a handle attached to a planar  
45

46 270 robotic device that permits movements in the horizontal plane with an integrated virtual reality  
47

48 271 system that presents objects in the horizontal plane (Figure 2). Subjects will perform a  
49

50 272 behavioural battery to quantify a broad range of sensorimotor, and cognitive function using their  
51

52 273 upper limbs. A trained operator selects a task from the software menu, reads the standardized  
53  
54  
55  
56  
57  
58  
59  
60

1  
2  
3 274 instructions, and then monitors performance in real-time. We will administer 8 tasks from the  
4  
5 275 KINARM Standard Tests™ including: Object Hit (OH),<sup>26</sup> Object Hit and Avoid (OHA),<sup>27</sup> Ball  
6  
7  
8 276 on Bar (BonB),<sup>28</sup> Visually Guided Reaching (VGR),<sup>29</sup> Reverse Visually Guided Reaching  
9  
10 277 (RVGR),<sup>30</sup> Spatial Span (SS), Trail Making A and B, and Arm Position Matching (APM),<sup>31</sup>.  
11  
12 278 Each task has been previously described,<sup>32</sup>and quantifies subject performance using  
13  
14 279 approximately 6 to 12 metrics per task. Each metric is converted into normalized units based on  
15  
16 280 healthy subject performance, considering the influence of sex, age, and handedness (0 is mean  
17  
18 281 performance and  $\pm 1$  is a standard deviation from the mean). For each task, a task score will also  
19  
20 282 be generated to provide a global performance measure with values that are equivalent to standard  
21  
22 283 deviation units with zero specifying best possible performance, and higher values indicating  
23  
24 284 worse performance. Therefore, performance will be considered abnormal if the task score is  
25  
26 285 outside the +1.96 range (i.e., 5th percentile). The task score has been previously described.<sup>33</sup> The  
27  
28  
29  
30  
31 286 KINARM assessment takes ~45 minutes to complete.

32  
33  
34 287

### 35 36 37 288 **Statistical Plan:**

38  
39 289 *Quantification of disturbed cerebral autoregulation:* Cerebral autoregulation will be evaluated  
40  
41 290 by computing customized algorithms (MATLAB, MathWorks, MA, USA) of the time-varying  
42  
43 291 Spearman correlation coefficients between rSO<sub>2</sub> and MAP (i.e., cerebral autoregulation index,  
44  
45 292 COx) with a moving time window advanced in 1 min steps over the 72-hour period of recording.  
46  
47 293 This cerebral autoregulation assessment has been previously described<sup>18</sup> and a visual  
48  
49 294 representation can be observed in Figure 3. In addition, we will perform the COx across varying  
50  
51 295 window lengths to further assess the optimal window length of recording (e.g., 5, 10, 30, 60, 120,  
52  
53 296 240, 300-minute windows). Positive COx values (i.e., MAP and rSO<sub>2</sub> move in the same  
54  
55  
56  
57  
58  
59  
60

1  
2  
3 297 direction) reflect dysfunctional cerebral autoregulation, whereas negative (i.e., MAP and rSO<sub>2</sub>  
4  
5 298 move in the opposite direction) and near zero (< 0.3) indicate intact cerebral autoregulation.  
6  
7  
8 299 However, we will define cerebral autoregulation dysfunction by using a statistical significance  
9  
10 300 threshold for positive COx correlation values (p<0.0001). Cumulative duration of disturbed  
11  
12 301 autoregulation will be given by the duration of time spent with a significant positive correlation  
13  
14 302 throughout the period of neuromonitoring. Computer algorithms for COx will be developed and  
15  
16 303 implemented blind to the neurological status of enrolled patients.  
17  
18  
19

20 304 *Estimating optimal MAP:* To calculate the individualized optimal MAP (MAP<sub>OPT</sub>), the computed  
21  
22 305 COx values will be binned by the average MAP value in their respective moving windows in 5  
23  
24 306 mmHg bins.<sup>34</sup> An alternative strategy will also be implemented. We will invert the MAP<sub>OPT</sub>  
25  
26 307 binning procedure by binning MAP values by their corresponding COx values in sequential 0.05  
27  
28 308 bins of Spearman correlation coefficients ranging from -1 to +1. This procedure has been  
29  
30 309 previously described.<sup>18</sup>  
31  
32  
33

34 310 *Assessment of primary outcome:* Multivariate linear regression will be used to characterize the  
35  
36 311 association between adequate cerebral perfusion (as measured using duration of time (minutes)  
37  
38 312 outside of MAP<sub>OPT</sub>, mean rSO<sub>2</sub>, and duration of disturbed cerebral autoregulation) and delirium  
39  
40 313 severity throughout a patient's ICU stay to determine if poor cerebral oxygenation is an  
41  
42 314 independent predictor of delirium. We will estimate the unadjusted effect of each individual  
43  
44 315 predictor on delirium severity (i.e., cumulative CAM-7 scores per patient). The simultaneous  
45  
46 316 multivariate regression model will adjust for the following covariates due to their potential  
47  
48 317 associations with delirium: a history of hypertension, a history of alcohol abuse, total sedative  
49  
50 318 dose (in midazolam equivalents), total narcotic dose (in fentanyl equivalents), severity of illness  
51  
52 319 (APACHE II scores), pre-existing cognitive impairment (CDR score), length of ICU stay, frailty,  
53  
54  
55  
56  
57  
58  
59  
60

1  
2  
3 320 (clinical frailty scale) and blood urea nitrogen. The multivariable model will provide the adjusted  
4  
5 321 regression coefficients after controlling for all predictors included in the model. All covariates  
6  
7 322 included in regression modeling have been chosen *a priori* based on clinical judgment and  
8  
9  
10 323 previous research.<sup>16,35</sup> Model diagnostics will be conducted to assess the underlying assumptions  
11  
12 324 of linear regression (i.e., linearity, normally distributed residuals, equal variances, and lack of  
13  
14 325 multicollinearity) for all models. Multiple imputation strategies will be applied at the time of the  
15  
16 326 regression modeling to account for any missing data and reduce bias associated with excluding  
17  
18  
19 327 patients due to partially collected data.  
20  
21

22 328 *Secondary outcomes:*  
23  
24

25 329 *Determinants of rSO<sub>2</sub>:* To assess the hemodynamic and physiological determinants of rSO<sub>2</sub> at the  
26  
27 330 patient level, multiple linear regression will be performed using the patient average of each  
28  
29 331 variable over the 72-hour data collection period. The following predictors will be included in the  
30  
31 332 regression model: HR, SpO<sub>2</sub>, MAP, arterial, and venous blood gas data (i.e., pH, pO<sub>2</sub>, and  
32  
33 333 pCO<sub>2</sub>), central venous oxygen saturation, and Hb concentration. In addition, the multivariate  
34  
35 334 model will control for the following covariates associated with cerebral perfusion: age,<sup>36</sup> as well  
36  
37 335 as total sedative, narcotic, and vasopressor dosing. Simultaneous multiple linear regression with  
38  
39 336 adjustment for all aforementioned covariates will be implemented. As stated for the primary  
40  
41 337 outcome regression analysis, model diagnostics will be performed. Furthermore, the relationship  
42  
43 338 between the determinants of the NIRS-derived rSO<sub>2</sub> signal may vary over time (see Figure 4 and  
44  
45 339 Supplemental Movie 1). Therefore, a repeated measures analysis will also be performed by using  
46  
47 340 multilevel modeling with 6 observations reflecting each 12-hour period during the 72-hour data  
48  
49 341 collection period (with time coded as 0 – 5, so the intercept equals baseline/time of enrolment)  
50  
51 342 nested within each subject. The predictors will be the same as the regression model but allowed  
52  
53  
54  
55  
56  
57  
58  
59  
60

1  
2  
3 343 to be time varying across the 6 observation points. This analysis will assess if within patient  
4  
5 344 changes in the predictors correlate with changes in rSO<sub>2</sub>, and if these associations are modified  
6  
7  
8 345 by fixed patient characteristics, such as age.  
9

10 346 *Assessing if poor cerebral perfusion during critical illness is a significant predictor of long-term*  
11  
12  
13 347 *neurological dysfunction among ICU survivors:* Multiple linear regression analysis will be used  
14  
15 348 to assess if impaired cerebral perfusion (i.e., time below MAP<sub>OPT</sub>, mean rSO<sub>2</sub>, and duration of  
16  
17 349 disturbed cerebral autoregulation) is associated with RBANS global cognition scores at 3- and  
18  
19  
20 350 12-months post-ICU discharge. We will use the following clinical covariates collected on  
21  
22 351 admission (i.e., pre-existing cognitive impairment, age, severity of illness, frailty) and data  
23  
24 352 collected within the first 72 hours of the patients' ICU stay (i.e., narcotic dosing and  
25  
26 353 benzodiazepine dosing). All covariates will be adjusted for in separate regression models for the  
27  
28 354 cognitive outcomes at 3- and 12-months post-ICU discharge. If global cognition is significantly  
29  
30 355 predicted by the time below MAP<sub>OPT</sub>, we will conduct an exploratory analysis of the RBANS  
31  
32 356 subdomains of cognition (i.e., delay and immediate memory, language, attention,  
33  
34 357 visuospatial/constructional) adjusting for the aforementioned covariates to further explore  
35  
36 358 specific areas of impairment observed among survivors of critical illness. Due to the limited  
37  
38 359 availability of the KINARM robot across sites, only patients assessed at KHSC will undergo  
39  
40 360 KINARM testing. This data will be assessed with descriptive statistics only to avoid any potential  
41  
42  
43 361 bias introduced by this design.  
44  
45  
46  
47

#### 48 362 **Sample Size Calculation:**

49  
50

51 363 *Primary Outcome:* Our overall hypothesis is that poor cerebral perfusion contributes to delirium  
52  
53 364 and long-term cognitive impairment. For study purposes, we define poor cerebral perfusion as  
54  
55 365 the composite of 1) low mean rSO<sub>2</sub>, 2) duration of impaired cerebral autoregulation, and 3) time  
56  
57  
58  
59  
60



1  
2  
3 366 outside individualized optimal MAP ( $MAP_{OPT}$ ), which will be discussed in more detail in the  
4  
5 367 statistical plan section. We acknowledge that this is an imperfect measure of cerebral perfusion.  
6  
7 368 However, this is a comprehensive, continuous, and non-invasive assessment of cerebral  
8  
9 369 perfusion. For our primary outcome (CAM-7 delirium severity score), we will enrol a total of  
10  
11 370 500 patients, as our prior work has demonstrated that ~20% of patients remain comatose (RASS  
12  
13 371 = -4 or -5) during their entire ICU stay<sup>16</sup>, and cannot be assessed for delirium. Therefore, using  
14  
15 372 our pilot data, we estimate that ~100 patients will remain comatose resulting in approximately  
16  
17 373 400 patients to assess our primary outcome, which will allow for 10 degrees of freedom for our 3  
18  
19 374 measures of perfusion (i.e., mean  $rSO_2$ , duration of disturbed cerebral autoregulation, duration  
20  
21 375 outside  $MAP_{OPT}$ ) and controlling for the 9 covariates (see below). The 10 degrees of freedom  
22  
23 376 will allow us to model non-linear relationships between the 3 measures of cerebral perfusion and  
24  
25 377 delirium severity. This sample size achieves 90% power to detect an  $R^2$  of 0.050 collectively  
26  
27 378 among these measures of cerebral perfusion and using an F-test with a significance level ( $\alpha$ )  
28  
29 379 of 0.050 (see Figure 5).  
30  
31  
32  
33  
34  
35

### 36 380 *Secondary Outcomes-Physiological determinants of $rSO_2$ and neurological outcomes*

37  
38  
39 381 For evaluating the determinants of the  $rSO_2$  signal during critical illness, we will assess the  
40  
41 382 association between each of the 9 pre-specified candidate predictors of  $rSO_2$  after controlling for  
42  
43 383 the 4 co-variates (see below for co-variates). We will use a Bonferroni correction  
44  
45 384 ( $0.05/9=0.0056$ ) to control for multiple testing. With the total 500 patients recruited, and a  
46  
47 385 multivariate regression model that includes 13 independent variables, this testing strategy will  
48  
49 386 provide 90% power to identify any predictor that explains an additional 3.2% of the variance of  
50  
51 387  $rSO_2$  after controlling for the other variables in the model. This sample size is sufficient to  
52  
53 388 identify independent significant predictors that account for a small-moderate degree of variance  
54  
55  
56  
57  
58  
59  
60



1  
2  
3 389 in the overall rSO<sub>2</sub> signal. However, our pilot data indicated a 30% mortality rate. Given our  
4  
5 390 overall sample size of 500 patients recruited, we are anticipating ~350 ICU survivors (i.e., 500-  
6  
7 391 150) to return for follow up assessment. This cohort will provide sufficient power to detect  
8  
9 392 important predictors of long-term neurological outcomes. However, these predictors have been  
10  
11 393 intentionally not specified *a priori*, as this analysis will be dependent on our findings related to  
12  
13 394 cerebral perfusion and delirium.  
14  
15

16  
17 395 All sample size calculations were conducted using Power Analysis and Sample Size Software  
18  
19 396 (Version 15).<sup>37</sup>  
20  
21  
22

23 397

24  
25 398 The actual start date at KHSC began on January 26, 2018 and our estimated primary completion  
26  
27 399 data is June 2022. Due to our 12 month follow up, we expect the study to be completed June  
28  
29 400 2023.  
30  
31

32  
33 401  
34  
35  
36  
37  
38  
39  
40  
41  
42  
43  
44  
45  
46  
47  
48  
49  
50  
51  
52  
53  
54  
55  
56  
57  
58  
59  
60

1  
2  
3 402 **DISCUSSION**  
4  
5

6 403 This multicentre observational study will extend our preliminary findings of reduced rSO<sub>2</sub> as an  
7  
8 404 independent risk factor for the development of delirium during critical illness. With the proposed  
9  
10 405 larger sample size, we will not only be able to replicate and validate this completely novel  
11  
12 406 finding, but we will also be able to further characterize the physiological determinants of rSO<sub>2</sub> in  
13  
14 407 a representative cohort. Furthermore, this study will have the potential to identify novel  
15  
16 408 pathophysiological mechanism associated with the development of delirium and long-term  
17  
18 409 neurological dysfunction among ICU survivors. These findings will inform the next phase of this  
19  
20 410 research program: a proof-of-principal study, aimed at devising strategies to optimize rSO<sub>2</sub>. It  
21  
22 411 will lay the foundation for a larger interventional study designed to assess whether optimization  
23  
24 412 of rSO<sub>2</sub> can reduce delirium and improve long-term neurological outcomes for patients.  
25  
26  
27  
28  
29

30 413  
31  
32

33 414  
34  
35  
36  
37  
38  
39  
40  
41  
42  
43  
44  
45  
46  
47  
48  
49  
50  
51  
52  
53  
54  
55  
56  
57  
58  
59  
60

1  
2  
3 415 **Ethics and Dissemination:**  
4  
5

6 416 *Risks/Ethical Considerations:* Ethics approval will be obtained prior to the commencement of  
7  
8 417 screening and enrolment at each site. There are no assumed risks associated with the proposed  
9  
10 418 assessment procedures, as this study only involves a small amount of bloodwork, which will only  
11  
12 419 be collected if a central line and arterial line are *already* in place. Furthermore, results from our  
13  
14 420 pilot study demonstrated that non-invasive monitoring of cerebral oxygenation, while using a  
15  
16 421 deferred consent model, does not interfere with patient care or management.<sup>15</sup> Research  
17  
18 422 participants and their SDMs will be informed that enrolment in this study will not affect their  
19  
20 423 care in any way, and that they have the right to refuse participation or withdraw at any time.  
21  
22  
23  
24

25 424 *Dissemination of results:* The results of this study will be presented at national meetings of the  
26  
27 425 Canadian Critical Care Trials Group. Prior to submitting any manuscript for publication, it will  
28  
29 426 undergo rigorous internal peer review by this group of critical care experts. Our study group has  
30  
31 427 a long track record of presenting our data at national and international critical care conferences.  
32  
33 428 We anticipate the preliminary results of this research program will also be presented at these  
34  
35 429 conferences (e.g., American Delirium Society). The final study results will be submitted for  
36  
37 430 publication to high impact journals.  
38  
39  
40  
41

42 431

43 432

44 433  
45  
46  
47  
48  
49  
50  
51  
52  
53  
54  
55  
56  
57  
58  
59  
60

434 **References:**

- 435 1. Hutchings, A. *et al.* Evaluation of modernisation of adult critical care services in England:  
436 time series and cost effectiveness analysis. *BMJ* **339**, b4353–b4353 (2009).
- 437 2. Zimmerman, J. E., Kramer, A. A. & Knaus, W. A. Changes in hospital mortality for  
438 United States intensive care unit admissions from 1988 to 2012. *Crit. Care* **17**, R81  
439 (2013).
- 440 3. Rawal, G., Yadav, S. & Kumar, R. Post-intensive care syndrome: An overview. *J. Transl.*  
441 *Intern. Med.* **5**, 90–92 (2017).
- 442 4. Norman, B. C. *et al.* Employment Outcomes After Critical Illness. *Crit. Care Med.*  
443 (2016). doi:10.1097/CCM.0000000000001849
- 444 5. Sakusic, A. *et al.* Potentially Modifiable Risk Factors for Long-Term Cognitive  
445 Impairment After Critical Illness: A Systematic Review. *Mayo Clin. Proc.* **93**, 68–82  
446 (2018).
- 447 6. Pandharipande, P. P. *et al.* Long-Term Cognitive Impairment after Critical Illness. *N.*  
448 *Engl. J. Med.* **369**, 1306–1316 (2013).
- 449 7. Suchyta, M. R., Jephson, A. & Hopkins, R. O. Neurologic Changes during Critical Illness:  
450 Brain Imaging Findings and Neurobehavioral Outcomes. *Brain Imaging Behav.* **4**, 22–34  
451 (2010).
- 452 8. Wolters, A. E., Slooter, A. J. C., van der Kooi, A. W. & Van Dijk, D. Cognitive  
453 impairment after intensive care unit admission: a systematic review. *Intensive Care Med.*  
454 **39**, 376–386 (2013).
- 455 9. Wood, M. D., Maslove, D. M., Muscedere, J., Scott, S. H. & Boyd, J. G. Robotic  
456 technology provides objective and quantifiable metrics of neurocognitive functioning in  
457 survivors of critical illness: A feasibility study. *J. Crit. Care* **48**, 228–236 (2018).
- 458 10. Maldonado, J. R. Acute Brain Failure: Pathophysiology, Diagnosis, Management, and  
459 Sequelae of Delirium. *Crit. Care Clin.* **33**, 461–519 (2017).
- 460 11. Bendahan, N., Neal, O., Ross-White, A., Muscedere, J. & Boyd, J. G. Relationship  
461 Between Near-Infrared Spectroscopy-Derived Cerebral Oxygenation and Delirium in  
462 Critically Ill Patients: A Systematic Review. *J. Intensive Care Med.* 885066618807399  
463 (2018). doi:10.1177/0885066618807399
- 464 12. McLeod, A. D., Igielman, F., Elwell, C., Cope, M. & Smith, M. Measuring cerebral  
465 oxygenation during normobaric hyperoxia: a comparison of tissue microprobes, near-  
466 infrared spectroscopy, and jugular venous oximetry in head injury. *Anesth. Analg.* **97**,  
467 851–6 (2003).
- 468 13. Taussky, P. *et al.* Validation of frontal near-infrared spectroscopy as noninvasive bedside  
469 monitoring for regional cerebral blood flow in brain-injured patients. *Neurosurg. Focus*  
470 **32**, E2 (2012).
- 471 14. Kim, M. B. *et al.* Estimation of jugular venous O<sub>2</sub> saturation from cerebral oximetry or

- 1  
2  
3 472 arterial O<sub>2</sub>saturation during isocapnic hypoxia. *J. Clin. Monit. Comput.* (2000).  
4 473 doi:10.1023/A:1009940031063  
5
- 6 474 15. Wood, M. *et al.* Brain Tissue Oxygenation in Patients with Septic Shock: a Feasibility  
7 475 Study. *Can. J. Neurol. Sci.* **43**, 65–73 (2016).  
8
- 9 476 16. Wood, M. D., Maslove, D. M., Muscedere, J. G., Day, A. G. & Gordon Boyd, J. Low  
10 477 brain tissue oxygenation contributes to the development of delirium in critically ill  
11 478 patients: A prospective observational study. *J. Crit. Care* **41**, 289–295 (2017).  
12
- 13 479 17. Pfister, D. *et al.* Cerebral perfusion in sepsis-associated delirium. *Crit. Care* **12**, R63  
14 480 (2008).  
15
- 16 481 18. Lee, K. F., Wood, M. D., Maslove, D. M., Muscedere, J. G. & Boyd, J. G. Dysfunctional  
17 482 cerebral autoregulation is associated with delirium in critically ill adults. *J. Cereb. Blood*  
18 483 *Flow Metab.* 0271678X1880308 (2018). doi:10.1177/0271678X18803081  
19
- 20 484 19. Mehta, S. *et al.* Prevalence, Risk Factors, and Outcomes of Delirium in Mechanically  
21 485 Ventilated Adults. *Crit. Care Med.* **43**, 557–66 (2014).  
22
- 23 486 20. Rockwood, K. *et al.* A global clinical measure of fitness and frailty in elderly people. *Can.*  
24 487 *Med. Assoc. J.* **173**, 489–495 (2005).  
25
- 26 488 21. Ely, E. W. *et al.* Evaluation of delirium in critically ill patients: validation of the  
27 489 Confusion Assessment Method for the Intensive Care Unit (CAM-ICU). *Crit. Care Med.*  
28 490 **29**, 1370–1379 (2001).  
29
- 30 491 22. Han, J. H. *et al.* Diagnosing delirium in older emergency department patients: validity and  
31 492 reliability of the delirium triage screen and the brief confusion assessment method. *Ann.*  
32 493 *Emerg. Med.* **62**, 457–465 (2013).  
33
- 34 494 23. Khan, B. A. *et al.* The Confusion Assessment Method for the ICU-7 Delirium Severity  
35 495 Scale: A Novel Delirium Severity Instrument for Use in the ICU. *Crit. Care Med.* **45**,  
36 496 851–857 (2017).  
37
- 38 497 24. Hughes, C. P., Berg, L., Danziger, W. L., Coben, L. A. & Martin, R. L. A new clinical  
39 498 scale for the staging of dementia. *Br. J. Psychiatry* **140**, 566–72 (1982).  
40
- 41 499 25. Randolph, C., Tierney, M. C., Mohr, E. & Chase, T. N. The Repeatable Battery for the  
42 500 Assessment of Neuropsychological Status (RBANS): preliminary clinical validity. *J. Clin.*  
43 501 *Exp. Neuropsychol.* **20**, 310–9 (1998).  
44
- 45 502 26. Tyryshkin, K. *et al.* A robotic object hitting task to quantify sensorimotor impairments in  
46 503 participants with stroke. *J. Neuroeng. Rehabil.* **11**, 47 (2014).  
47
- 48 504 27. Bourke, T. C. *et al.* A robot-based behavioural task to quantify impairments in rapid motor  
49 505 decisions and actions after stroke. *J. Neuroeng. Rehabil.* **13**, 91 (2016).  
50
- 51 506 28. Lowrey, C. R., Jackson, C. PT., Bagg, S. D., Dukelow, S. P., & Scott, S. H., Lowrey, C. &  
52 507 Jackson, C. A Novel Robotic Task for Assessing Impairments in Bimanual Coordination  
53 508 Post-Stroke. *Int. J. Phys. Med. Rehabil.* **s3**, (2014).  
54
- 55 509 29. Coderre, A. M. *et al.* Assessment of upper-limb sensorimotor function of subacute stroke  
56  
57  
58  
59

- 1  
2  
3 510 patients using visually guided reaching. *Neurorehabil. Neural Repair* **24**, 528–541 (2010).  
4  
5 511 30. Hawkins, K. M. & Sergio, L. E. Visuomotor Impairments in Older Adults at Increased  
6 512 Alzheimer’s Disease Risk. *J. Alzheimers. Dis.* **42**, 607–621 (2014).  
7  
8 513 31. Dukelow, S. P. *et al.* Quantitative assessment of limb position sense following stroke.  
9 514 *Neurorehabil. Neural Repair* **24**, 178–187 (2010).  
10  
11 515 32. Wood, M. D. *et al.* Assessing the relationship between brain tissue oxygenation and  
12 516 neurological dysfunction in critically ill patients : study protocol. *Int J Clin Trials* **3**, 98–  
13 517 105 (2016).  
14  
15 518 33. Simmatis, L., Krett, J., Scott, S. H. & Jin, A. Y. Robotic exoskeleton assessment of  
16 519 transient ischemic attack. *PLoS One* **12**, e0188786 (2017).  
17  
18 520 34. Sekhon, M. S. *et al.* Using the relationship between brain tissue regional saturation of  
19 521 oxygen and mean arterial pressure to determine the optimal mean arterial pressure in  
20 522 patients following cardiac arrest: A pilot proof-of-concept study. *Resuscitation* **106**, 120–  
21 523 125 (2016).  
22  
23 524 35. Wassenaar, A. *et al.* Multinational development and validation of an early prediction  
24 525 model for delirium in ICU patients. *Intensive Care Med.* **41**, 1048–1056 (2015).  
25  
26 526 36. Buijs, P. C. *et al.* Effect of age on cerebral blood flow: measurement with ungated two-  
27 527 dimensional phase-contrast MR angiography in 250 adults. *Radiology* **209**, 667–74  
28 528 (1998).  
29  
30 529 37. PASS 15 Power Analysis and Sample Size Software (2017). NCSS, LLC. Kaysville, Utah,  
31 530 USA, [nccs.com/software/pass](http://nccs.com/software/pass).  
32

33 531  
34  
35  
36  
37  
38  
39  
40  
41  
42  
43  
44  
45  
46  
47  
48  
49  
50  
51  
52  
53  
54  
55  
56  
57  
58  
59

1  
2  
3 **532 Acknowledgments:**  
4

5 533 The authors would like to thank the study coordinators, Ms. Miranda Hunt, Ms. Ilinca  
6 534 Georgescu, and Mrs. Tracy Boyd, as well as the entire KHSC ICU staff for their continued  
7 535 support of our clinical research. This manuscript underwent an internal peer-review process with  
8 536 the Canadian Critical Care Trials Group, and we are greatly appreciative of the helpful  
9 537 contributions made by both Dr. Lisa Burry and Dr. Pierre Cardinal. We would also like to thank  
10 538 the KINARM technologists, Ms. Simone Appaqaq, Ms. Kim Moore, and Ms. Helen Bretzke.  
11  
12

13 539  
14

15 **540 List of Abbreviations**  
16

17 541 APM: Arm Position Matching  
18

19 542 BonB: Ball on Bar  
20

21 543 bCAM: Brief Confusion Assessment Method  
22

23 544 CDR: Clinical Dementia Rating Scale  
24

25 545 COx: Cerebral Oximetry Index  
26

27 546 Hb: Hemoglobin Concentration  
28

29 547 HR: Heart Rate  
30

31 548 KHSC: Kingston Health Sciences Centre  
32

33 549 KINARM: Kinesiological Instrument for Normal and Altered Reaching Movement  
34

35 550 ICU: Intensive Care Unit  
36

37 551 MAP: Mean Arterial Pressure  
38

39 552 MAP<sub>OPT</sub>: Optimal Mean Arterial Pressure  
40

41 553 NIRS: Near-infrared Spectroscopy  
42

43 554 OH: Object Hit  
44

45 555 OHA: Object Hit and Avoid  
46

47 556 pCO<sub>2</sub>: Arterial Partial Pressure of Carbon Dioxide  
48

49 557 PICS: Post-intensive Care Syndrome  
50

51 558 pO<sub>2</sub>: Arterial Partial Pressure of Oxygen  
52

53 559 RASS: Richmond Agitation and Sedation Scale  
54

55 560 RBANS: Repeatable Battery for the Assessment of Neuropsychological Status  
56

57 561 rSO<sub>2</sub>: Regional Cerebral Oxygenation  
58  
59  
60

1  
2  
3 562 RVGR: Reverse Visually Guided Reaching  
4

5 563 SpO<sub>2</sub>: Peripheral Oxygen Saturation  
6

7 564 SS: Spatial Span  
8

9 565 SDM: Substitute Decision Maker  
10

11 566 VGR: Visually Guided Reaching  
12

13 567  
14

15 568 **Authors' contributions:**

16 569 MDW participated in study design, statistical planning, and drafting of the manuscript.  
17

18 570 JK participated in study design and drafting of the manuscript.  
19

20 571 KL participated in study design and drafting of the manuscript.  
21

22 572 DM participated in study design and drafting of the manuscript.  
23

24 573 JM participated in study design and drafting of the manuscript.  
25

26 574 MH participated in study design and drafting of the manuscript.  
27

28 575 SHS participated in study design and drafting of the manuscript.  
29

30 576 AD participated in sample size calculations and finalizing of the statistical plan.  
31

32 577 JAJ participated in statistical planning and drafting of the manuscript.  
33

34 578 IB participated in study design and drafting of the manuscript.  
35

36 579 MS participated in study design and drafting of the manuscript.  
37

38 580 NO participated in study design and drafting of the manuscript.  
39

40 581 SE participated in study design and drafting of the manuscript.  
41

42 582 VM participated in study design and drafting of the manuscript.  
43

44 583 MC participated in study design and drafting of the manuscript.  
45

46 584 DG participated in study design and drafting of the manuscript.  
47

48 585 JGB is the primary investigator. He participated in study design and drafting of the manuscript.  
49

50 586  
51

52 587 **Funding statement:**

53 588 This work was supported by the Physician Services Incorporated and the Southeastern Ontario  
54

55 589 Academic Medical Organization New Clinician Scientist Program for which JGB was the  
56  
57  
58  
59  
60



1  
2  
3 590 recipient. The funding agencies had no role in the design of this study, data collection, or data  
4 591 analysis.

5  
6 592

7  
8 **593 Competing interests statement.**

9  
10 594 Mr. Michael D. Wood has nothing to disclose.

11  
12 595 Ms. Jasmine Khan has nothing to disclose.

13  
14 596 Dr. Kevin Lee has nothing to disclose.

15  
16 597 Dr. David Maslove has nothing to disclose.

17  
18 598 Dr. John Muscedere is the scientific director of the Canadian Frailty Network.

19  
20 599 Ms. Miranda Hunt has nothing to disclose.

21  
22 600 Dr. Stephen Scott is the cofounder of BKIN Technologies, the manufacturer of the KINARM  
23 601 device.

24  
25 602 Mr. Andrew Day has nothing to disclose.

26  
27 603 Dr. Jill Jacobson has nothing to disclose.

28  
29 604 Dr. Ian Ball receives a stipend from the Trillium Gift of Life Network to support his role as a  
30 605 Regional Medical Lead.

31  
32 606 Dr. Niamh O'Regan received funding from the Academic Medical Organization of Southwestern  
33 607 Ontario.

34  
35 608 Dr. Marat Slessarev receives a stipend from the Trillium Gift of Life Network to support his role  
36 609 as a Hospital Donation Physician.

37  
38 610 Dr. Victoria McCredie has nothing to disclose.

39  
40 611 Dr. Shane English has nothing to disclose.

41  
42 612 Dr. Donald Griesdale is funded through a Health-Professional Investigator Award from the  
43 613 Michael Smith Foundation for Health Research.

44  
45 614 Dr. J. Gordon Boyd receives a stipend from the Trillium Gift of Life Network to support his role  
46 615 as a Regional Medical Lead.

47  
48 616  
49  
50  
51  
52  
53  
54  
55  
56  
57  
58  
59  
60

1  
2  
3 617 **Figure Legends:**  
4

5 618 **Figure 1.** A visual representation of the CONFOCAL2 study design from enrolment to 3- and  
6 619 12-month follow up assessments.

8 620 **Figure 2.** Three-dimensional animated representation of the KINARM End-Point robotic set-up  
9 621 used at 3- and 12-month follow up assessments.

11 622 **Figure 3A.** Simplified line graph (24 hours instead of the full 72 hour recording period)  
12 623 illustrating the sliding window correlation between mean arterial pressure and regional cerebral  
13 624 oxygenation for an individual patient over a 24 period of recording. *Note.* The black rectangle  
14 625 represents a 60-minute window that moves forward 1-minute at a time until the recording period  
15 626 is completed. **B.** Scatter plot illustrating a time dependent positive association between mean  
16 627 arterial pressure and regional cerebral oxygenation. *Note.* Black dots represent data collected for  
17 628 an individual patient over 24 hours, with the blue line representing a linear model fit to the data,  
18 629 and the grey shaded region representing the 95% confidence interval. **C.** Scatter plot indicating  
19 630 the time varying association between mean arterial pressure and regional cerebral oxygenation  
20 631 represented as the cerebral oximetry index (COx) over an individual patient's 24-hour recording  
21 632 period. *Note.* Statistically significant ( $p < 0.0001$ ) positive Cox values represent dysfunctional  
22 633 cerebral autoregulation, with negative or near zero values indicating intact cerebral  
23 634 autoregulation.

28 635 **Figure 4.** Line graph of the high frequency vital sign recordings indicates the highly variable  
29 636 relationships with regional cerebral oxygenation over the 72-hour period of recording. *Note.* The  
30 637 figure represents a single patient's ICU recording. rSO<sub>2</sub> = Regional cerebral oxygenation; HR =  
31 638 Heart rate; SpO<sub>2</sub> = Arterial oxygen saturation; artMAP= Mean arterial pressure from an arterial  
32 639 line.

35 640 **Figure 5.** A power curve indicating the study sample size, and the respective statistical power, to  
36 641 assess the primary study outcome. *Note.* Red dots represent the sample size needed for a given  
37 642 statistical power. The primary sample size was calculated using the following multivariate  
38 643 regression model parameters: 10 independent variables tested, controlling for 9 additional  
39 644 covariates, power = 0.90, R<sup>2</sup> = 0.050,  $\alpha$  = 0.05, which would require a sample size of 400.

41  
42 645  
43  
44  
45  
46  
47  
48  
49  
50  
51  
52  
53  
54  
55  
56  
57  
58  
59

1  
2  
3  
4  
5  
6  
7  
8  
9  
10  
11  
12  
13  
14  
15  
16  
17  
18  
19  
20  
21  
22  
23  
24  
25  
26  
27  
28  
29  
30  
31  
32  
33  
34  
35  
36  
37  
38  
39  
40  
41  
42  
43  
44  
45  
46  
47  
48  
49  
50  
51  
52  
53  
54  
55  
56  
57  
58  
59  
60

**Inclusion Criteria**

- >17 years old
- >24hr mechanical ventilation due to respiratory failure and/or shock

**Exclusion Criteria**

- Neurological/neurosurgical admitting diagnosis
- <24hr life expectancy
- Inability to participate in follow-up

Enrolment

**Covariates Collected**

- Pre-existing cognitive dysfunction
- History of hypertension
- History of alcohol abuse
- Severity of Illness (APACHE II)
- Sedative + narcotic dose
- Blood urea nitrogen
- Length of ICU stay



**Blood Samples**

- pH
- pO2
- pCO2
- Hb conc.

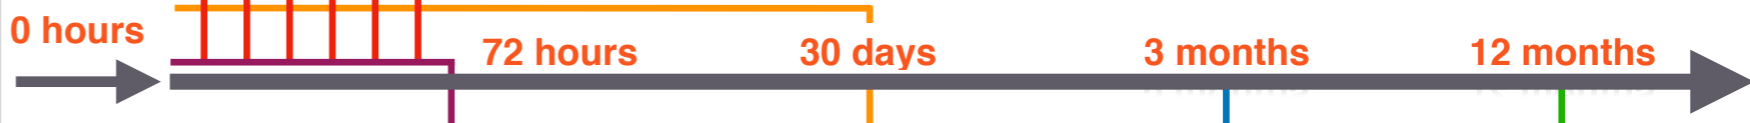

**Vitals**

**NIRS**

**Delirium**

CAM-ICU (ICU)  
bCAM (Ward)

**+ Severity**

**RBANS**

**KINARM**

**RBANS**

**KINARM**

1  
2  
3  
4  
5  
6  
7  
8  
9  
10  
11  
12  
13  
14  
15  
16  
17  
18  
19  
20  
21  
22  
23  
24  
25  
26  
27  
28  
29  
30  
31  
32  
33  
34  
35  
36  
37  
38  
39  
40  
41  
42  
43  
44  
45  
46

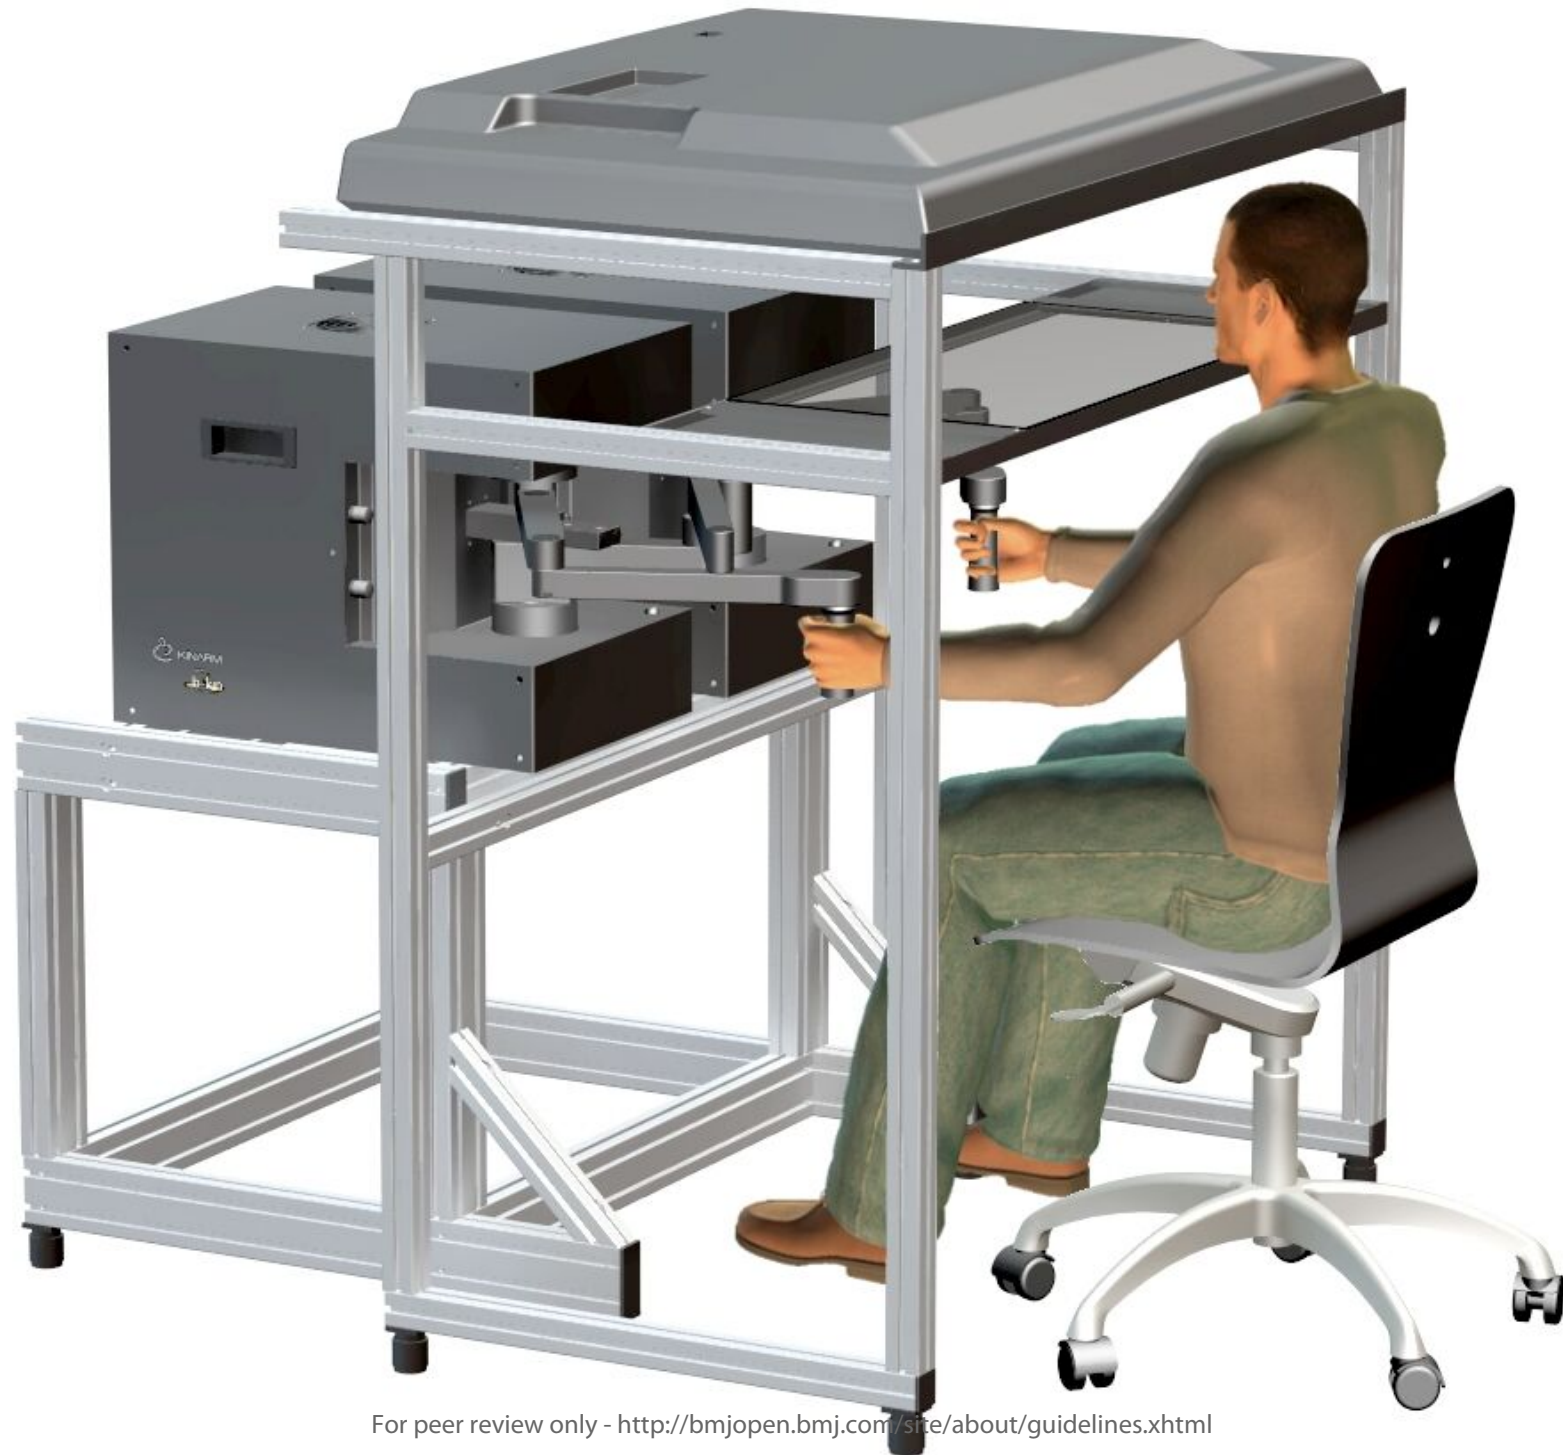

1  
2  
3  
4  
5  
6  
7  
8  
9  
10  
11  
12  
13  
14  
15  
16  
17  
18  
19  
20  
21  
22  
23  
24  
25  
26  
27  
28  
29  
30  
31  
32  
33  
34  
35  
36  
37  
38  
39  
40  
41  
42  
43  
44  
45  
46  
47  
48  
49  
50  
51  
52  
53  
54  
55  
56  
57  
58  
59  
60

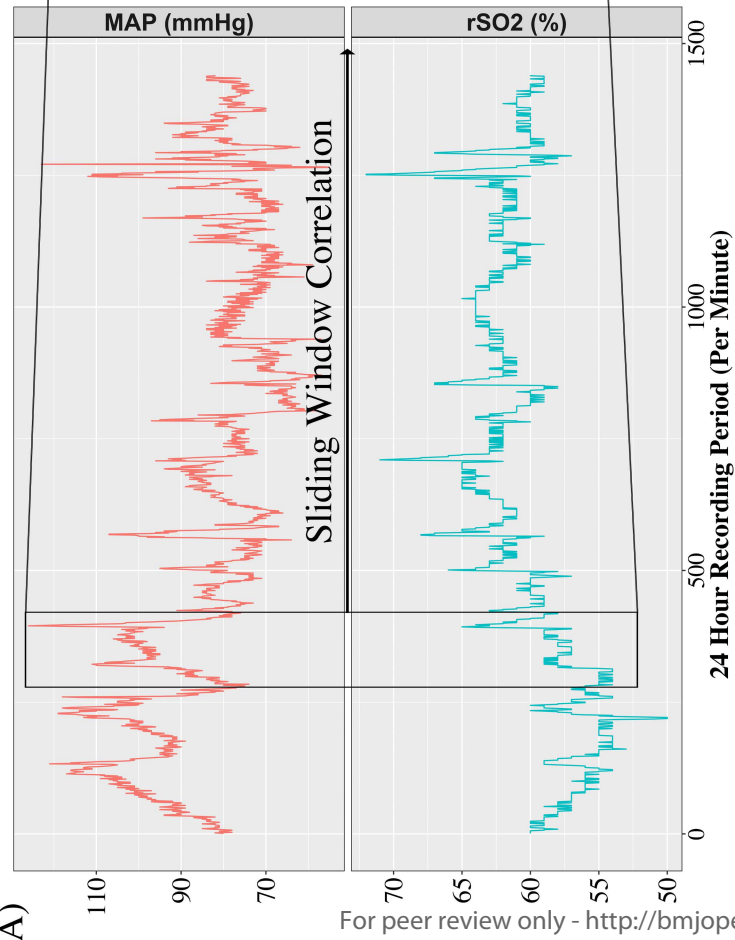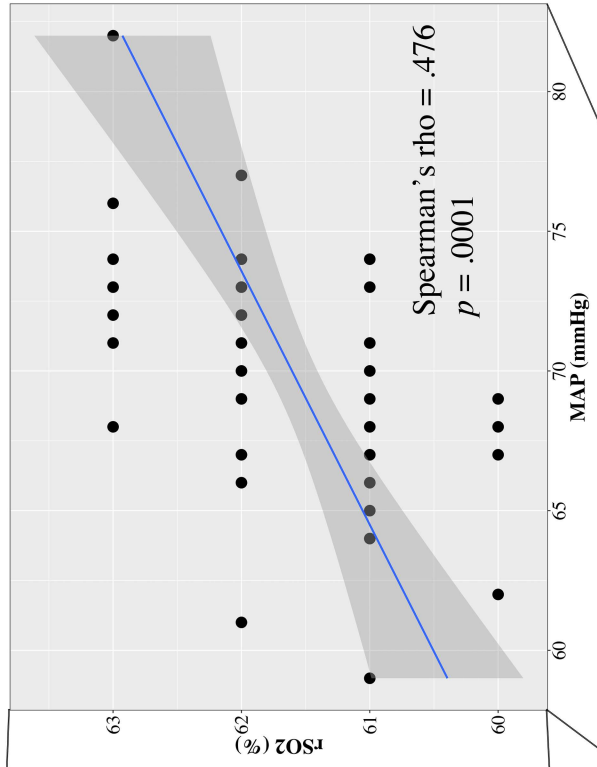

Enrolment

24 Hours

48 Hours

72 Hours

1  
2  
3  
4  
5  
6  
7  
8  
9  
10  
11  
12  
13  
14  
15  
16  
17  
18  
19  
20  
21  
22  
23  
24  
25  
26  
27  
28  
29  
30  
31  
32  
33  
34  
35  
36  
37  
38  
39  
40  
41  
42  
43  
44  
45  
46  
47

110

90

70

50



For peer review only - <http://bmjopen.bmj.com/site/about/guidelines.xhtml>

**72 Hour Recording Period (Per Minute)**

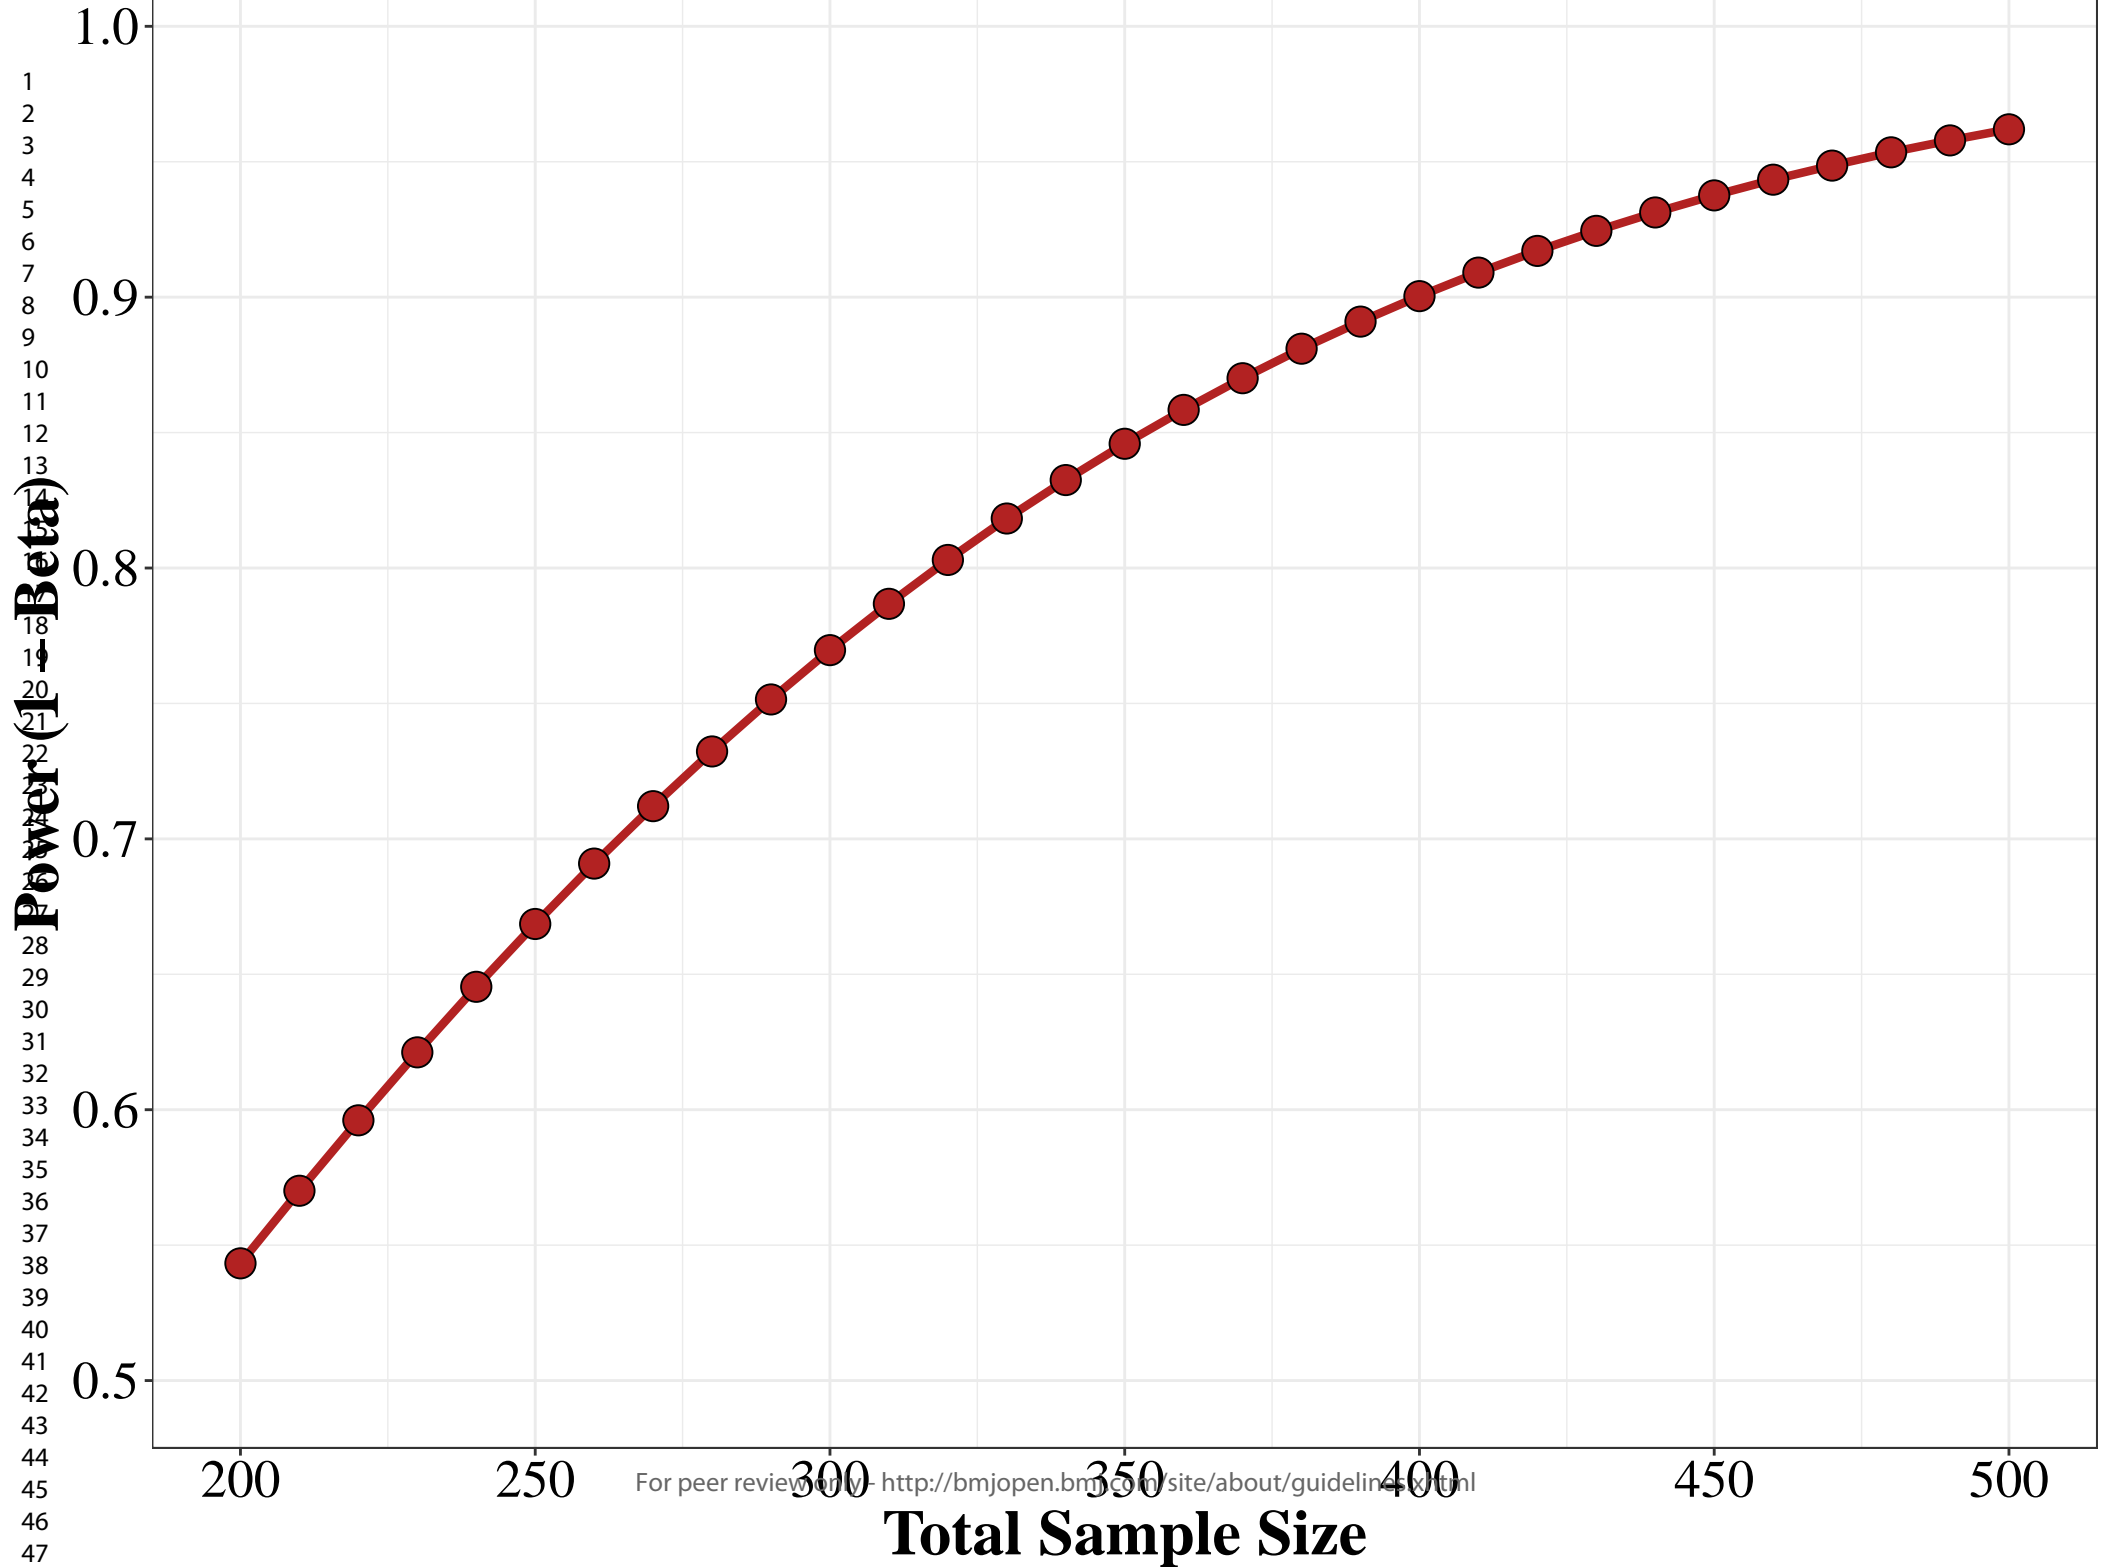





STANDARD PROTOCOL ITEMS: RECOMMENDATIONS FOR INTERVENTIONAL TRIALS

SPIRIT 2013 Checklist: Recommended items to address in a clinical trial protocol and related documents\*

| Section/item                      | Item No | Description                                                                                                                                                                                                                                                                              | Page Number on which item is reported |
|-----------------------------------|---------|------------------------------------------------------------------------------------------------------------------------------------------------------------------------------------------------------------------------------------------------------------------------------------------|---------------------------------------|
| <b>Administrative information</b> |         |                                                                                                                                                                                                                                                                                          |                                       |
| Title                             | 1       | Descriptive title identifying the study design, population, interventions, and, if applicable, trial acronym                                                                                                                                                                             | 1                                     |
| Trial registration                | 2a      | Trial identifier and registry name. If not yet registered, name of intended registry                                                                                                                                                                                                     | 4                                     |
|                                   | 2b      | All items from the World Health Organization Trial Registration Data Set                                                                                                                                                                                                                 | N/A                                   |
| Protocol version                  | 3       | Date and version identifier                                                                                                                                                                                                                                                              | N/A                                   |
| Funding                           | 4       | Sources and types of financial, material, and other support                                                                                                                                                                                                                              | 25-26                                 |
| Roles and responsibilities        | 5a      | Names, affiliations, and roles of protocol contributors                                                                                                                                                                                                                                  | 1-2,25                                |
|                                   | 5b      | Name and contact information for the trial sponsor                                                                                                                                                                                                                                       | 1                                     |
|                                   | 5c      | Role of study sponsor and funders, if any, in study design; collection, management, analysis, and interpretation of data; writing of the report; and the decision to submit the report for publication, including whether they will have ultimate authority over any of these activities | 25-26                                 |
|                                   | 5d      | Composition, roles, and responsibilities of the coordinating centre, steering committee, endpoint adjudication committee, data management team, and other individuals or groups overseeing the trial, if applicable (see Item 21a for data monitoring committee)                         | 9-10                                  |
| <b>Introduction</b>               |         |                                                                                                                                                                                                                                                                                          |                                       |



|                                                                                                          |                                                           |     |                                                                                                                                                                                                                                                                                                                                                                                |       |
|----------------------------------------------------------------------------------------------------------|-----------------------------------------------------------|-----|--------------------------------------------------------------------------------------------------------------------------------------------------------------------------------------------------------------------------------------------------------------------------------------------------------------------------------------------------------------------------------|-------|
| 1<br>2<br>3<br>4<br>5<br>6                                                                               | Background and rationale                                  | 6a  | Description of research question and justification for undertaking the trial, including summary of relevant studies (published and unpublished) examining benefits and harms for each intervention                                                                                                                                                                             | 6-7   |
| 7<br>8                                                                                                   |                                                           | 6b  | Explanation for choice of comparators                                                                                                                                                                                                                                                                                                                                          | 6-7   |
| 9<br>10                                                                                                  | Objectives                                                | 7   | Specific objectives or hypotheses                                                                                                                                                                                                                                                                                                                                              | 7     |
| 11<br>12<br>13<br>14<br>15<br>16                                                                         | Trial design                                              | 8   | Description of trial design including type of trial (eg, parallel group, crossover, factorial, single group), allocation ratio, and framework (eg, superiority, equivalence, noninferiority, exploratory)                                                                                                                                                                      | 7     |
| 17                                                                                                       | <b>Methods: Participants, interventions, and outcomes</b> |     |                                                                                                                                                                                                                                                                                                                                                                                |       |
| 18<br>19<br>20<br>21<br>22<br>23<br>24                                                                   | Study setting                                             | 9   | Description of study settings (eg, community clinic, academic hospital) and list of countries where data will be collected. Reference to where list of study sites can be obtained                                                                                                                                                                                             | 8     |
| 25<br>26<br>27<br>28<br>29<br>30                                                                         | Eligibility criteria                                      | 10  | Inclusion and exclusion criteria for participants. If applicable, eligibility criteria for study centres and individuals who will perform the interventions (eg, surgeons, psychotherapists)                                                                                                                                                                                   | 8     |
| 31<br>32<br>33<br>34<br>35<br>36<br>37<br>38<br>39<br>40<br>41<br>42<br>43<br>44<br>45<br>46<br>47<br>48 | Interventions                                             | 11a | Interventions for each group with sufficient detail to allow replication, including how and when they will be administered                                                                                                                                                                                                                                                     | N/A   |
|                                                                                                          |                                                           | 11b | Criteria for discontinuing or modifying allocated interventions for a given trial participant (eg, drug dose change in response to harms, participant request, or improving/worsening disease)                                                                                                                                                                                 | N/A   |
|                                                                                                          |                                                           | 11c | Strategies to improve adherence to intervention protocols, and any procedures for monitoring adherence (eg, drug tablet return, laboratory tests)                                                                                                                                                                                                                              | N/A   |
|                                                                                                          |                                                           | 11d | Relevant concomitant care and interventions that are permitted or prohibited during the trial                                                                                                                                                                                                                                                                                  | N/A   |
| 49<br>50<br>51<br>52<br>53<br>54<br>55<br>56<br>57<br>58<br>59<br>60                                     | Outcomes                                                  | 12  | Primary, secondary, and other outcomes, including the specific measurement variable (eg, systolic blood pressure), analysis metric (eg, change from baseline, final value, time to event), method of aggregation (eg, median, proportion), and time point for each outcome. Explanation of the clinical relevance of chosen efficacy and harm outcomes is strongly recommended | 16-18 |

|                                                                     |     |                                                                                                                                                                                                                                                                                                                                                          |       |
|---------------------------------------------------------------------|-----|----------------------------------------------------------------------------------------------------------------------------------------------------------------------------------------------------------------------------------------------------------------------------------------------------------------------------------------------------------|-------|
| Participant timeline                                                | 13  | Time schedule of enrolment, interventions (including any run-ins and washouts), assessments, and visits for participants. A schematic diagram is highly recommended (see Figure)                                                                                                                                                                         | 10-13 |
| Sample size                                                         | 14  | Estimated number of participants needed to achieve study objectives and how it was determined, including clinical and statistical assumptions supporting any sample size calculations                                                                                                                                                                    | 14-15 |
| Recruitment                                                         | 15  | Strategies for achieving adequate participant enrolment to reach target sample size                                                                                                                                                                                                                                                                      | 14-15 |
| <b>Methods: Assignment of interventions (for controlled trials)</b> |     |                                                                                                                                                                                                                                                                                                                                                          |       |
| Allocation:                                                         |     |                                                                                                                                                                                                                                                                                                                                                          |       |
| Sequence generation                                                 | 16a | Method of generating the allocation sequence (eg, computer-generated random numbers), and list of any factors for stratification. To reduce predictability of a random sequence, details of any planned restriction (eg, blocking) should be provided in a separate document that is unavailable to those who enrol participants or assign interventions | N/A   |
| Allocation concealment mechanism                                    | 16b | Mechanism of implementing the allocation sequence (eg, central telephone; sequentially numbered, opaque, sealed envelopes), describing any steps to conceal the sequence until interventions are assigned                                                                                                                                                | N/A   |
| Implementation                                                      | 16c | Who will generate the allocation sequence, who will enrol participants, and who will assign participants to interventions                                                                                                                                                                                                                                | N/A   |
| Blinding (masking)                                                  | 17a | Who will be blinded after assignment to interventions (eg, trial participants, care providers, outcome assessors, data analysts), and how                                                                                                                                                                                                                | N/A   |
|                                                                     | 17b | If blinded, circumstances under which unblinding is permissible, and procedure for revealing a participant's allocated intervention during the trial                                                                                                                                                                                                     | N/A   |
| <b>Methods: Data collection, management, and analysis</b>           |     |                                                                                                                                                                                                                                                                                                                                                          |       |

|                                                          |                            |     |                                                                                                                                                                                                                                                                                                                                                                                                              |       |
|----------------------------------------------------------|----------------------------|-----|--------------------------------------------------------------------------------------------------------------------------------------------------------------------------------------------------------------------------------------------------------------------------------------------------------------------------------------------------------------------------------------------------------------|-------|
| 1<br>2<br>3<br>4<br>5<br>6<br>7<br>8<br>9<br>10<br>11    | Data collection methods    | 18a | Plans for assessment and collection of outcome, baseline, and other trial data, including any related processes to promote data quality (eg, duplicate measurements, training of assessors) and a description of study instruments (eg, questionnaires, laboratory tests) along with their reliability and validity, if known. Reference to where data collection forms can be found, if not in the protocol | 10-13 |
| 12<br>13<br>14<br>15<br>16<br>17                         |                            | 18b | Plans to promote participant retention and complete follow-up, including list of any outcome data to be collected for participants who discontinue or deviate from intervention protocols                                                                                                                                                                                                                    | 14-15 |
| 18<br>19<br>20<br>21<br>22<br>23<br>24<br>25             | Data management            | 19  | Plans for data entry, coding, security, and storage, including any related processes to promote data quality (eg, double data entry; range checks for data values). Reference to where details of data management procedures can be found, if not in the protocol                                                                                                                                            | 8-10  |
| 26<br>27<br>28<br>29<br>30<br>31                         | Statistical methods        | 20a | Statistical methods for analysing primary and secondary outcomes. Reference to where other details of the statistical analysis plan can be found, if not in the protocol                                                                                                                                                                                                                                     | 15-18 |
| 32<br>33<br>34                                           |                            | 20b | Methods for any additional analyses (eg, subgroup and adjusted analyses)                                                                                                                                                                                                                                                                                                                                     | 15-18 |
| 35<br>36<br>37<br>38<br>39<br>40                         |                            | 20c | Definition of analysis population relating to protocol non-adherence (eg, as randomised analysis), and any statistical methods to handle missing data (eg, multiple imputation)                                                                                                                                                                                                                              | 15-18 |
| 41<br>42                                                 | <b>Methods: Monitoring</b> |     |                                                                                                                                                                                                                                                                                                                                                                                                              |       |
| 43<br>44<br>45<br>46<br>47<br>48<br>49<br>50<br>51<br>52 | Data monitoring            | 21a | Composition of data monitoring committee (DMC); summary of its role and reporting structure; statement of whether it is independent from the sponsor and competing interests; and reference to where further details about its charter can be found, if not in the protocol. Alternatively, an explanation of why a DMC is not needed                                                                        | N/A   |
| 53<br>54<br>55<br>56<br>57<br>58<br>59<br>60             |                            | 21b | Description of any interim analyses and stopping guidelines, including who will have access to these interim results and make the final decision to terminate the trial                                                                                                                                                                                                                                      | N/A   |

|                                 |     |                                                                                                                                                                                                                                                                                     |      |
|---------------------------------|-----|-------------------------------------------------------------------------------------------------------------------------------------------------------------------------------------------------------------------------------------------------------------------------------------|------|
| Harms                           | 22  | Plans for collecting, assessing, reporting, and managing solicited and spontaneously reported adverse events and other unintended effects of trial interventions or trial conduct                                                                                                   | 20   |
| Auditing                        | 23  | Frequency and procedures for auditing trial conduct, if any, and whether the process will be independent from investigators and the sponsor                                                                                                                                         | N/A  |
| <b>Ethics and dissemination</b> |     |                                                                                                                                                                                                                                                                                     |      |
| Research ethics approval        | 24  | Plans for seeking research ethics committee/institutional review board (REC/IRB) approval                                                                                                                                                                                           | 9,20 |
| Protocol amendments             | 25  | Plans for communicating important protocol modifications (eg, changes to eligibility criteria, outcomes, analyses) to relevant parties (eg, investigators, REC/IRBs, trial participants, trial registries, journals, regulators)                                                    | N/A  |
| Consent or assent               | 26a | Who will obtain informed consent or assent from potential trial participants or authorised surrogates, and how (see Item 32)                                                                                                                                                        | 9-10 |
|                                 | 26b | Additional consent provisions for collection and use of participant data and biological specimens in ancillary studies, if applicable                                                                                                                                               | N/A  |
| Confidentiality                 | 27  | How personal information about potential and enrolled participants will be collected, shared, and maintained in order to protect confidentiality before, during, and after the trial                                                                                                | 9-10 |
| Declaration of interests        | 28  | Financial and other competing interests for principal investigators for the overall trial and each study site                                                                                                                                                                       | 26   |
| Access to data                  | 29  | Statement of who will have access to the final trial dataset, and disclosure of contractual agreements that limit such access for investigators                                                                                                                                     | 10   |
| Ancillary and post-trial care   | 30  | Provisions, if any, for ancillary and post-trial care, and for compensation to those who suffer harm from trial participation                                                                                                                                                       | N/A  |
| Dissemination policy            | 31a | Plans for investigators and sponsor to communicate trial results to participants, healthcare professionals, the public, and other relevant groups (eg, via publication, reporting in results databases, or other data sharing arrangements), including any publication restrictions | 20   |

|                            |     |                                                                                                                                                                                                |     |
|----------------------------|-----|------------------------------------------------------------------------------------------------------------------------------------------------------------------------------------------------|-----|
|                            | 31b | Authorship eligibility guidelines and any intended use of professional writers                                                                                                                 | 20  |
|                            | 31c | Plans, if any, for granting public access to the full protocol, participant-level dataset, and statistical code                                                                                | 20  |
| <b>Appendices</b>          |     |                                                                                                                                                                                                |     |
| Informed consent materials | 32  | Model consent form and other related documentation given to participants and authorised surrogates                                                                                             | N/A |
| Biological specimens       | 33  | Plans for collection, laboratory evaluation, and storage of biological specimens for genetic or molecular analysis in the current trial and for future use in ancillary studies, if applicable | N/A |

\*It is strongly recommended that this checklist be read in conjunction with the SPIRIT 2013 Explanation & Elaboration for important clarification on the items. Amendments to the protocol should be tracked and dated. The SPIRIT checklist is copyrighted by the SPIRIT Group under the Creative Commons "[Attribution-NonCommercial-NoDerivs 3.0 Unported](#)" license.
